# Supplementary material for: Atypical hemolytic uremic syndrome in the era of terminal complement inhibition: an observational cohort study
Source: PubMed Central journal article supplement — Blood. 2023 Jun 29;142(16):1371–86. doi: 10.1182/blood.2022018833 (PMC10651868; doi:10.1182/blood.2022018833), 2023-06-29
Supplement: BLOOD_BLD-2022-018833R2-mmc1.pdf [file BLOOD_BLD-2022-018833R2-mmc1.pdf]

# Supplemental Figures

eFigure 1A

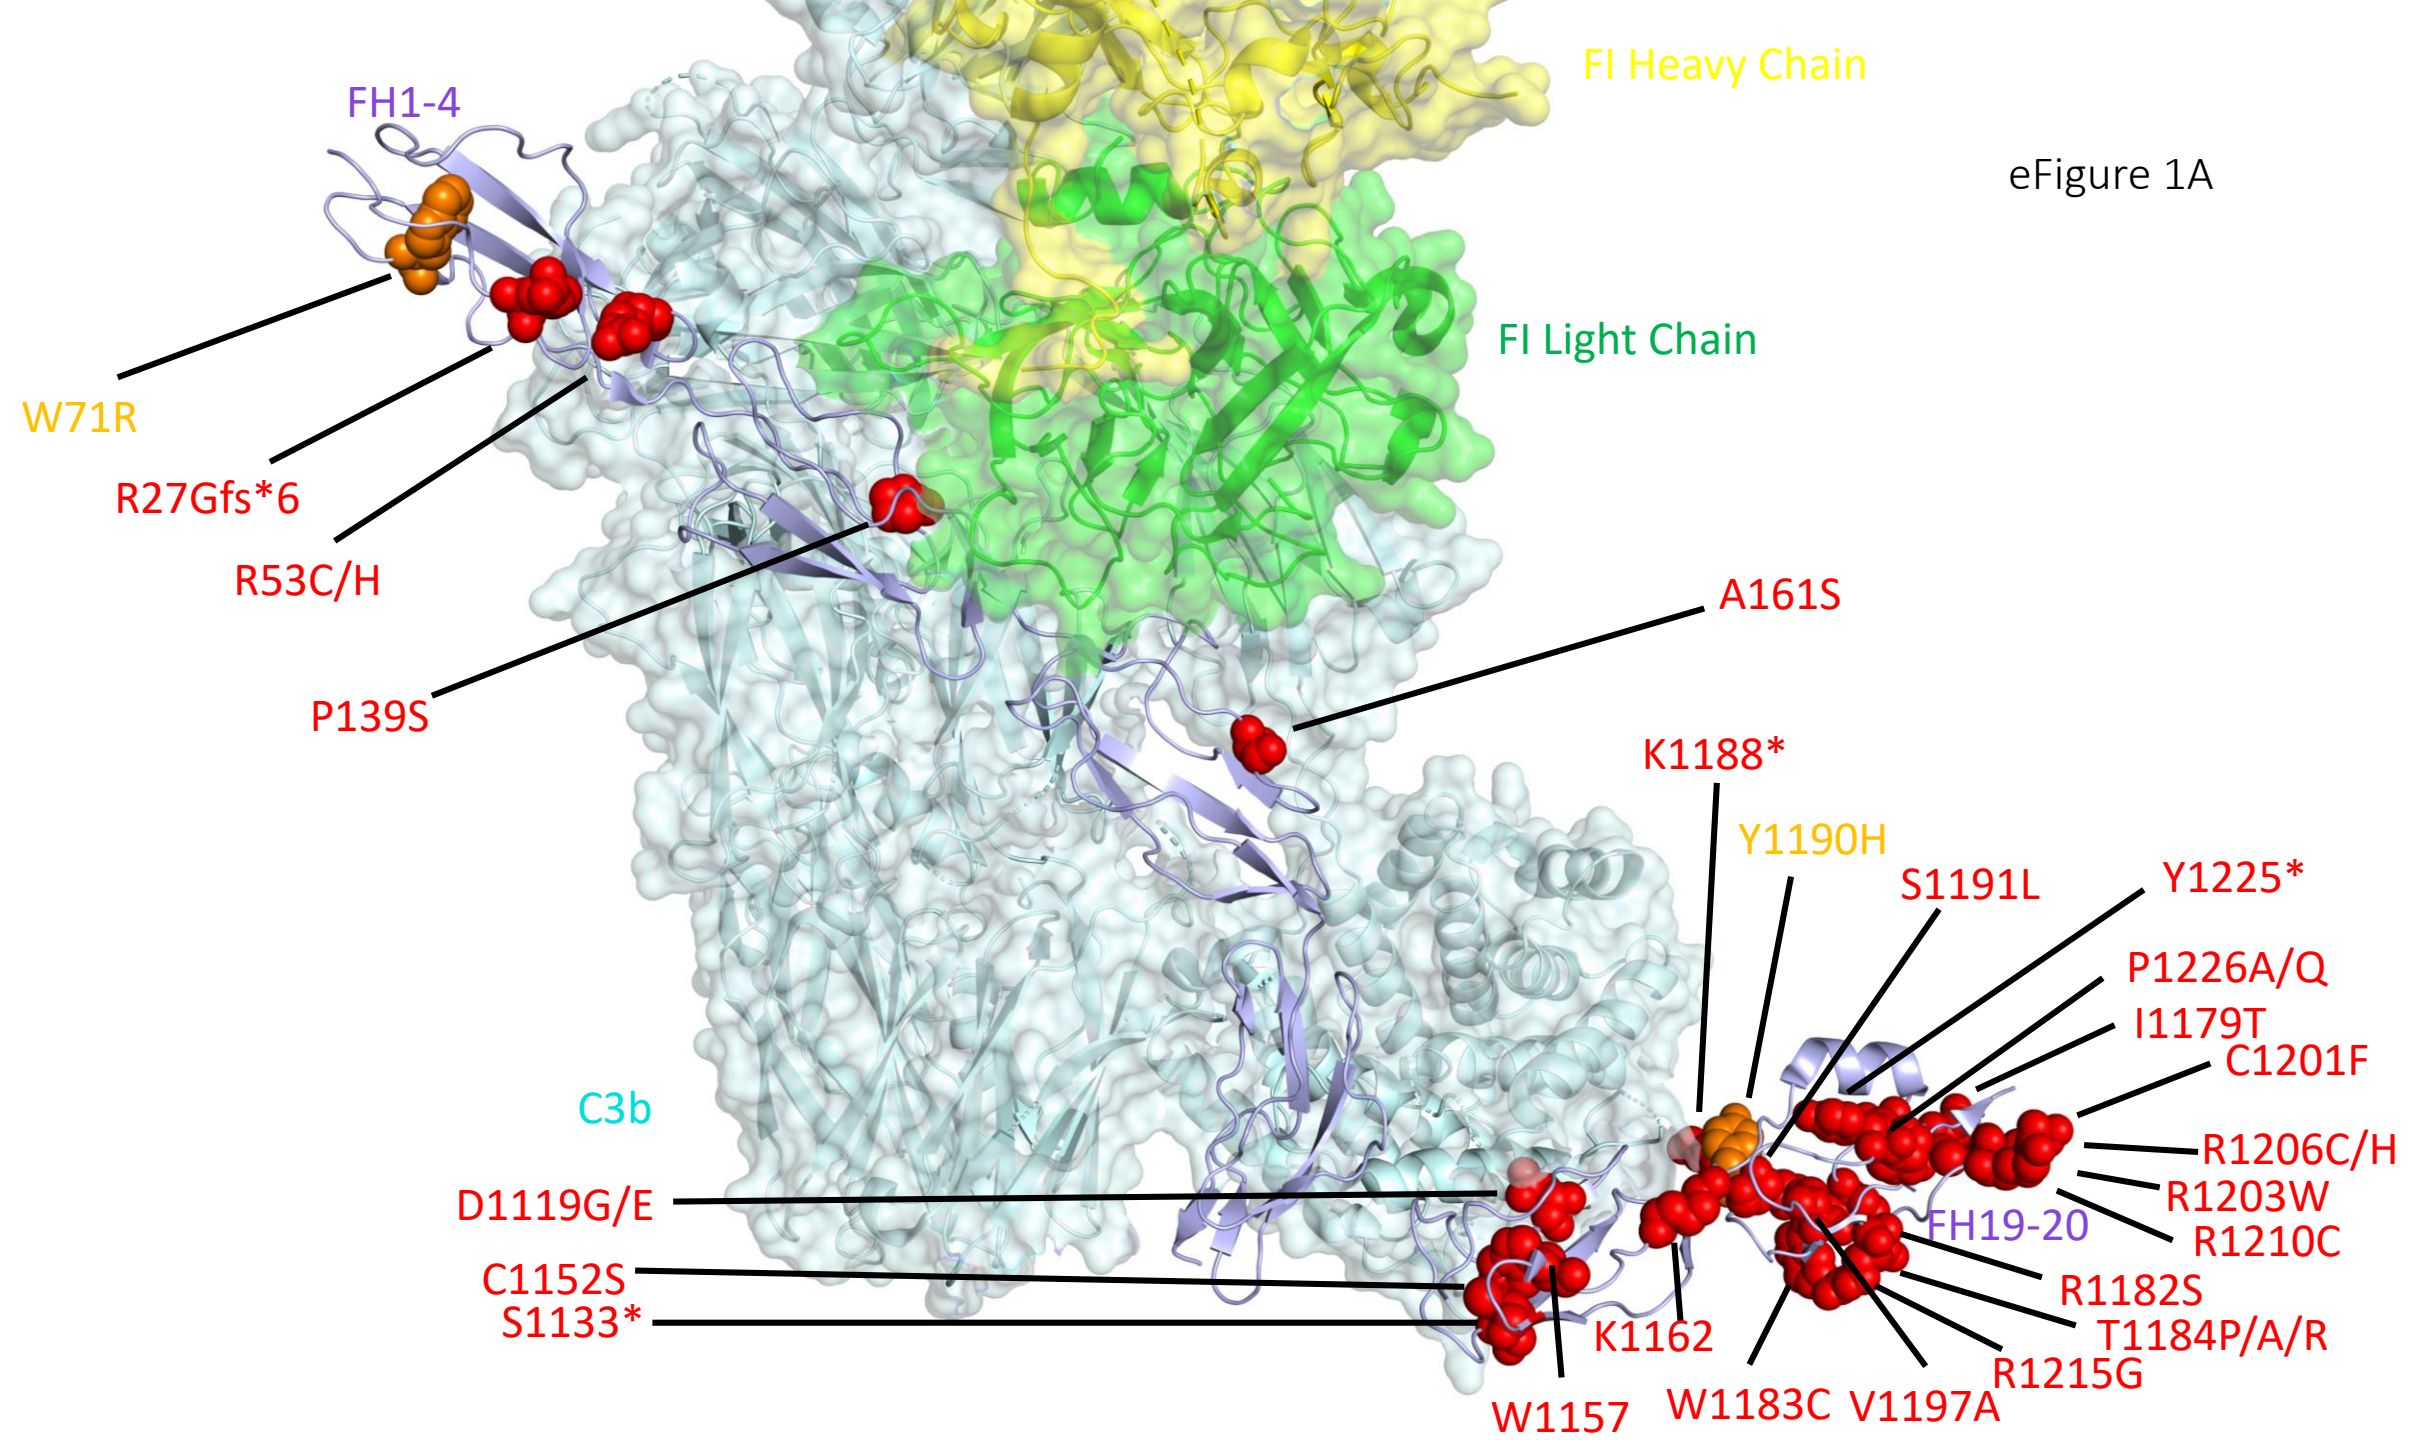

eFigure 1B

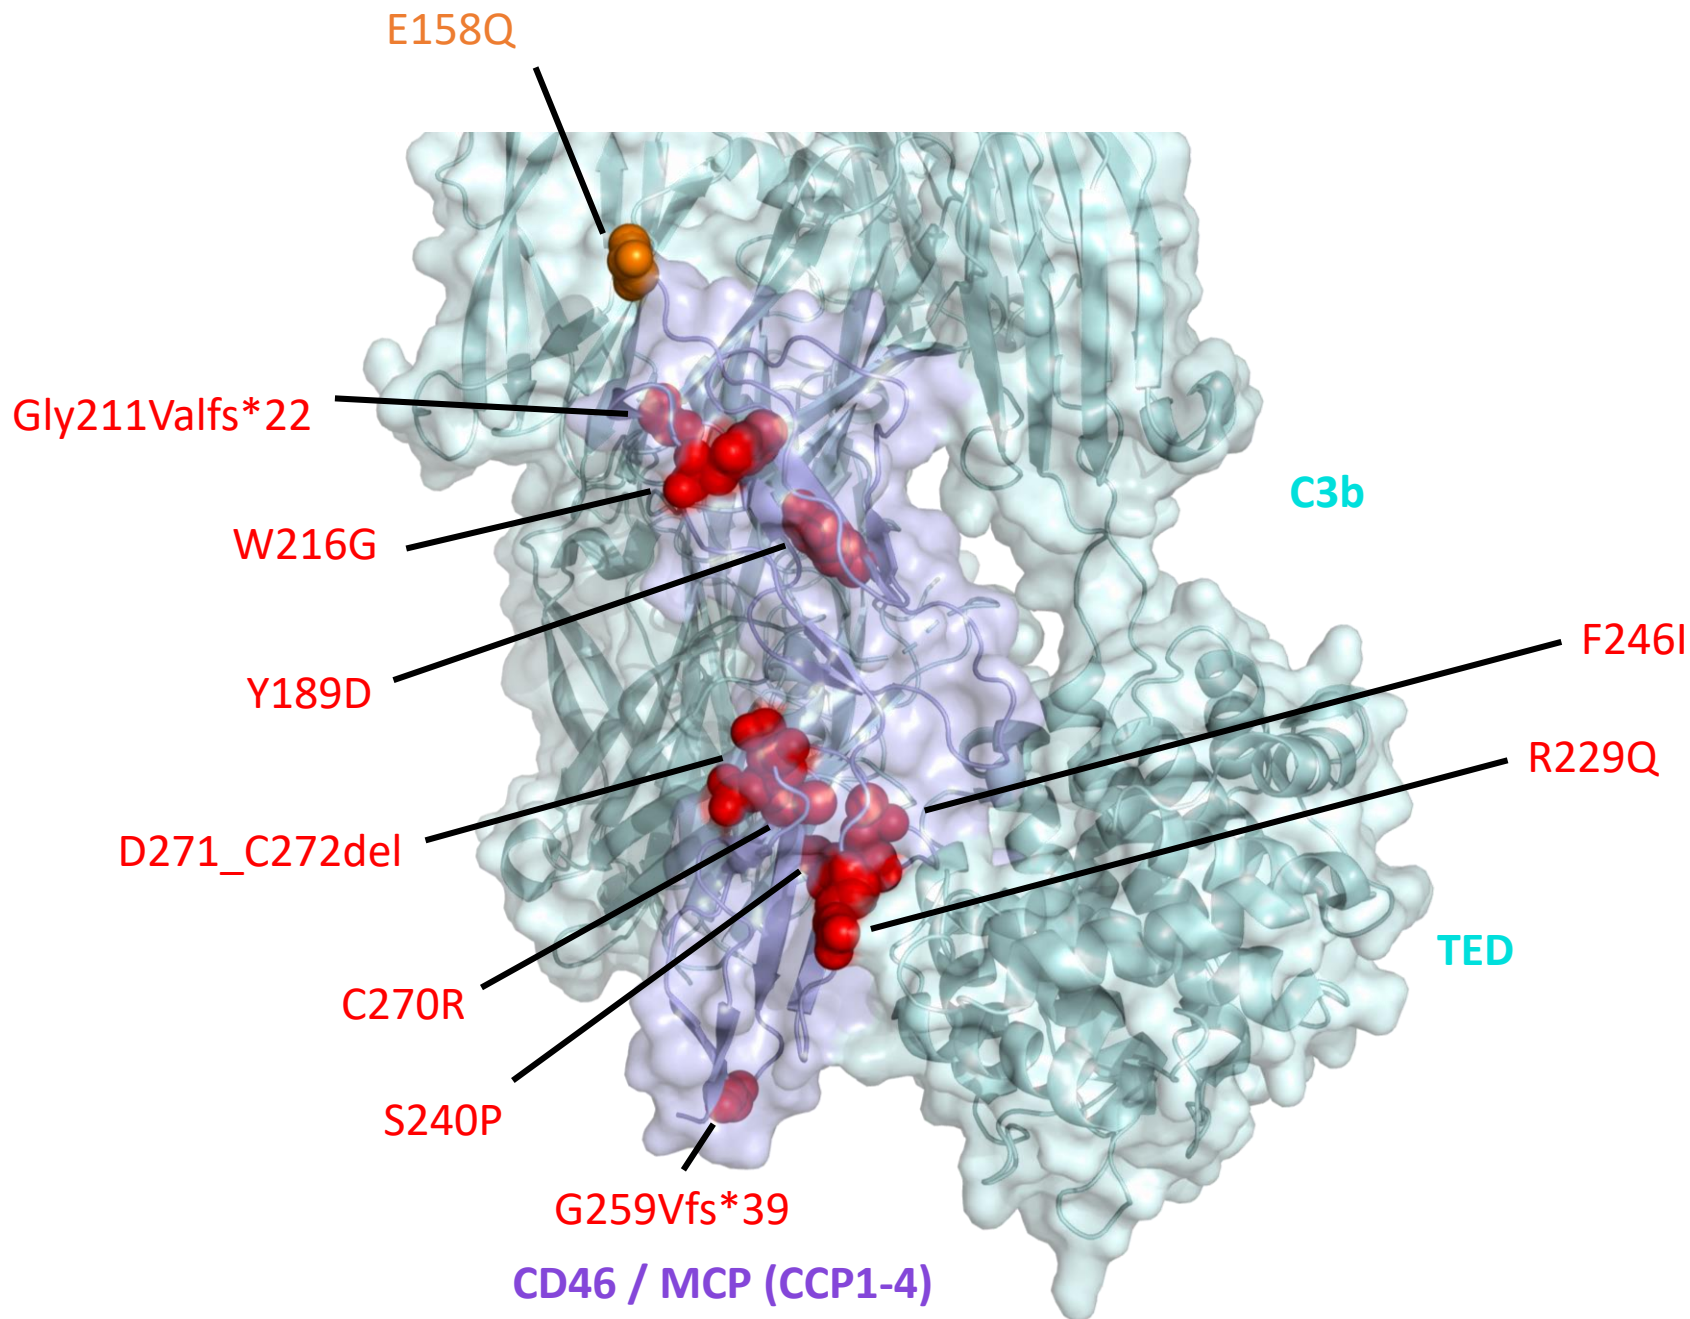

eFigure 1C

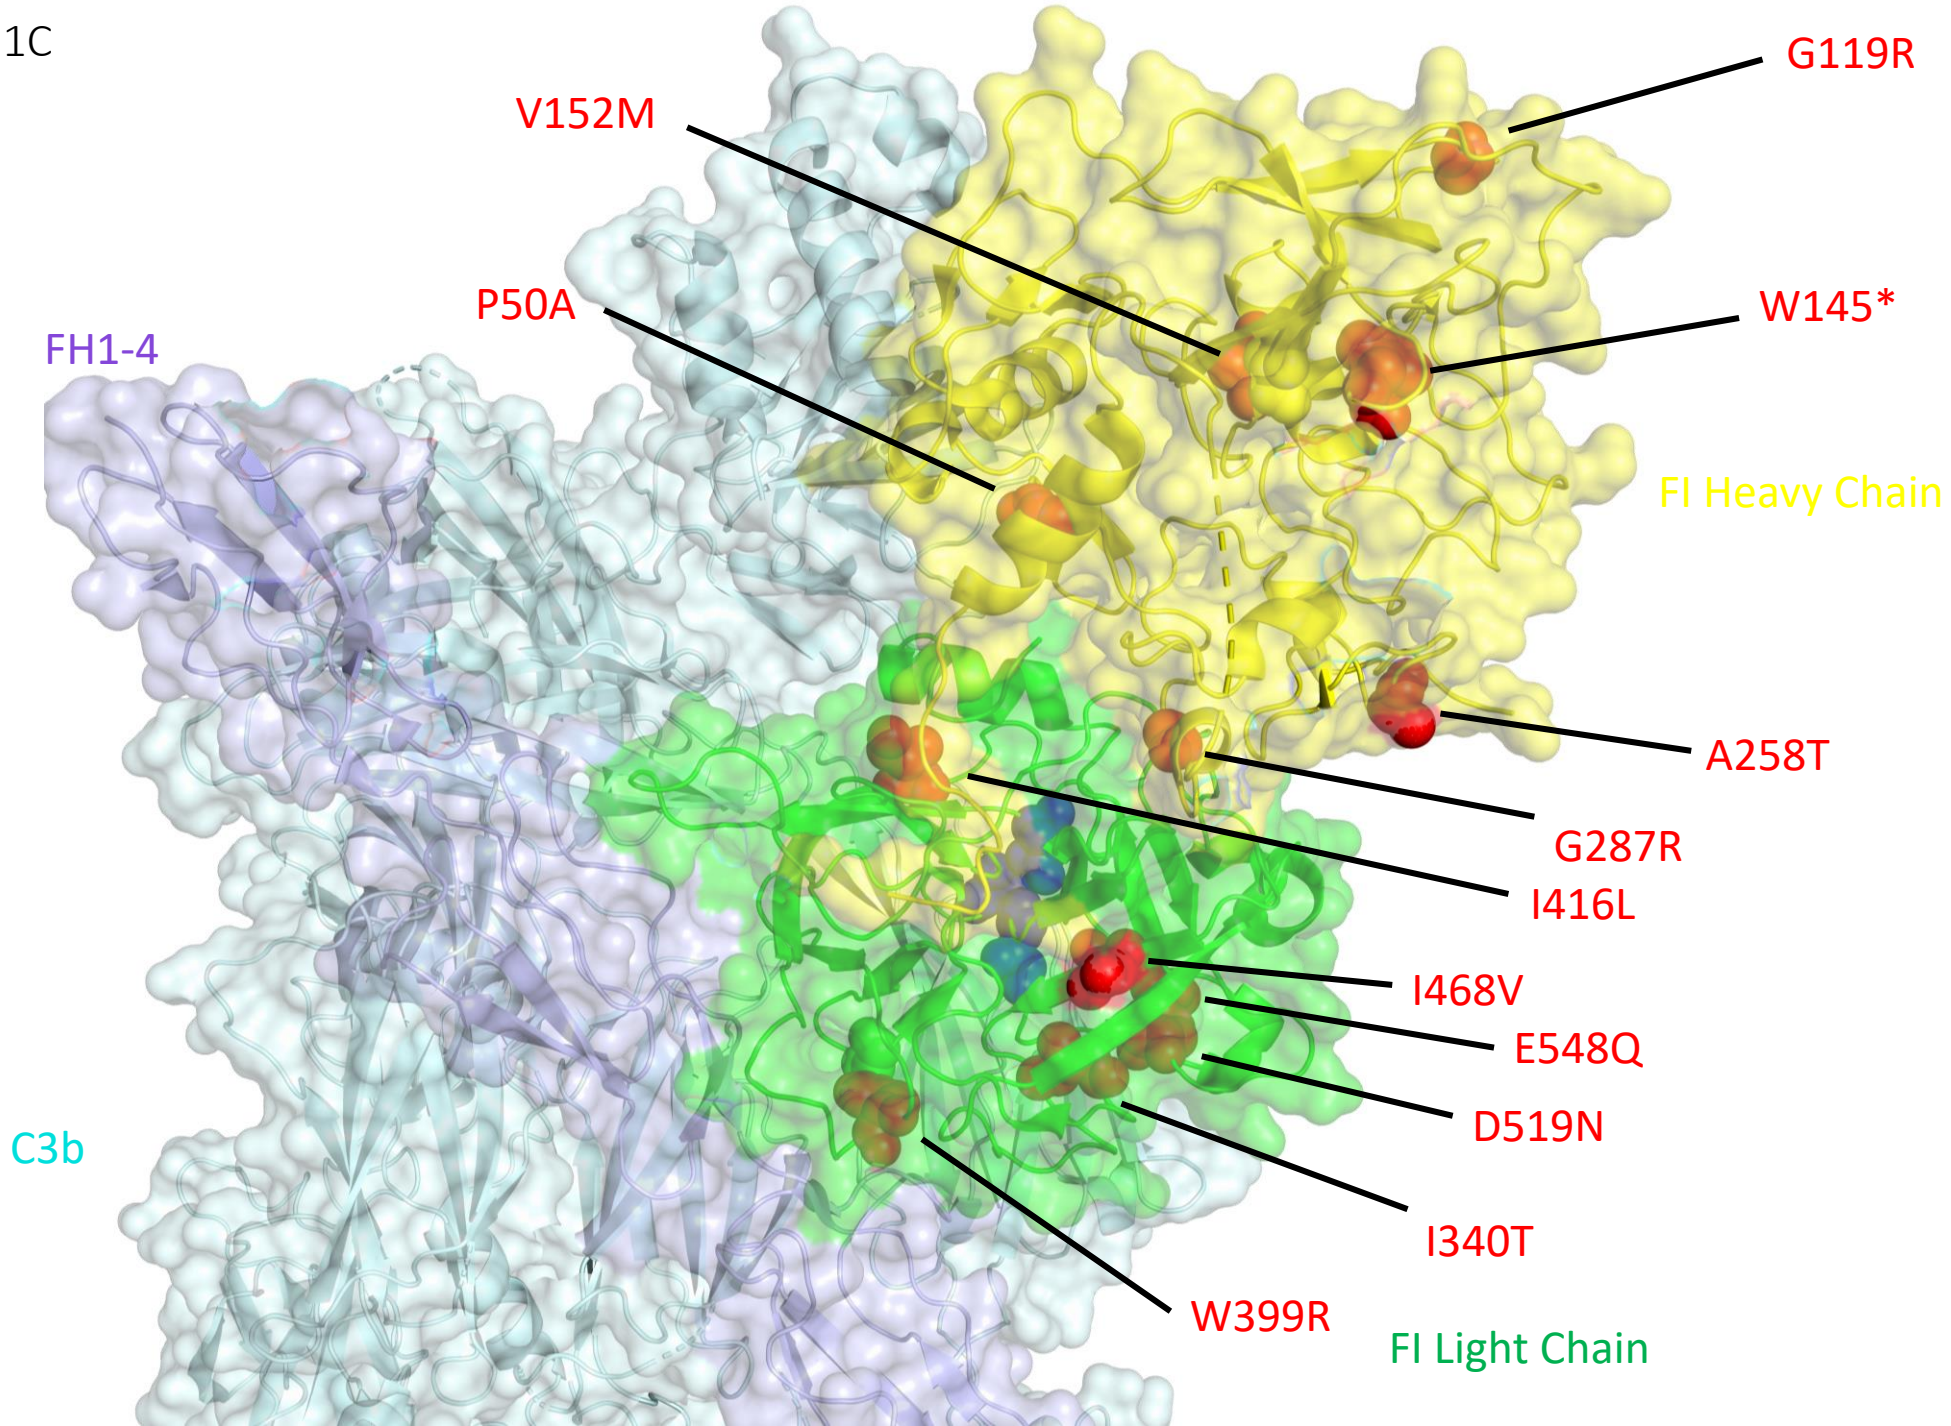

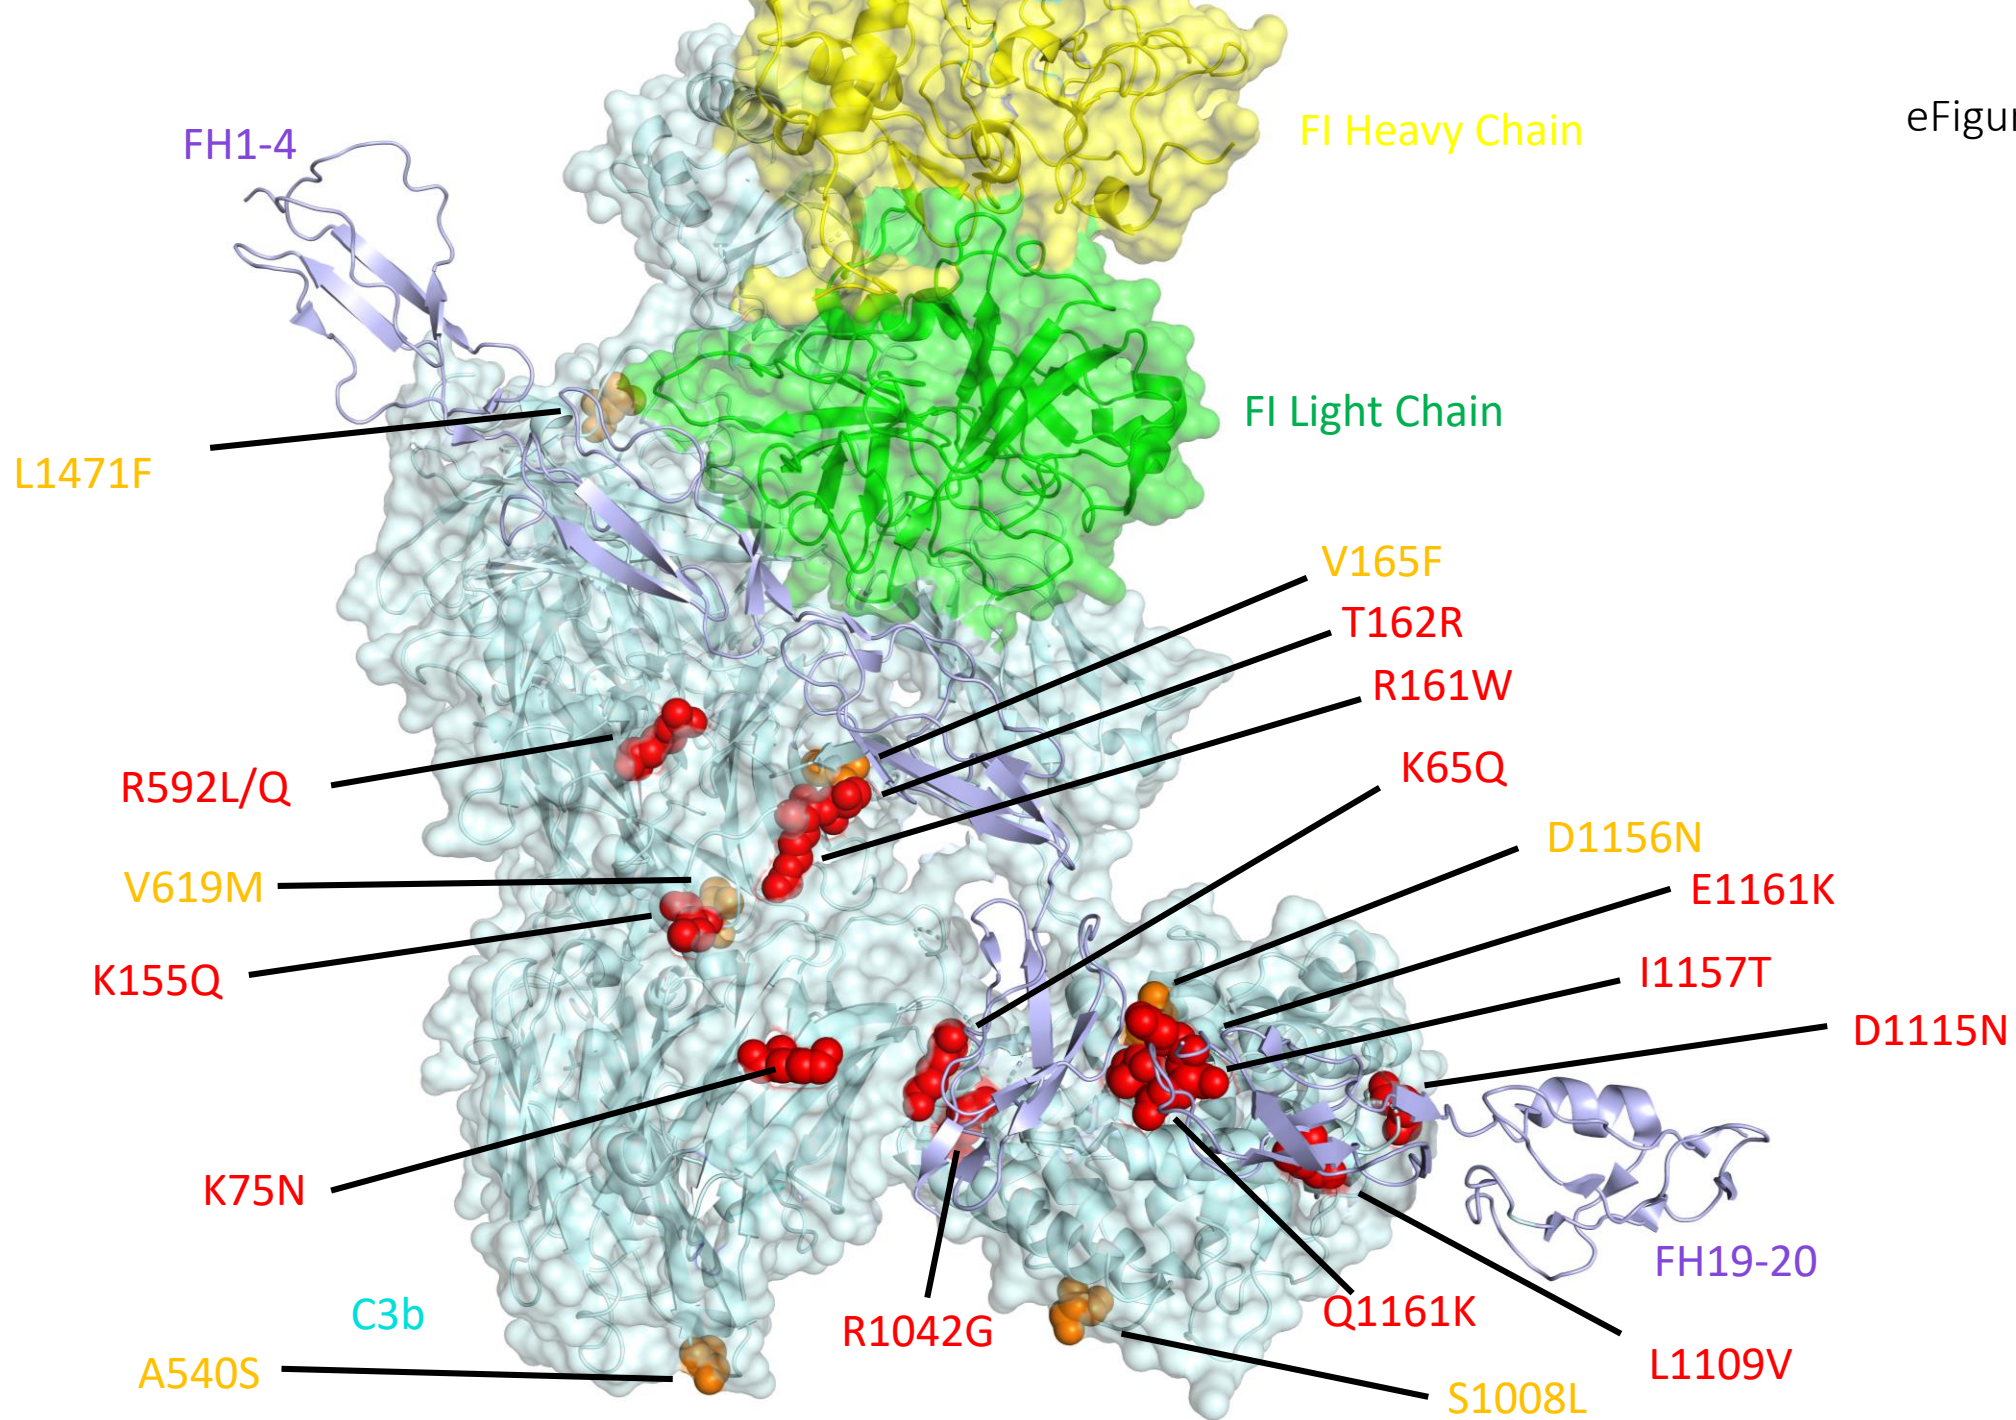

eFigure 1E

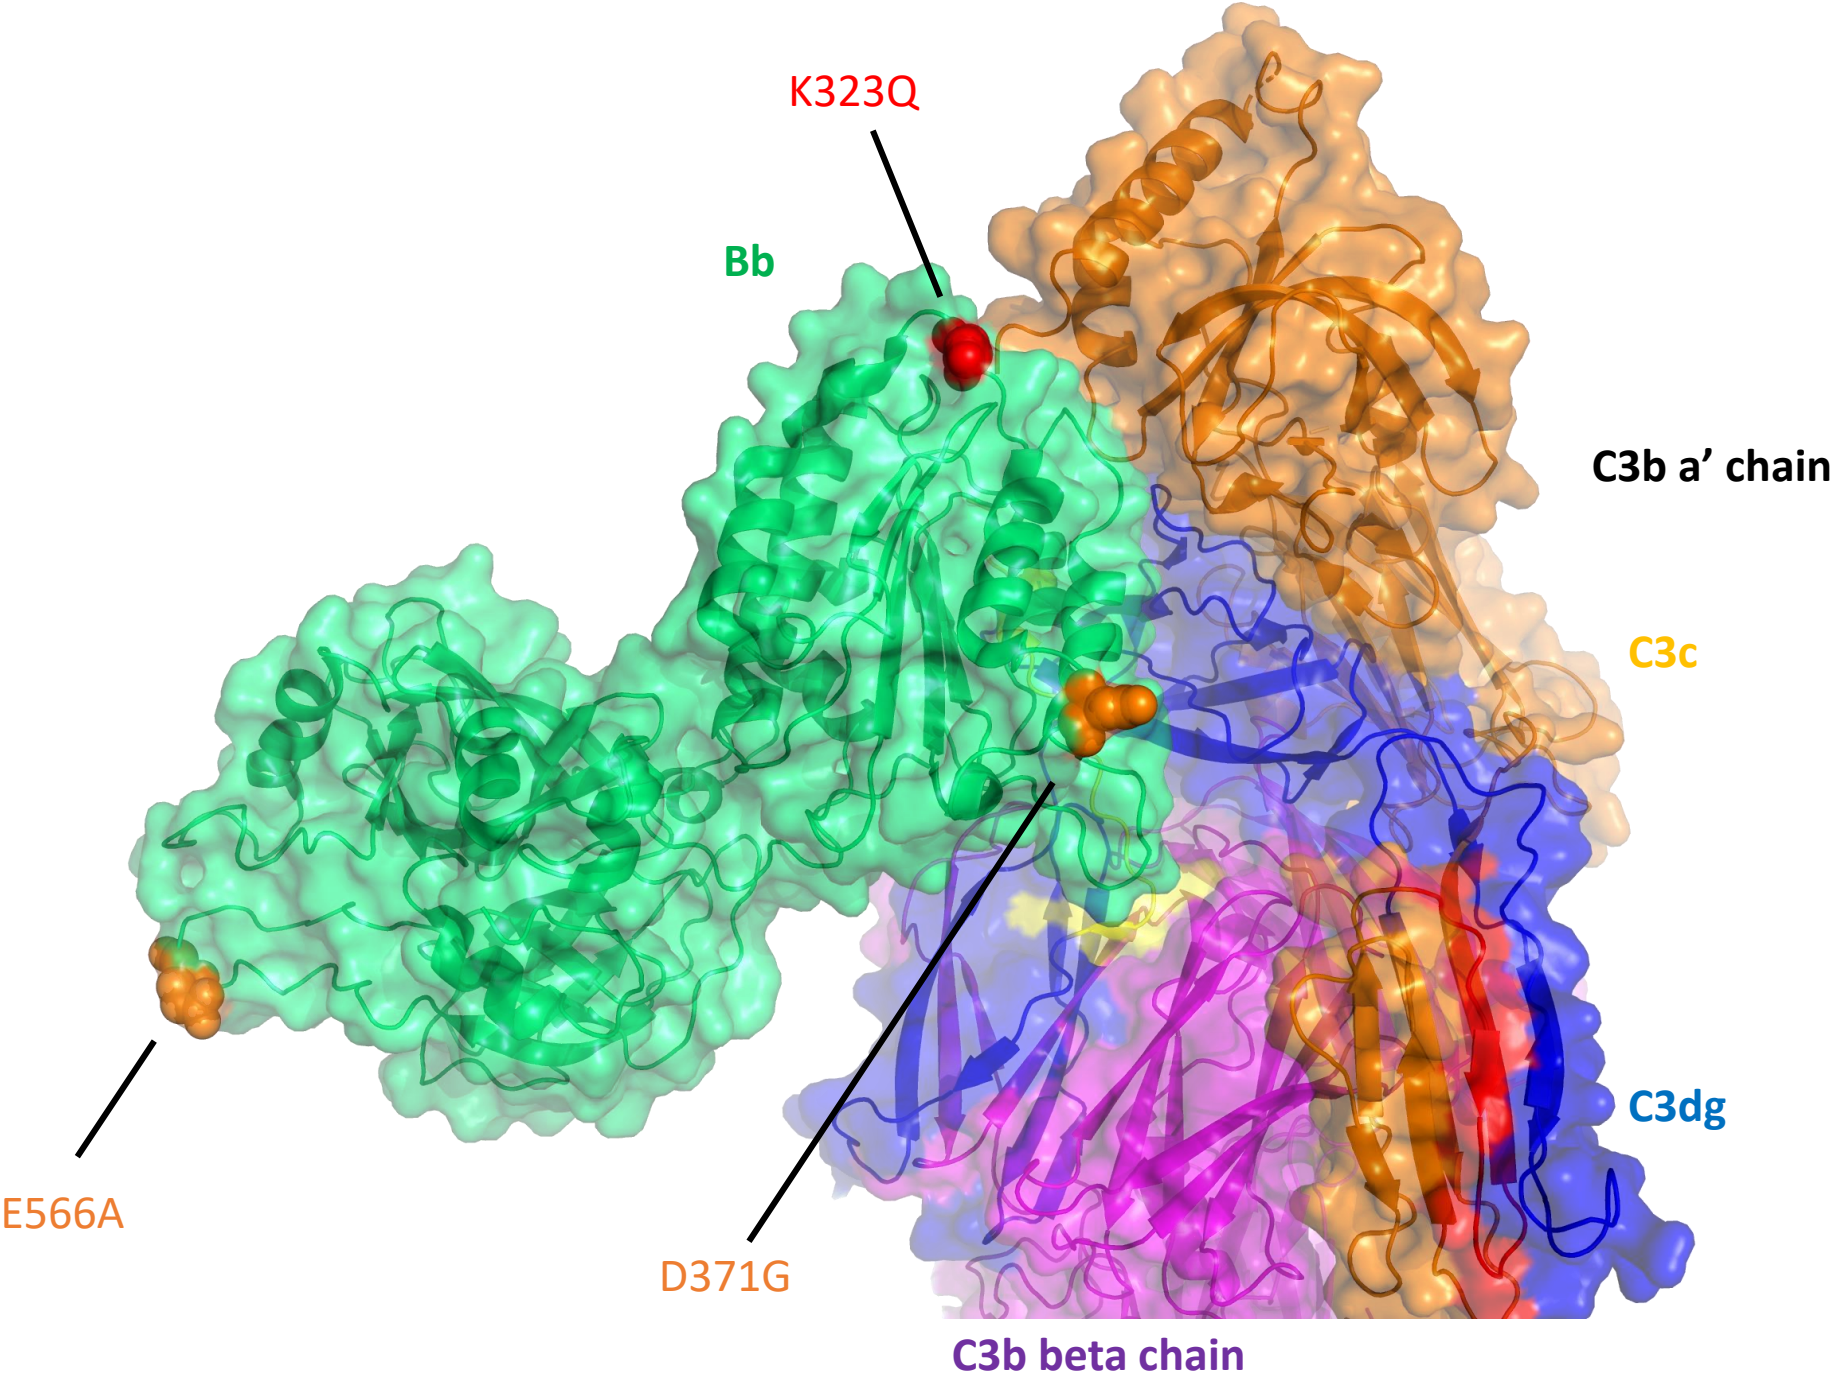



eFigure 3: Clinical characteristics at presentation

A. Blood pressure

i. Adults

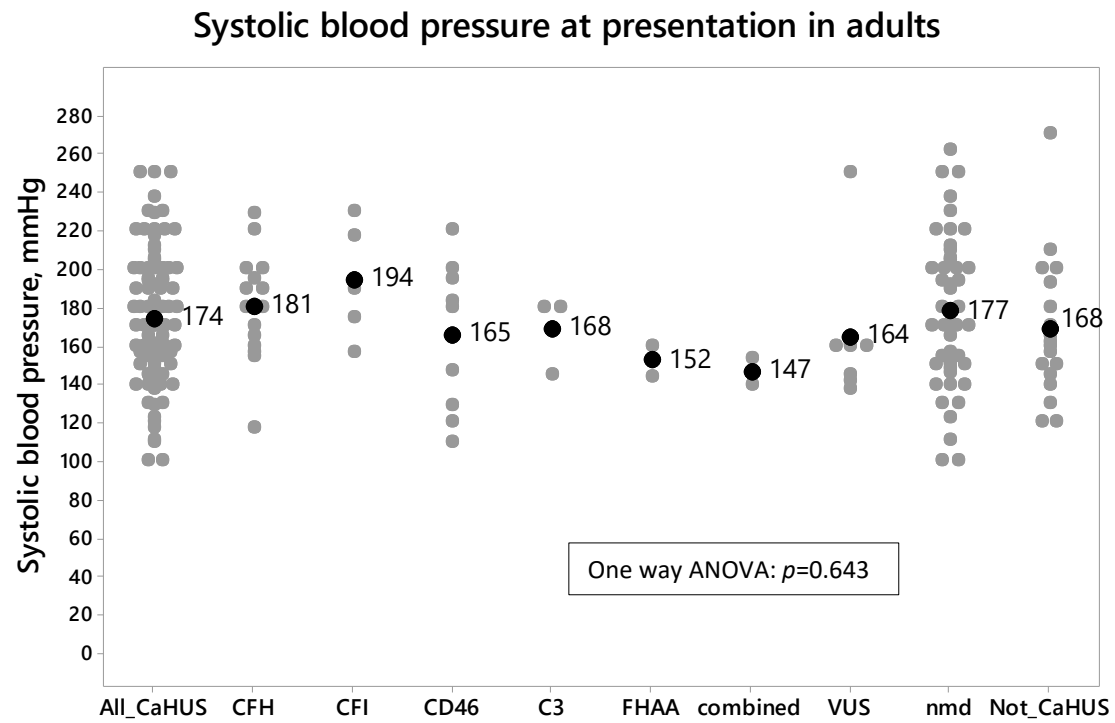

ii. Children

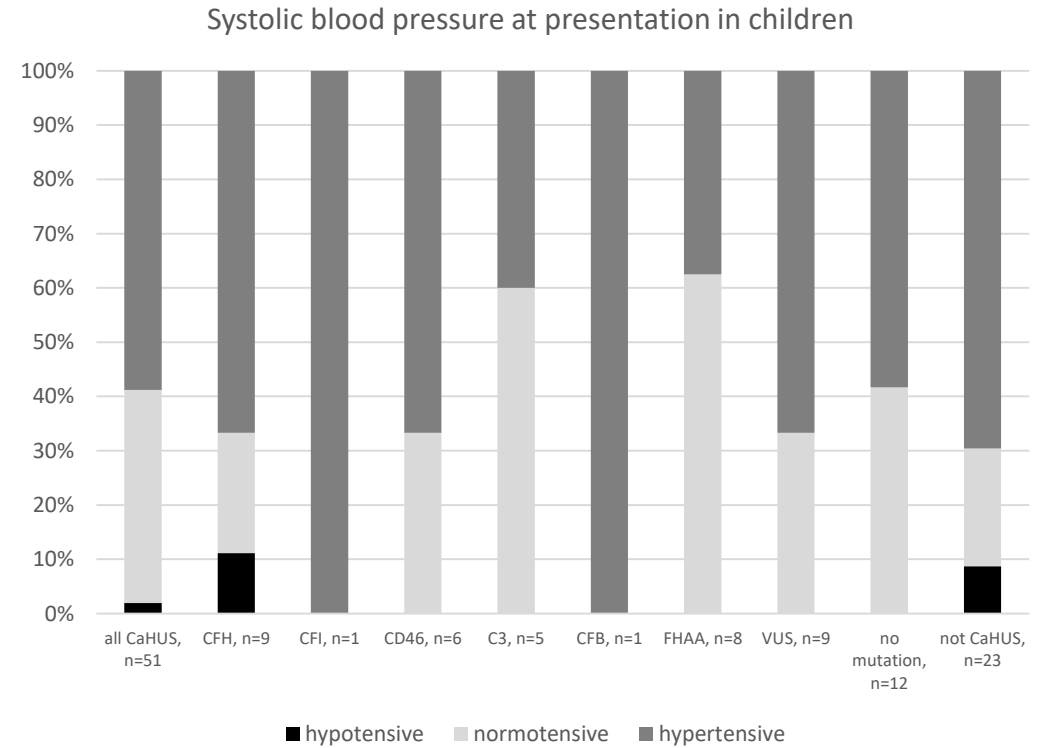



eFigure 3: Clinical characteristics at presentation  
 B. Proteinuria

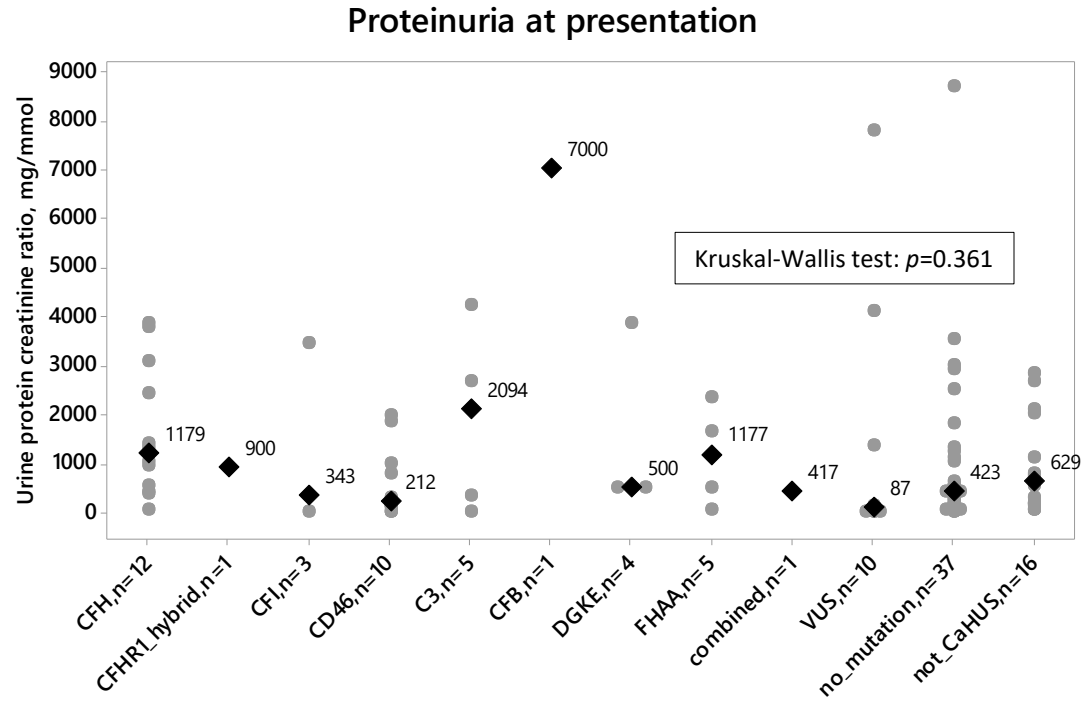

C. CRP

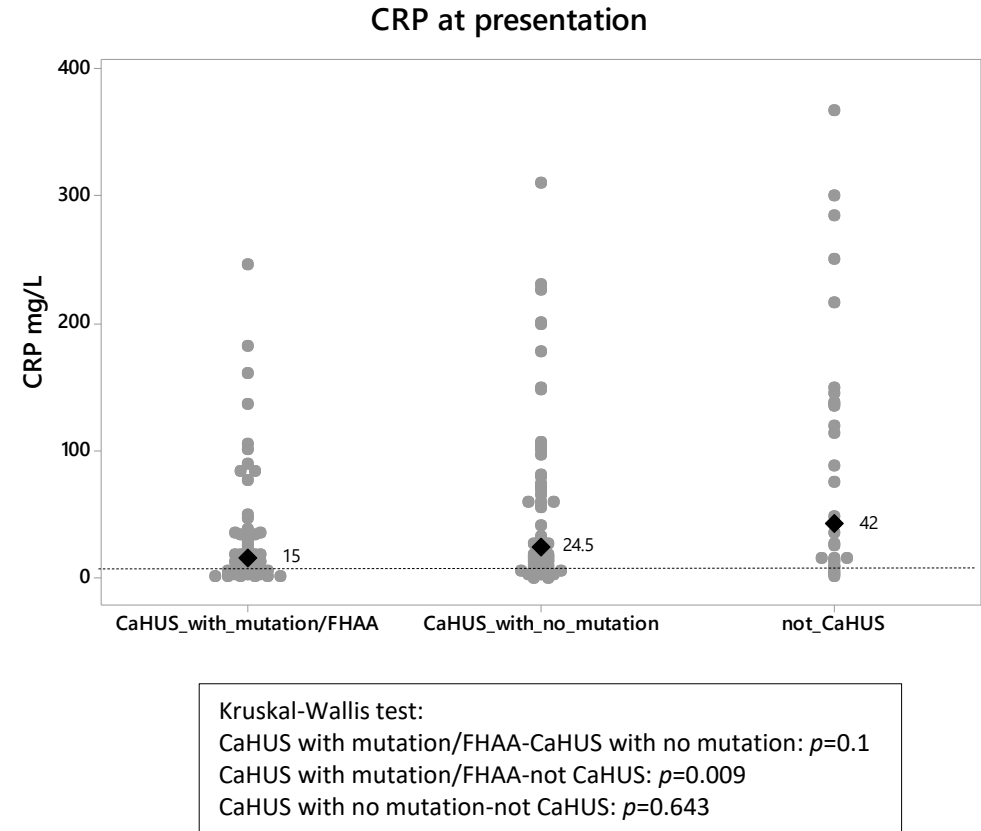

eFigure 3: Clinical characteristics at presentation  
D. Complement profile

i.

C3 at presentation

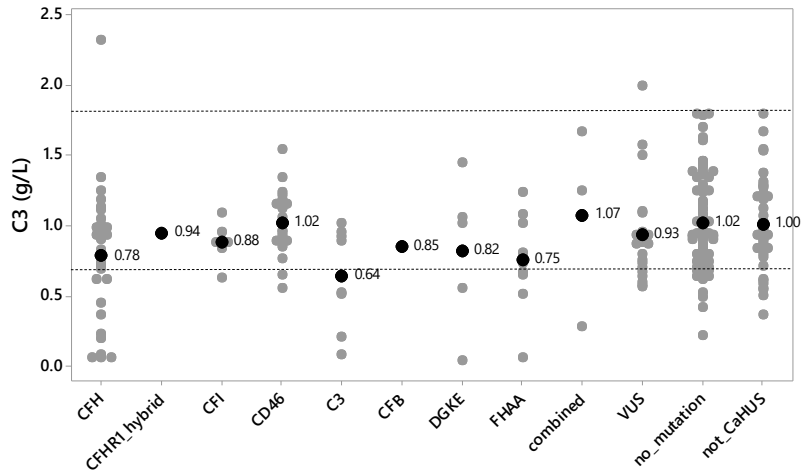

Applying the Gabriel multiple comparisons post hoc analysis to the one way ANOVA showed a statistically significant difference only between the C3 and no mutation groups,  $p=0.028$

ii.

C4 at presentation

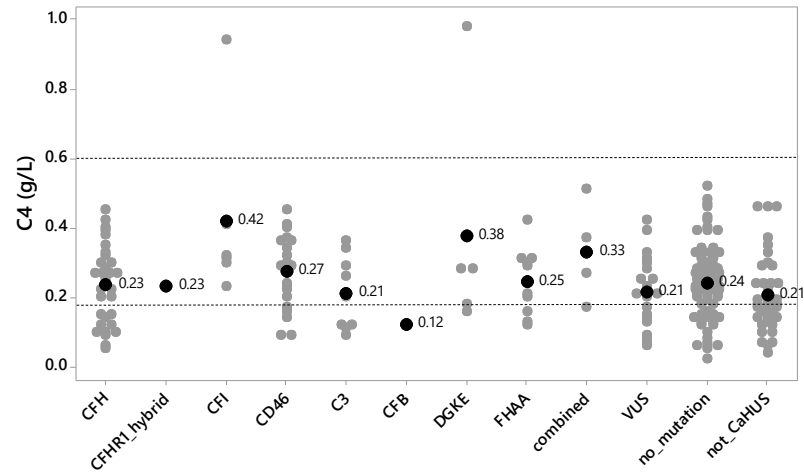

Applying the Gabriel multiple comparisons post hoc analysis to the one way ANOVA showed a statistically significant difference only between the CFI and no mutation groups,  $p=0.001$

iii.

sC5b-9 at presentation

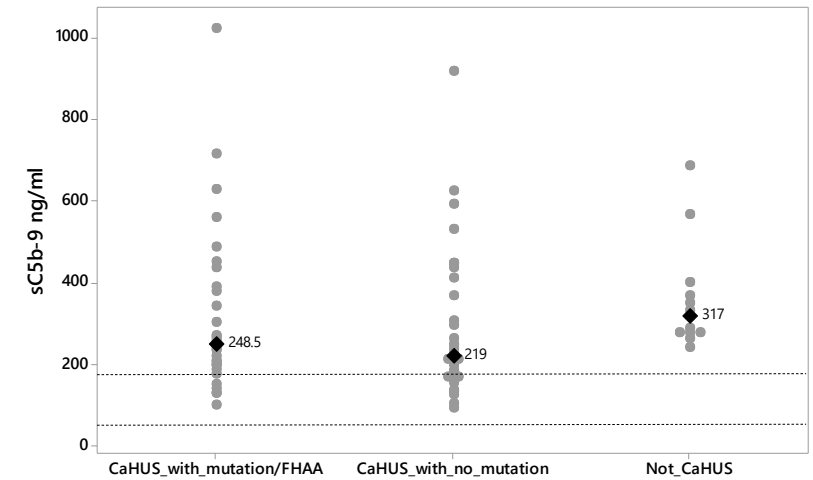

Kruskal-Wallis test:  
CaHUS with mutation/FHAA-CaHUS with no mutation:  $p=1.0$   
CaHUS with mutation/FHAA-not CaHUS:  $p=0.152$   
CaHUS with no mutation-not CaHUS:  $p=0.041$

A

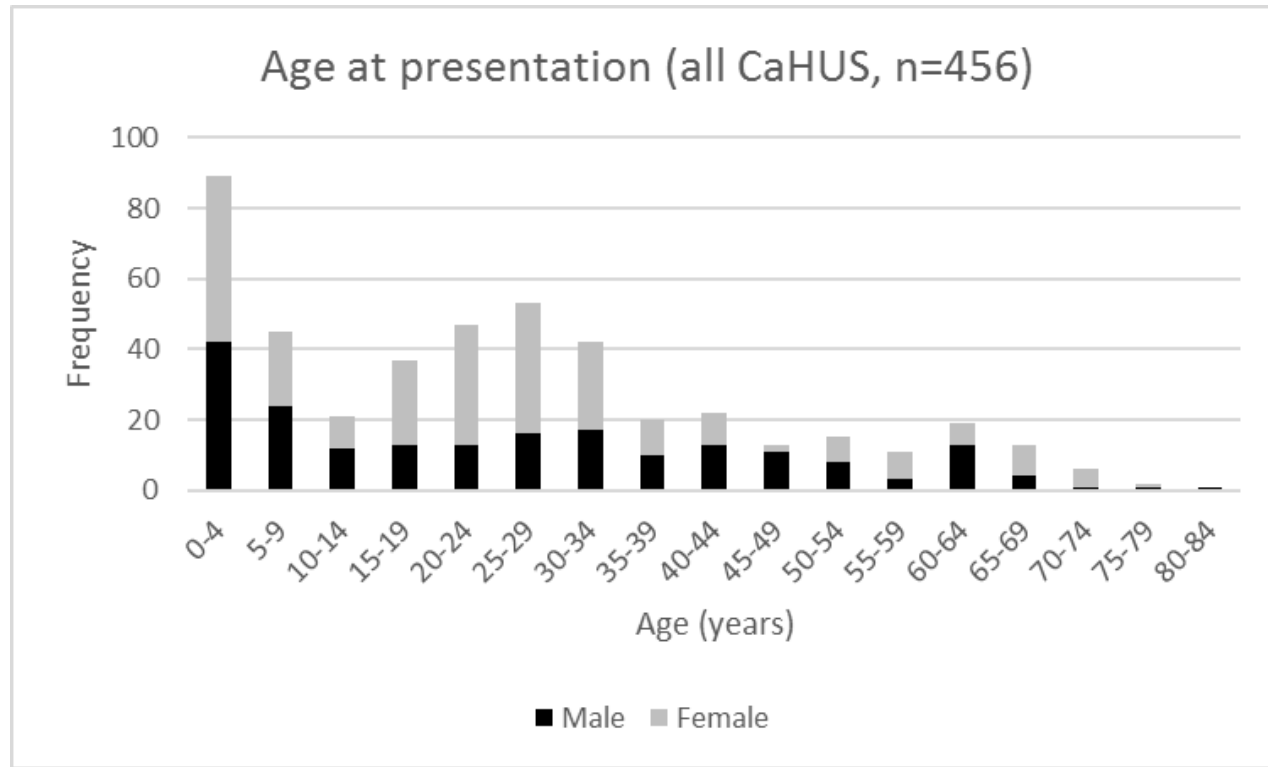

B

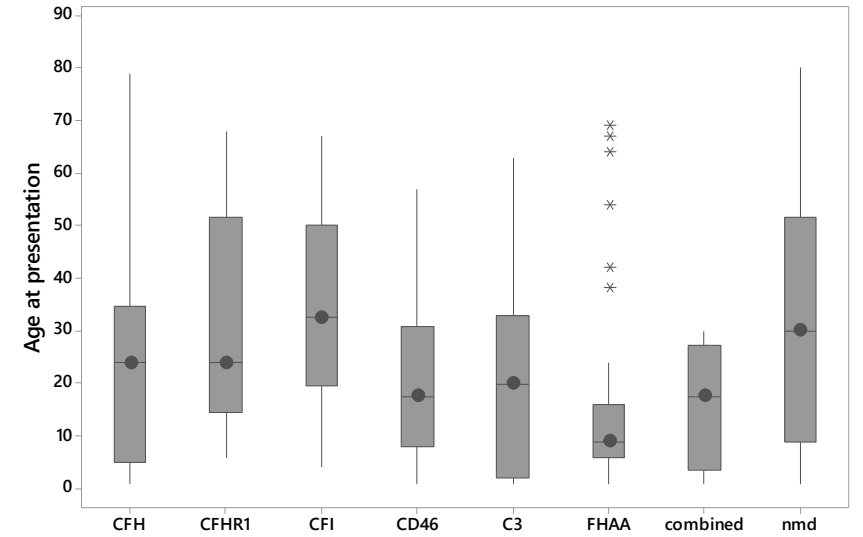

After applying the Bonferroni multiple comparisons there is a difference in age at presentation between the FHAA group and the no mutation group ( $p=0.001$ ) and between the FHAA group and the *CFI* group ( $p=0.008$ ) at the table-wide 0.05 level.

eFigure 4

C

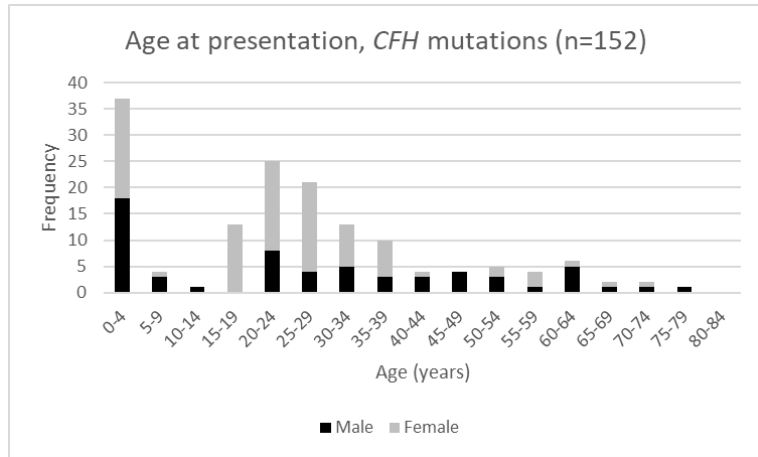

D

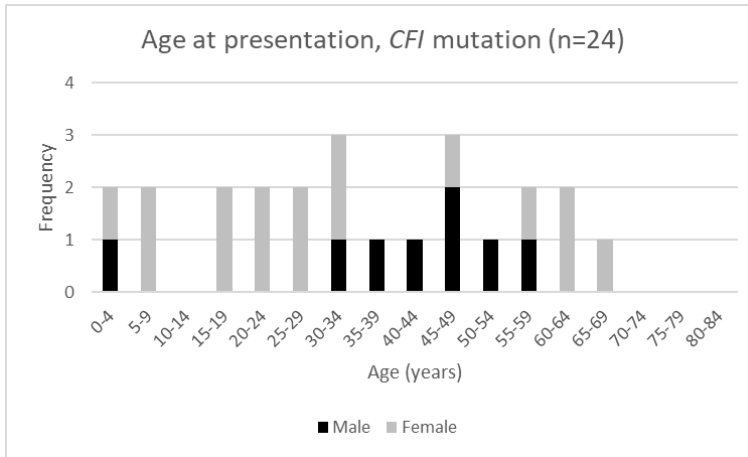

F

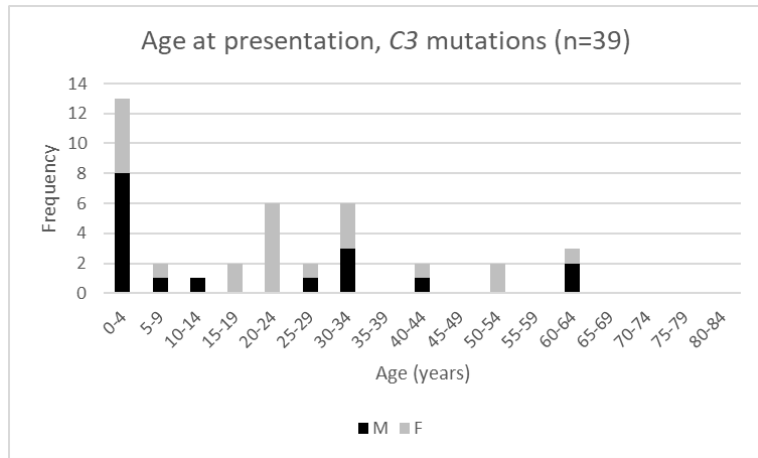

G

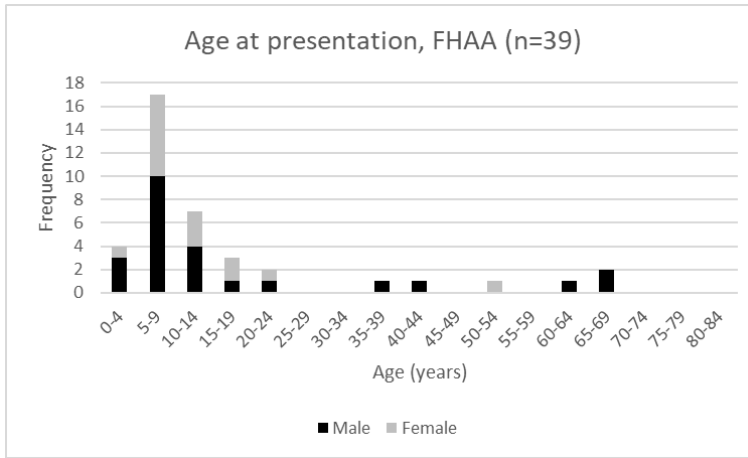

E

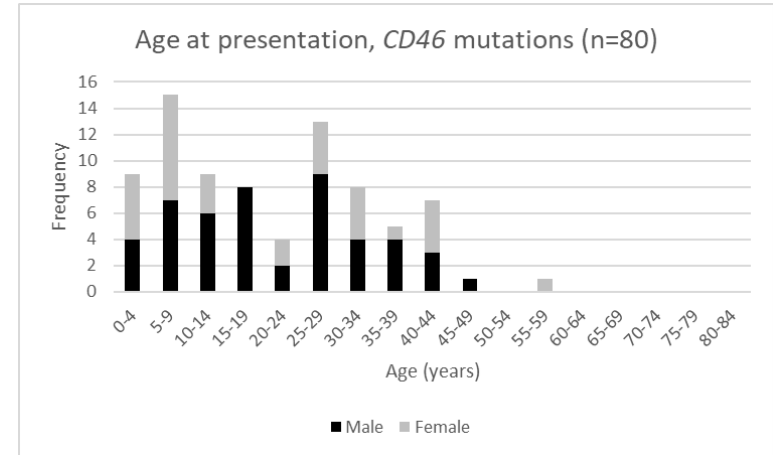

H

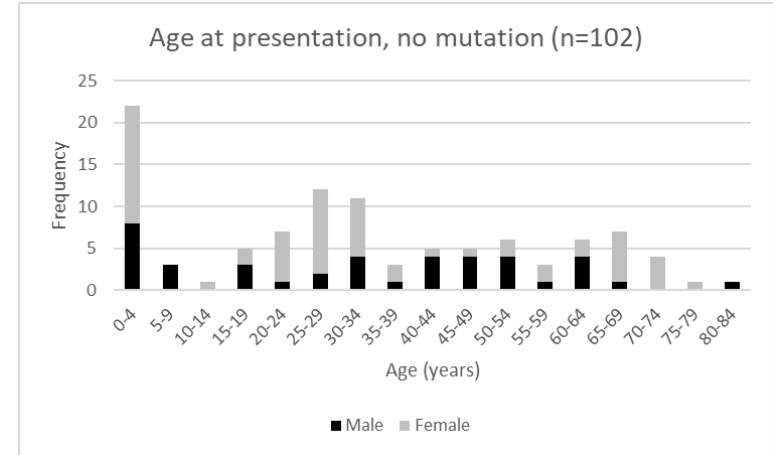

I

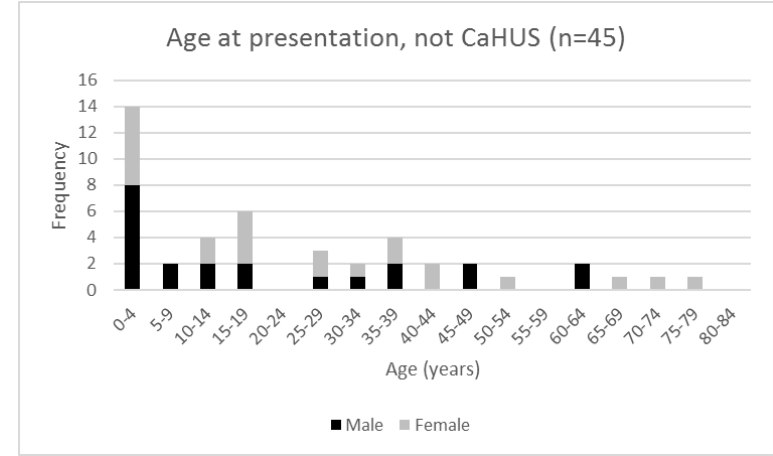

J

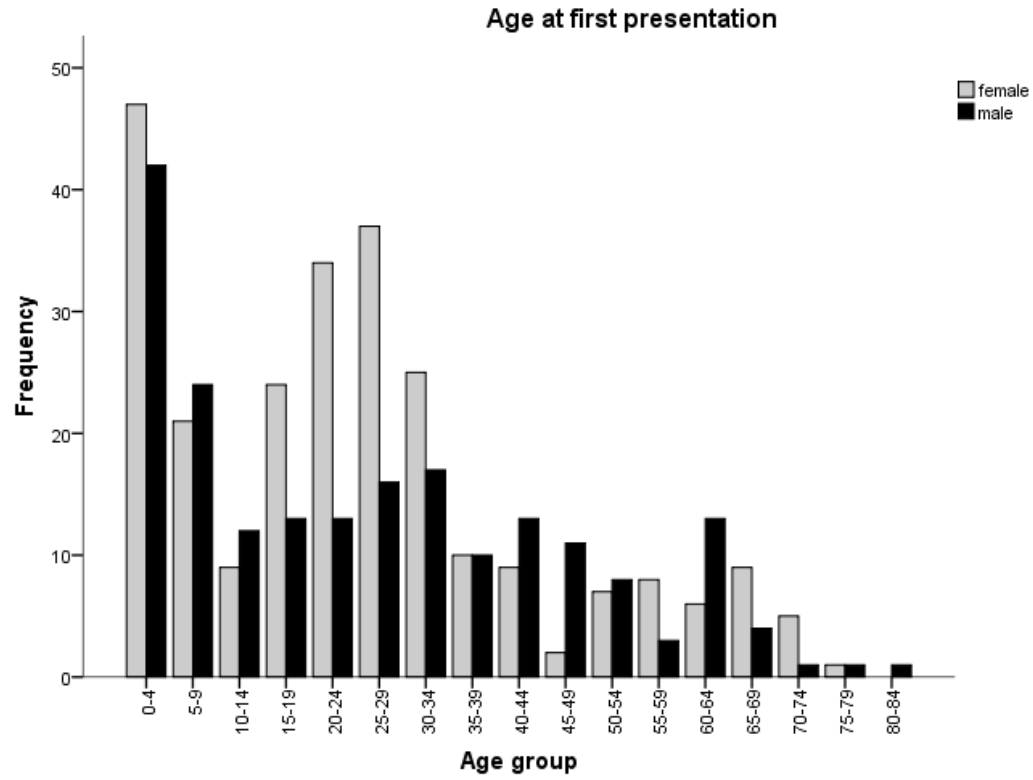

Pearson Chi-Square p=0.003

K

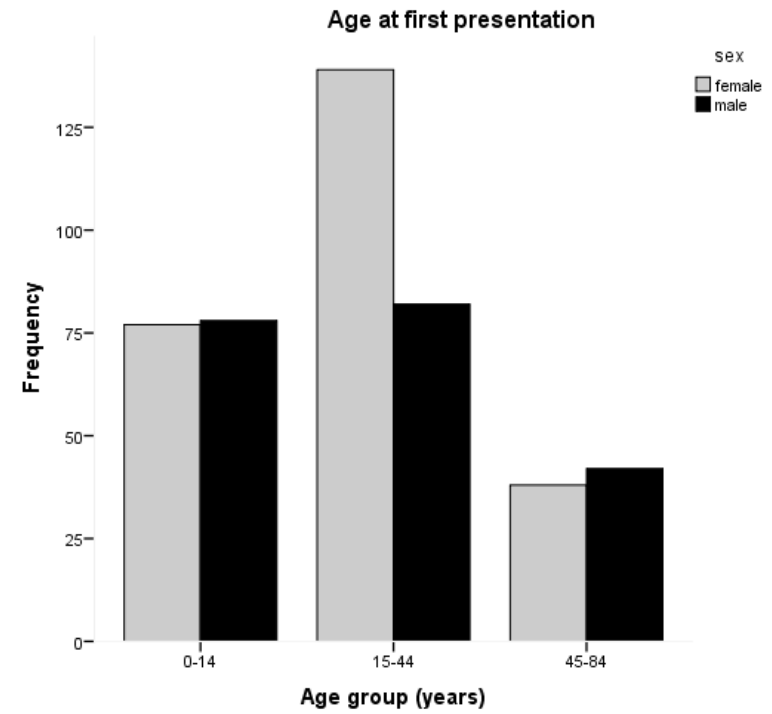

Pearson Chi-Square p=0.011

eFigure 5

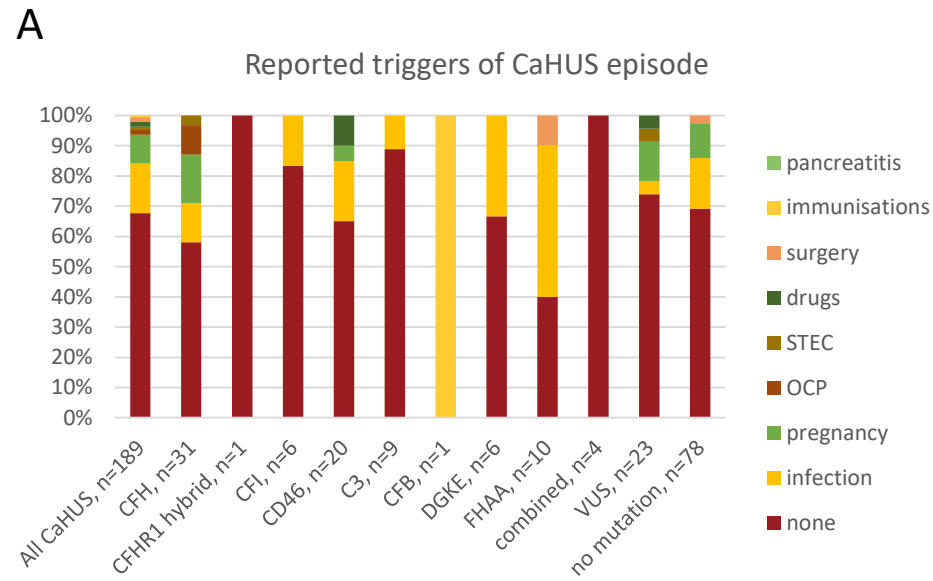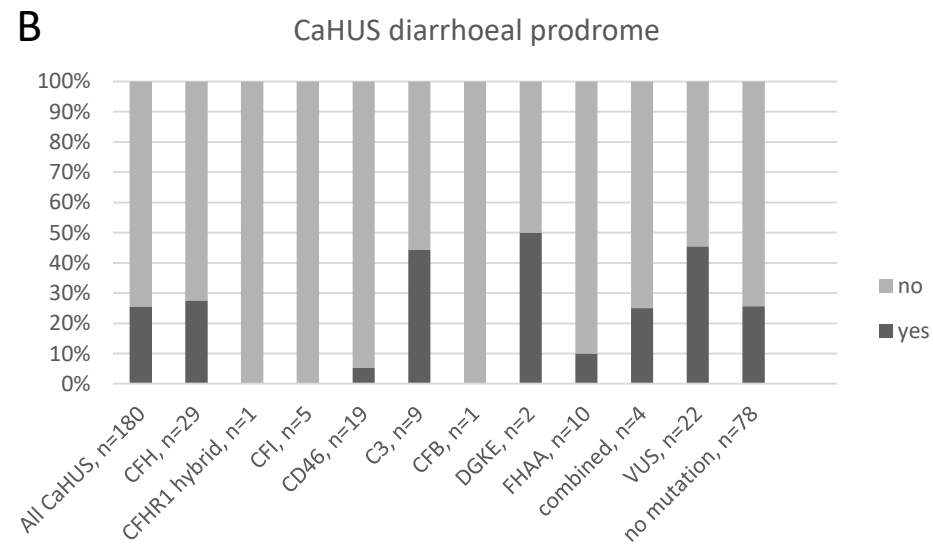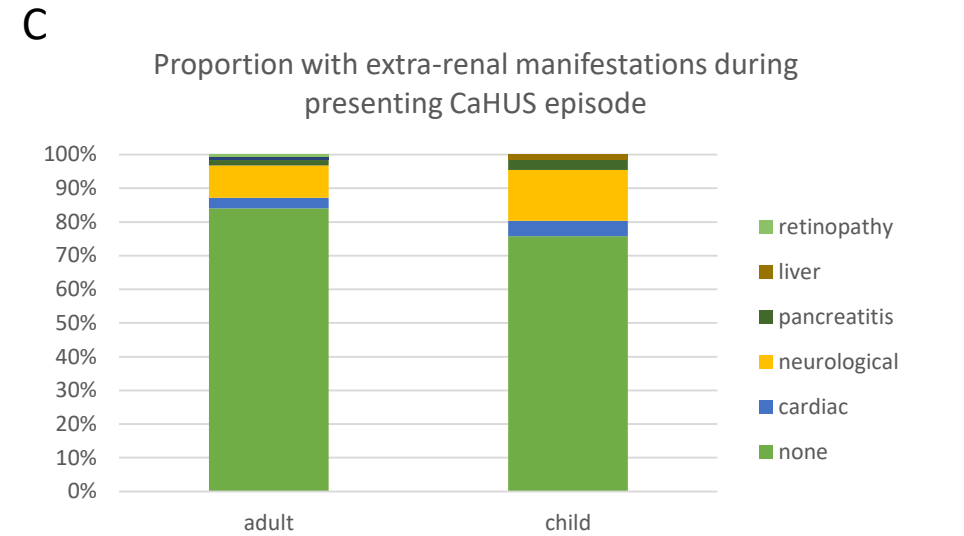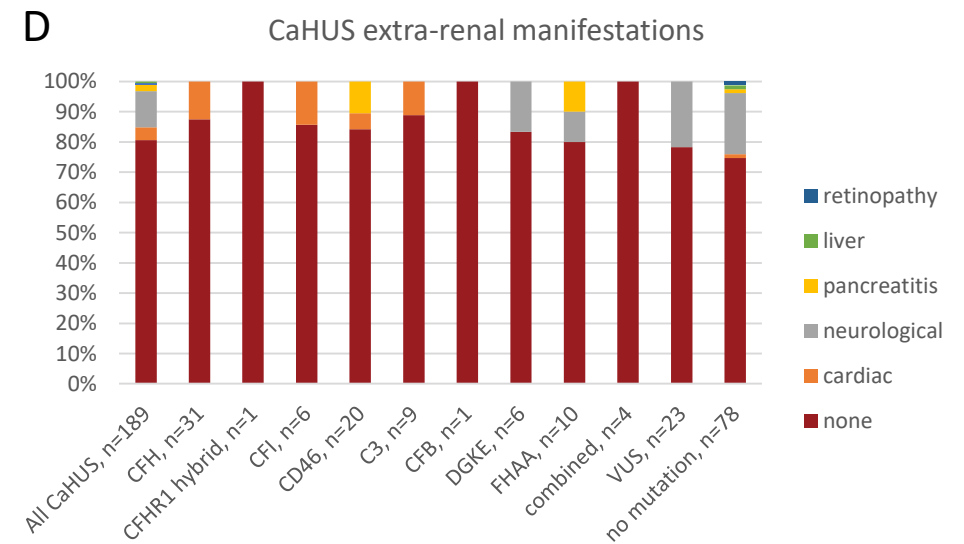

eFigure 5

E

Prodromal symptoms or circumstances in adults

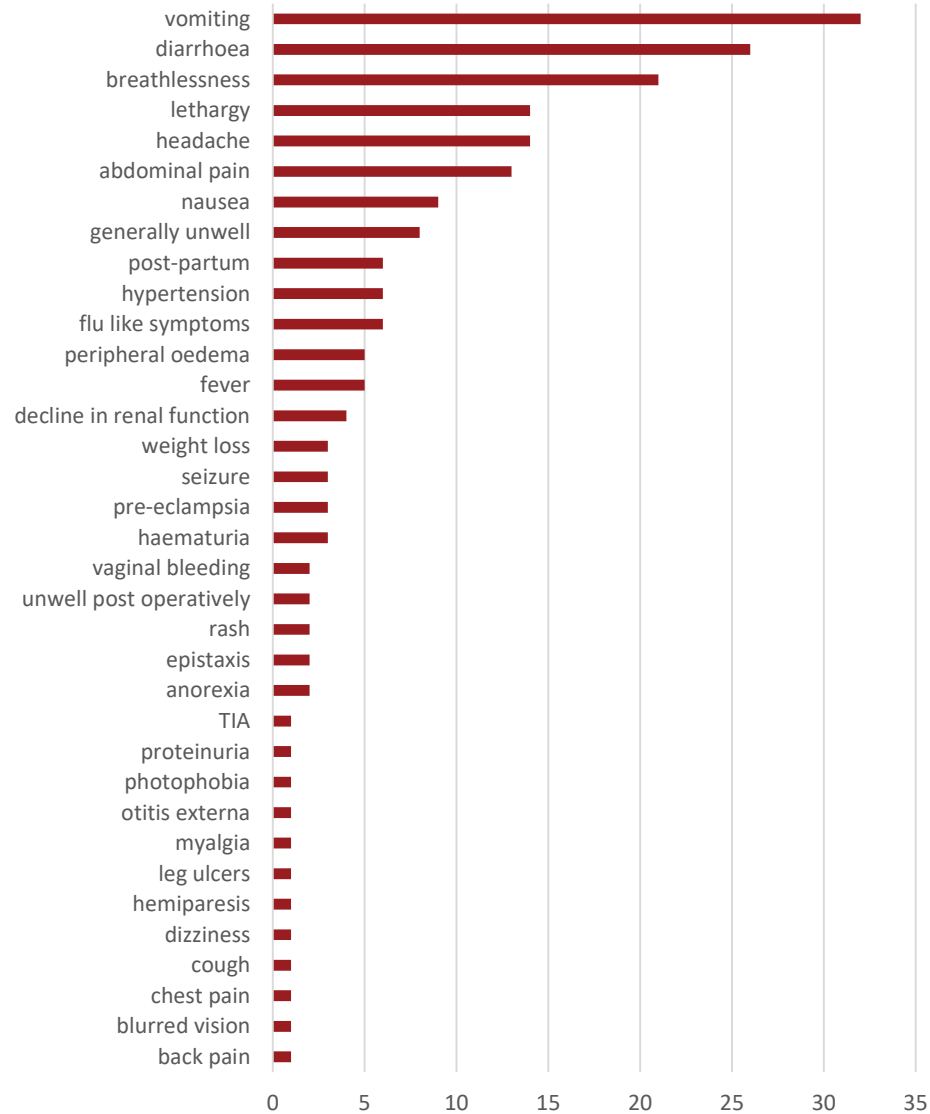

F

Prodromal symptoms or circumstances in children

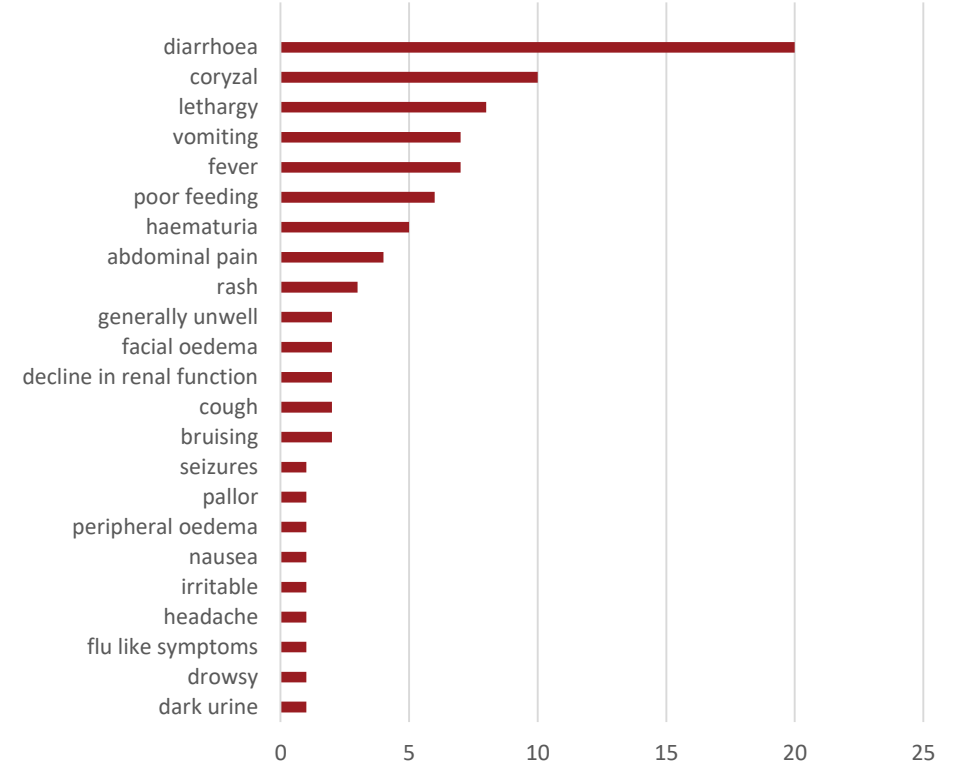

eFigure 5

G

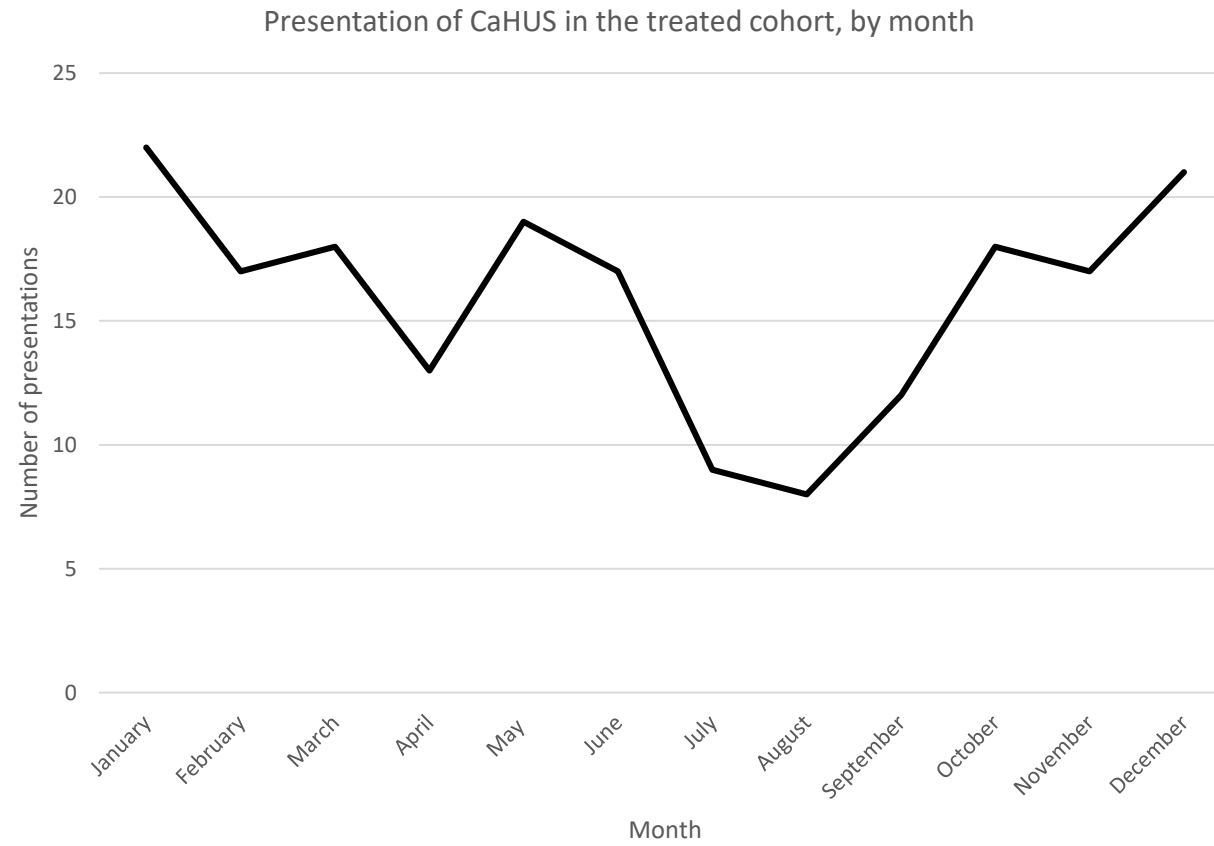



# eFigure 6

## A. Treated group vs Control CaHUS

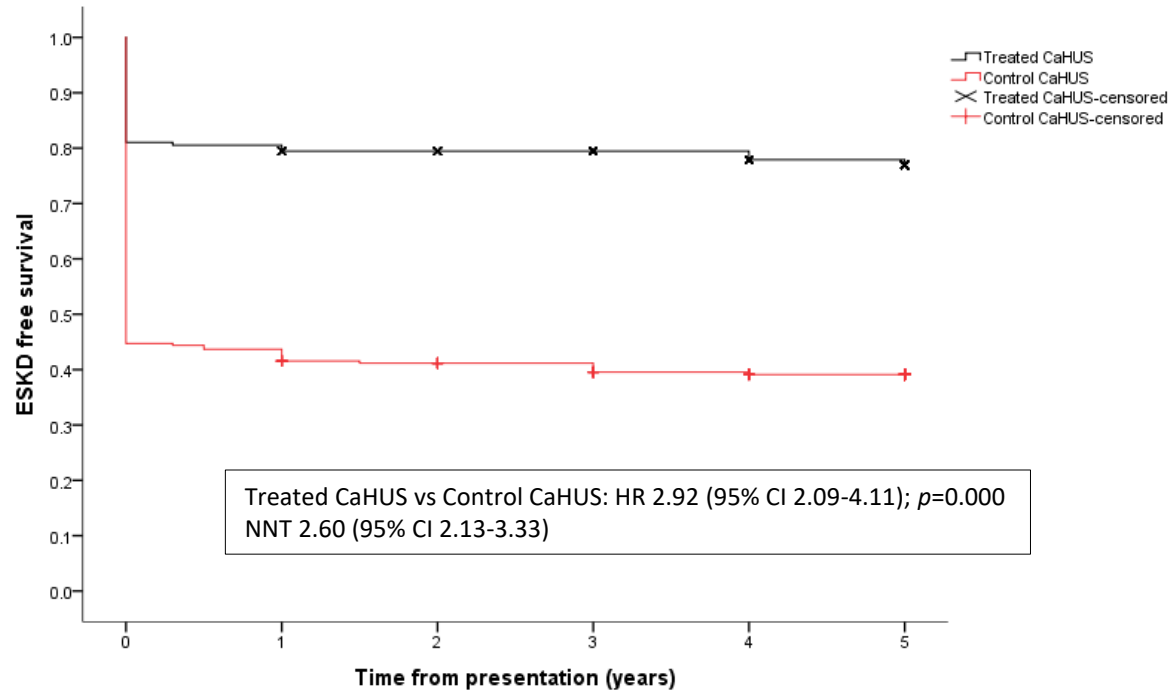

| Number at risk |     | 0   | 1   | 2   | 3   | 4  | 5 |
|----------------|-----|-----|-----|-----|-----|----|---|
| Treated        | 190 | 153 | 137 | 123 | 101 | 83 |   |
| Control        | 284 | 124 | 109 | 101 | 90  | 79 |   |

## B. Treated group vs Control CaHUS Children vs Adults

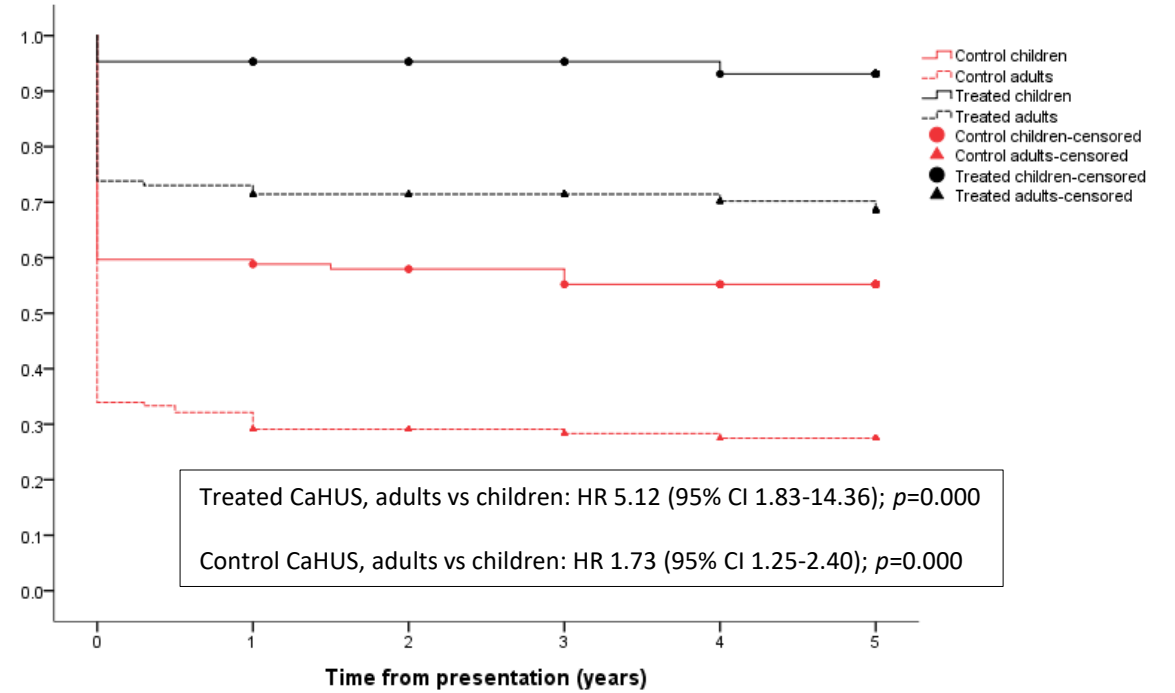

| Number at risk   |     | 0  | 1  | 2  | 3  | 4  | 5 |
|------------------|-----|----|----|----|----|----|---|
| Treated children | 64  | 61 | 55 | 49 | 43 | 40 |   |
| Treated adults   | 126 | 92 | 82 | 74 | 58 | 43 |   |
| Control children | 119 | 71 | 66 | 63 | 57 | 49 |   |
| Control adults   | 165 | 53 | 43 | 38 | 33 | 30 |   |

When comparing the control CaHUS cohort with the treated CaHUS cohort (including those without a mutation or FHAA) five-year cumulative estimate (Kaplan-Meier) of ESKD free survival was 39.5% vs 78%; HR 2.92 (95% CI 2.09-4.11),  $p=0.000$ , NNT 2.60 (95% CI 2.13-3.33) (eFigure 6A) ESKD free survival was worse in individuals presenting for the first time as adults than those presenting in childhood; in those with CaHUS with our without mutations or autoantibody for adults vs children in the control group HR was 1.73 (95% CI 1.25-2.40),  $p=0.000$  and 5.12 (95% CI 1.83-14.36),  $p=0.013$  in the treated group.

# eFigure 6

C. Treated CaHUS with mutation or FHAA vs control CaHUS, by sex and age group

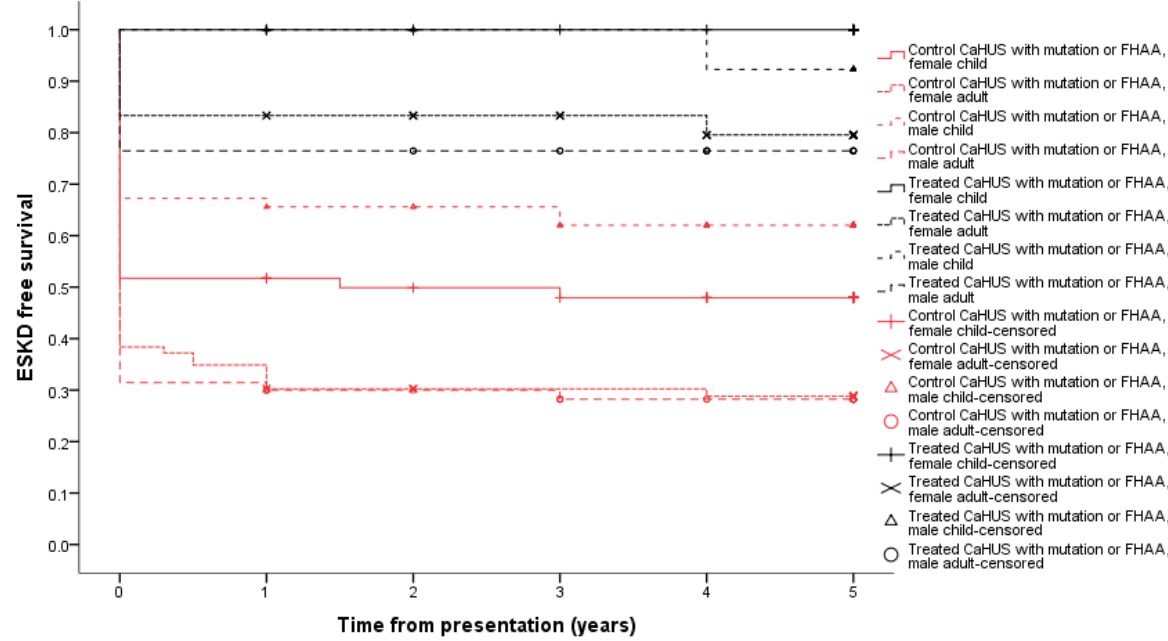

D. Treated CaHUS vs Control CaHUS, by sex and age group

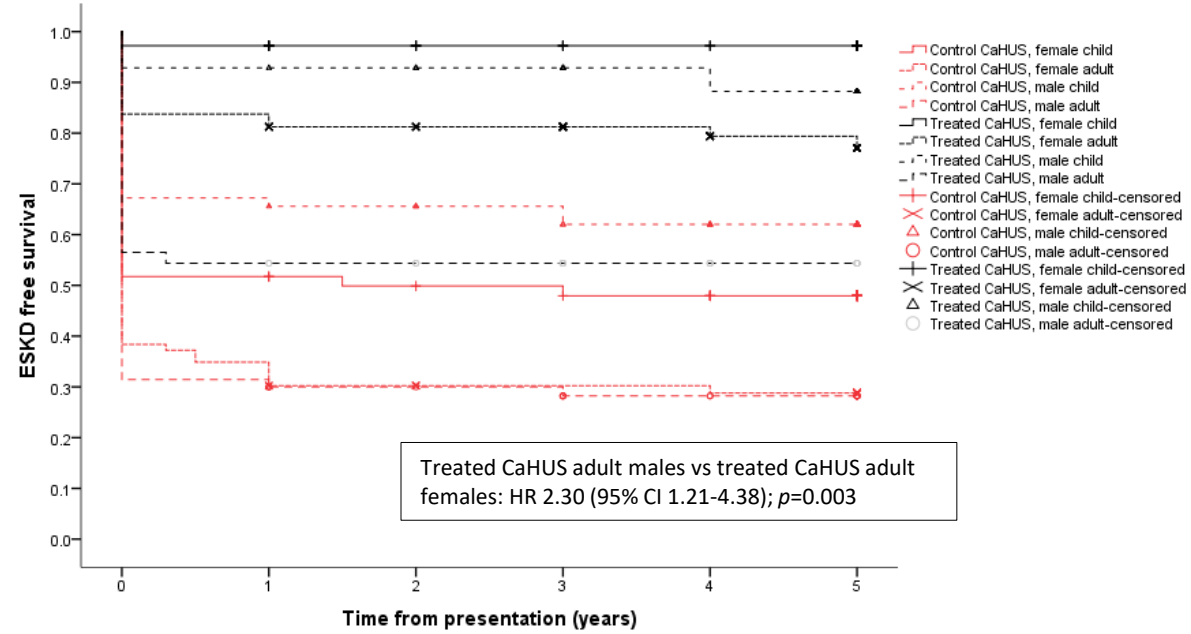

| Number at risk       | 0  | 1  | 2  | 3  | 4  | 5  |
|----------------------|----|----|----|----|----|----|
| Treated female child | 20 | 20 | 17 | 14 | 13 | 12 |
| Treated female adult | 36 | 30 | 28 | 25 | 22 | 17 |
| Treated male child   | 16 | 16 | 15 | 13 | 13 | 12 |
| Treated male adult   | 17 | 13 | 13 | 11 | 9  | 5  |
| Control female child | 58 | 30 | 27 | 26 | 24 | 20 |
| Control female adult | 86 | 30 | 24 | 21 | 21 | 20 |
| Control male child   | 61 | 41 | 39 | 37 | 33 | 29 |
| Control male adult   | 70 | 22 | 18 | 17 | 12 | 10 |

| Number at risk       | 0  | 1  | 2  | 3  | 4  | 5  |
|----------------------|----|----|----|----|----|----|
| Treated female child | 36 | 35 | 30 | 26 | 23 | 21 |
| Treated female adult | 80 | 67 | 59 | 54 | 44 | 34 |
| Treated male child   | 28 | 26 | 25 | 23 | 20 | 19 |
| Treated male adult   | 46 | 25 | 23 | 20 | 14 | 9  |
| Control female child | 58 | 30 | 27 | 26 | 24 | 20 |
| Control female adult | 86 | 30 | 24 | 21 | 21 | 20 |
| Control male child   | 61 | 41 | 39 | 37 | 33 | 29 |
| Control male adult   | 70 | 22 | 18 | 17 | 12 | 10 |

The five-year cumulative estimate (Kaplan-Meier) of ESKD free survival also varied depending on sex and age, though the only significant difference was seen when the entire CaHUS cohort was analysed: treated adult males had a worse prognosis than treated adult females; HR 2.30 (95% CI 1.21-4.38);  $p=0.003$

# eFigure 6E

## ESKD free survival: *CFH* mutations, by type, treated vs control

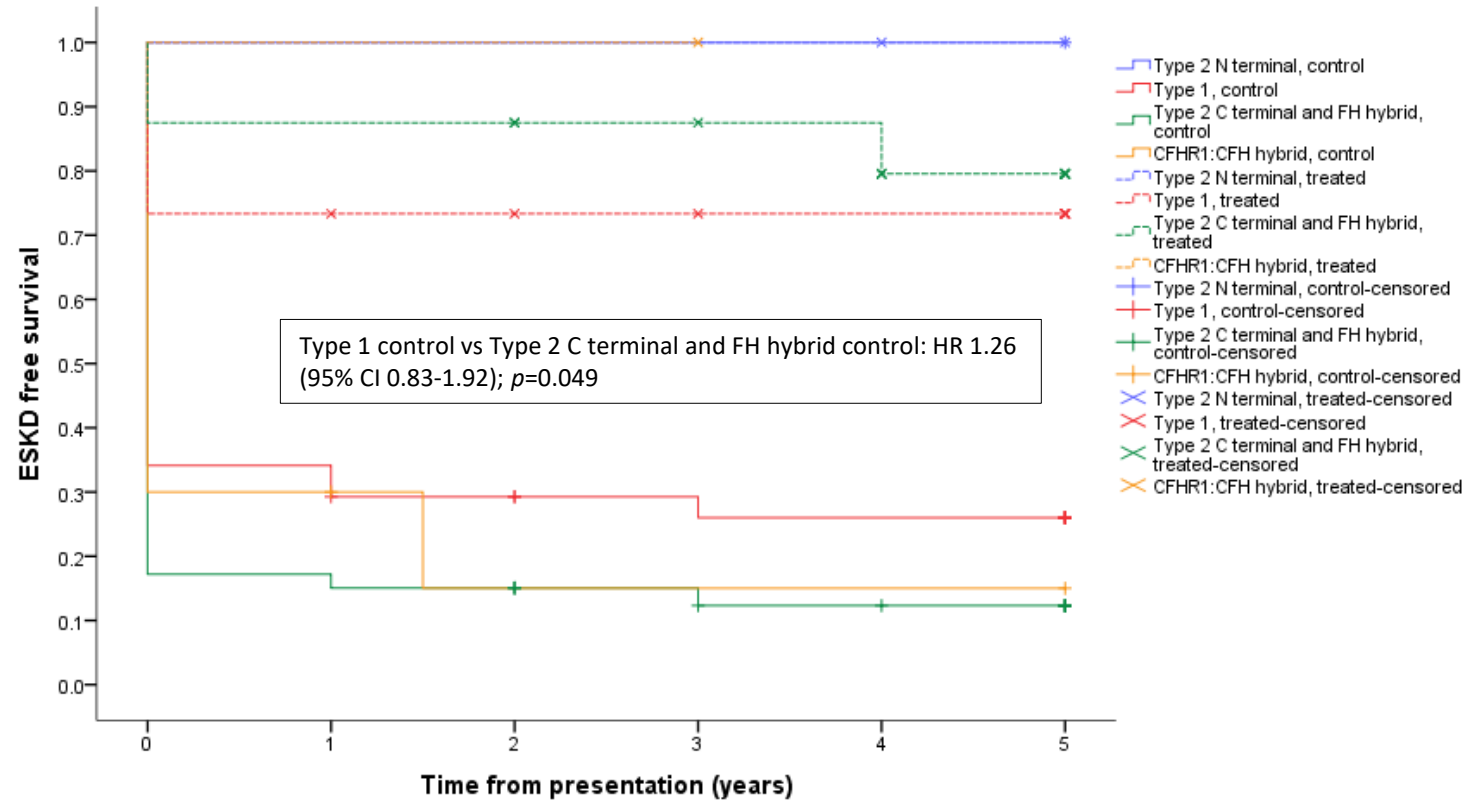

### Number at risk

|                                          |    |    |    |    |   |   |
|------------------------------------------|----|----|----|----|---|---|
| Type 2 N terminal, control               | 1  | 1  | 1  | 1  | 1 | 1 |
| Type 1, control                          | 41 | 14 | 11 | 9  | 9 | 8 |
| Type 2 C terminal and FH hybrid, control | 93 | 16 | 14 | 11 | 8 | 7 |
| CFHR1:CFH hybrid, control                | 10 | 3  | 1  | 1  | 1 | 1 |
| Type 2 N terminal, treated               | 1  | 1  | 1  | 1  | 1 | 1 |
| Type 1, treated                          | 15 | 11 | 10 | 9  | 8 | 8 |
| Type 2 C terminal and FH hybrid, treated | 11 | 10 | 10 | 8  | 8 | 5 |
| CFHR1:CFH hybrid, treated                | 1  | 1  | 1  | 1  | 0 | 0 |

# eFigure 6F

## ESKD free survival: CFI, treated vs control

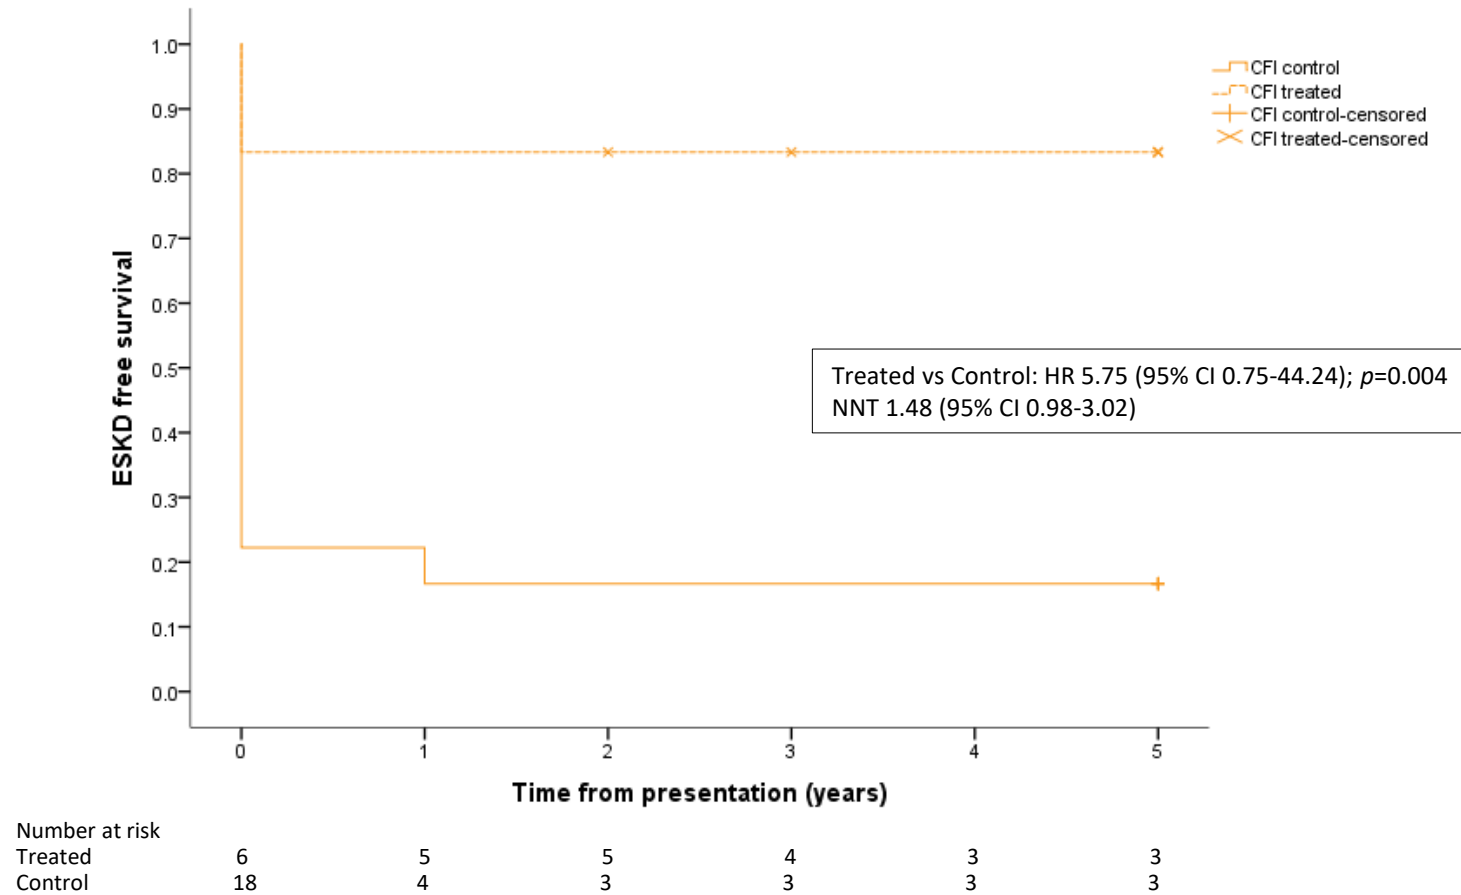

# eFigure 6G

## ESKD free survival: C3, treated vs control

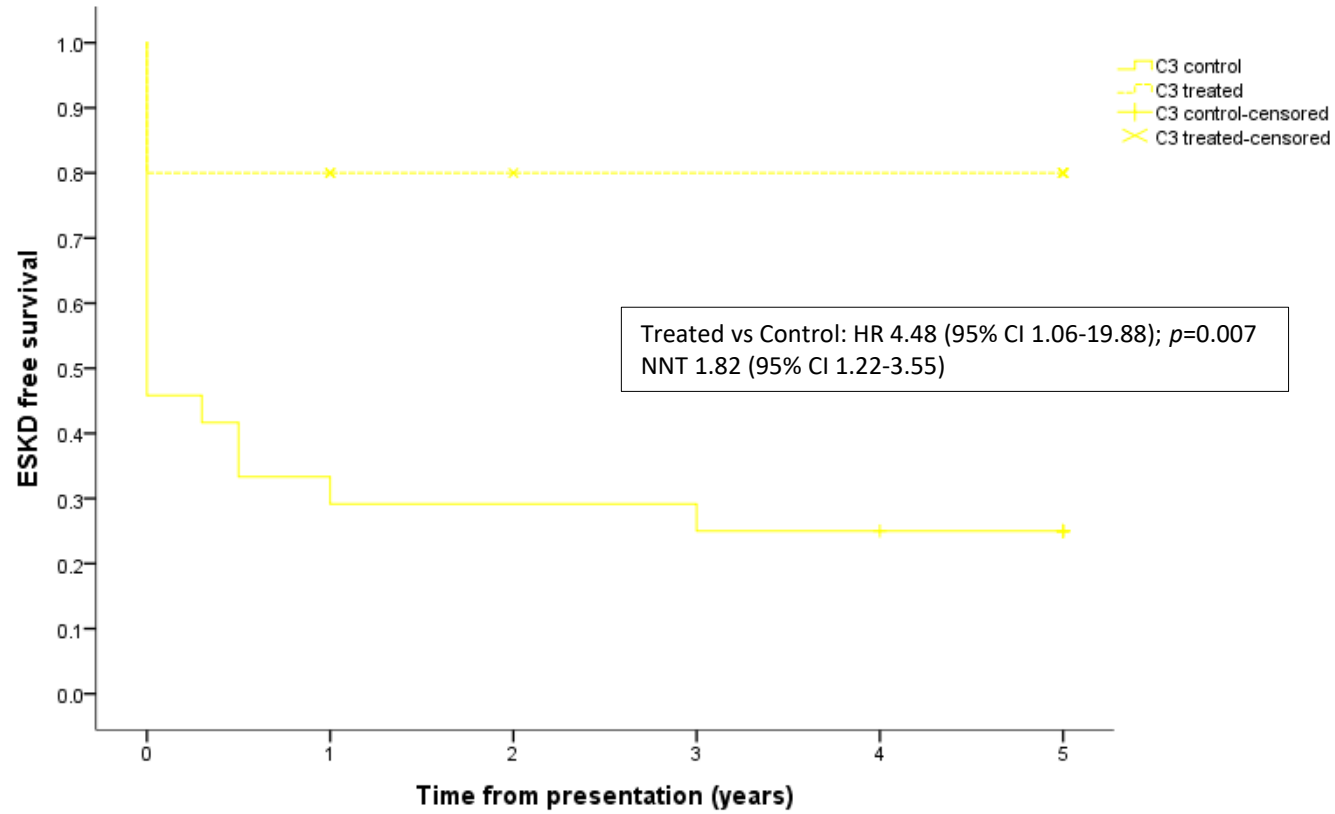

| Number at risk | 0  | 1 | 2 | 3 | 4 | 5 |
|----------------|----|---|---|---|---|---|
| Treated        | 10 | 8 | 6 | 5 | 5 | 5 |
| Control        | 24 | 8 | 7 | 7 | 6 | 5 |

# eFigure 6

## ESKD free survival: FHAA, treated vs control

### H. 5-year

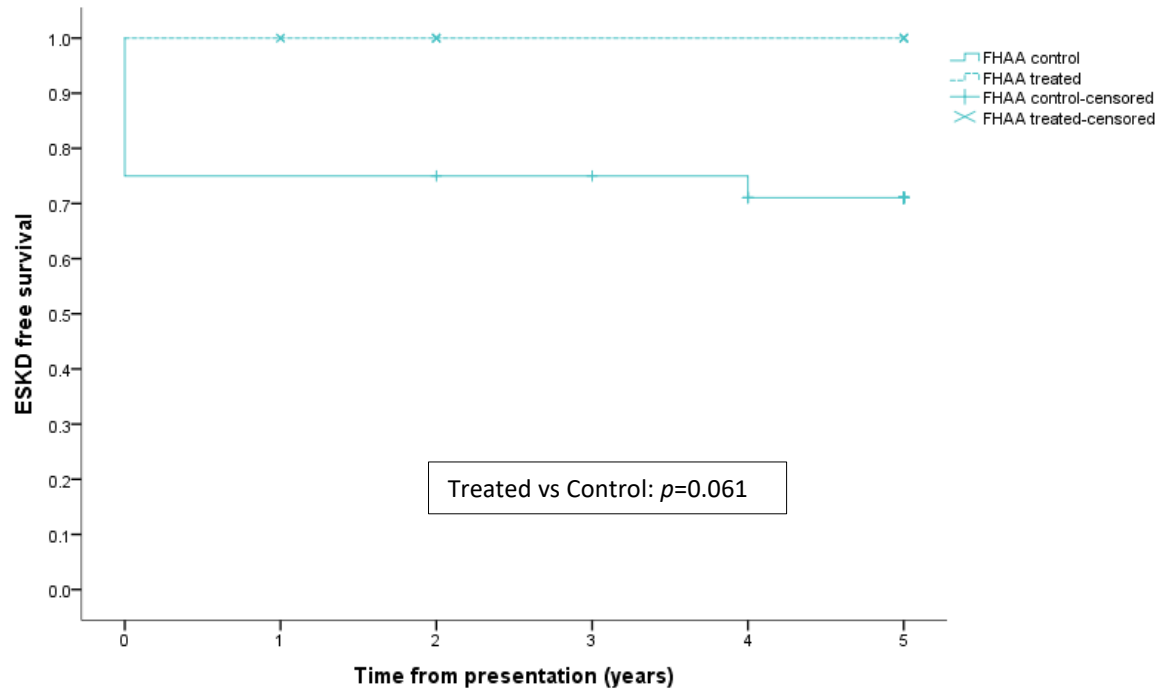

| Number at risk | 0  | 1  | 2  | 3  | 4  | 5  |
|----------------|----|----|----|----|----|----|
| Treated        | 10 | 10 | 8  | 4  | 4  | 4  |
| Control        | 28 | 21 | 21 | 20 | 19 | 15 |

### I. Uncensored

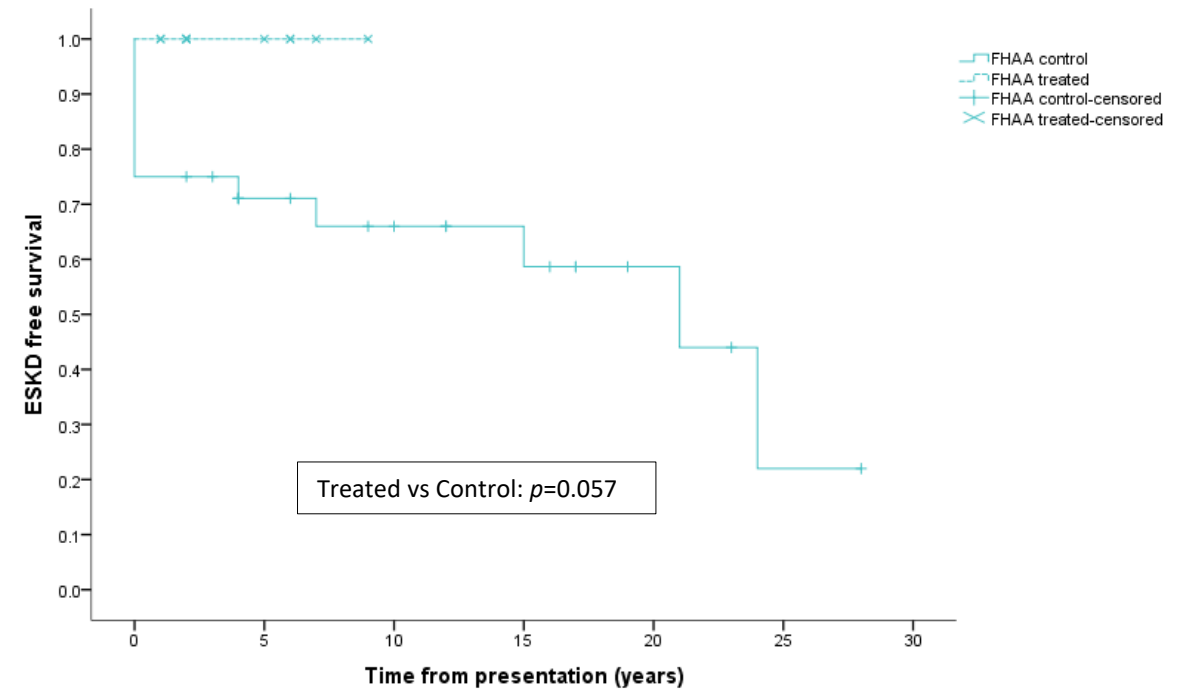

eFigure 7

|                                                     |    |              | Albuminuria category, mg/mmol |          |        |          |
|-----------------------------------------------------|----|--------------|-------------------------------|----------|--------|----------|
|                                                     |    |              | A1                            | A2       | A3     | Unknown  |
|                                                     |    |              | <3                            | 3-30     | >30    |          |
| eGFR categories<br>(ml/min per 1.73m <sup>2</sup> ) | 1  | >90          | 23 (15%)                      | 21 (14%) | 5 (3%) | 3 (2%)   |
|                                                     | 2  | 60-89        | 12 (8%)                       | 6 (4%)   | 7 (5%) | 5 (3%)   |
|                                                     | 3a | 45-59        | 2 (1%)                        | 4 (3%)   | 5 (3%) | 3 (2%)   |
|                                                     | 3b | 30-44        | 2 (1%)                        | 4 (3%)   | 3 (2%) | 0        |
|                                                     | 4  | 15-29        | 0                             | 4 (3%)   | 4 (3%) | 2 (1%)   |
|                                                     | 5  | <15          | 0                             | 0        | 2 (1%) | 1 (0.5%) |
|                                                     | 5D | On dialysis  | n/a                           | n/a      | n/a    | 23 (14%) |
|                                                     | 5T | Transplanted | n/a                           | n/a      | n/a    | 12 (8%)  |

# eFigure 8

A

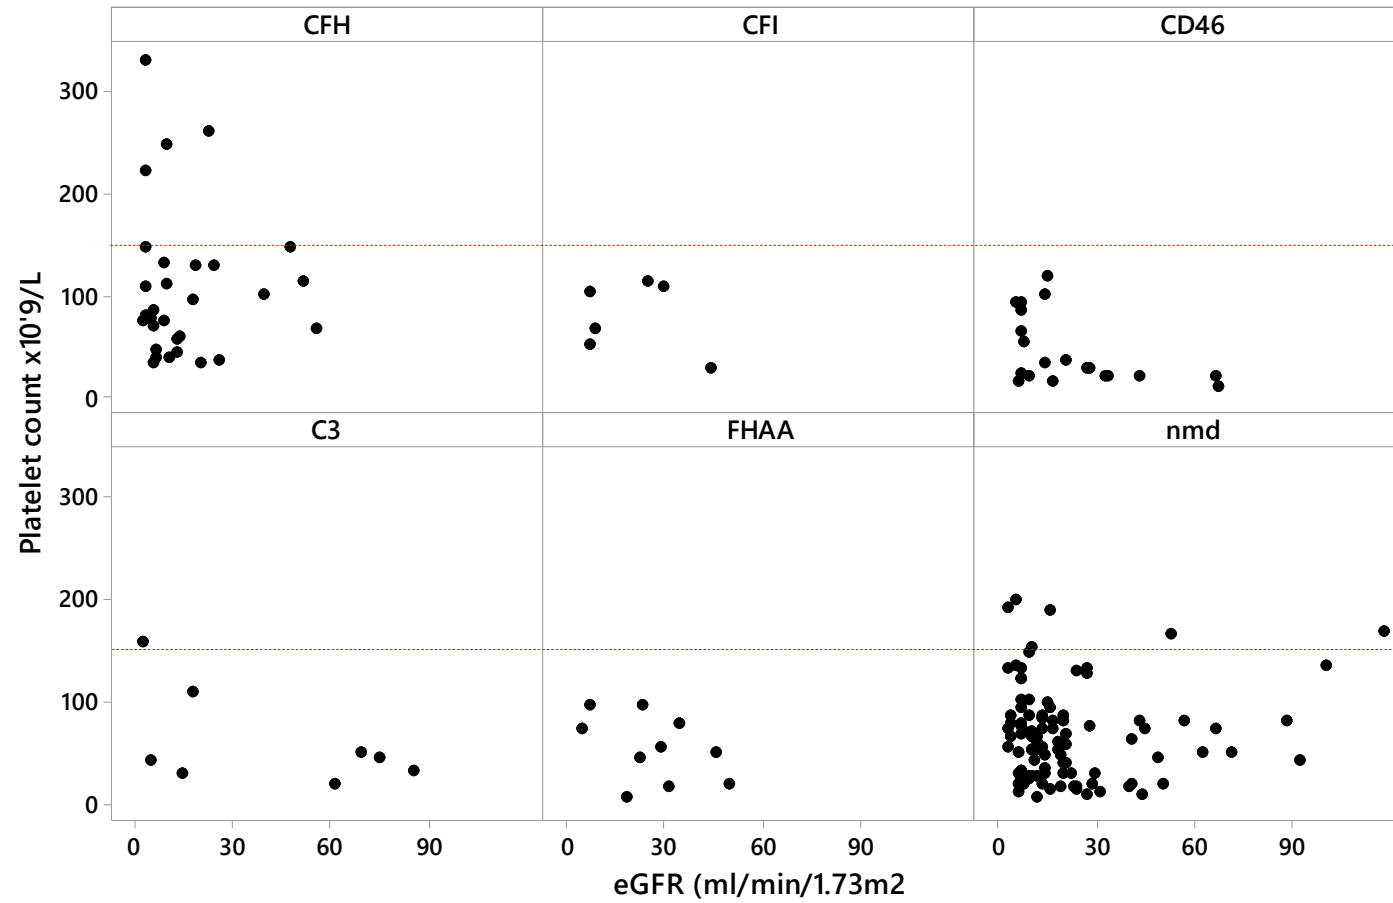



# eFigure 8

**B**

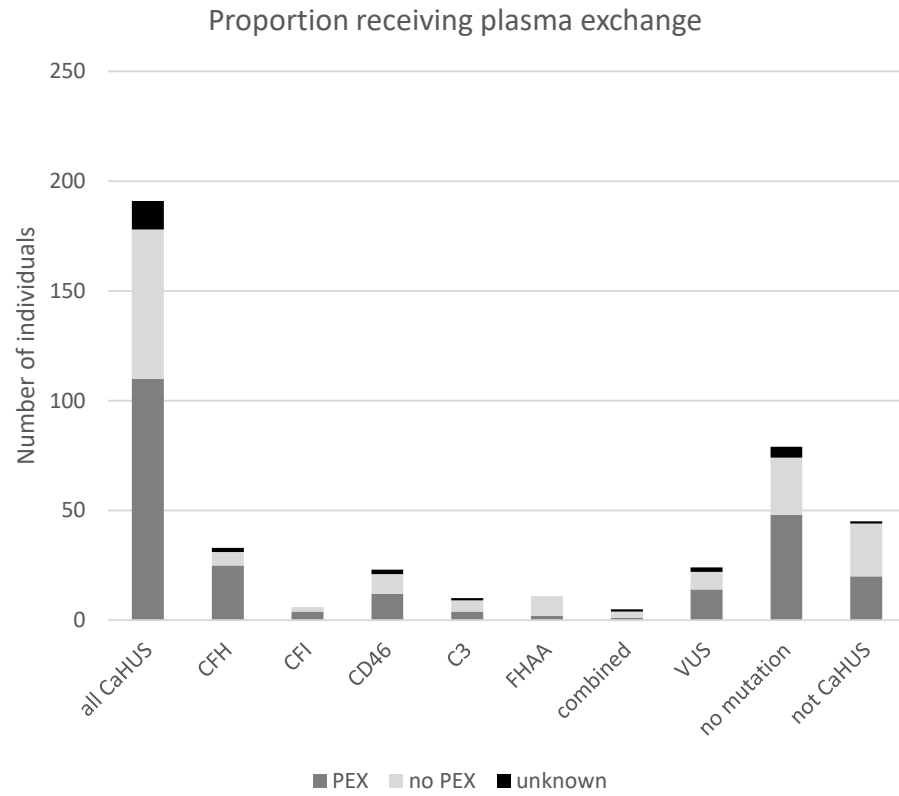

**C**

Haematological response to eculizumab in 71 individuals who did not receive plasma exchange prior to starting eculizumab

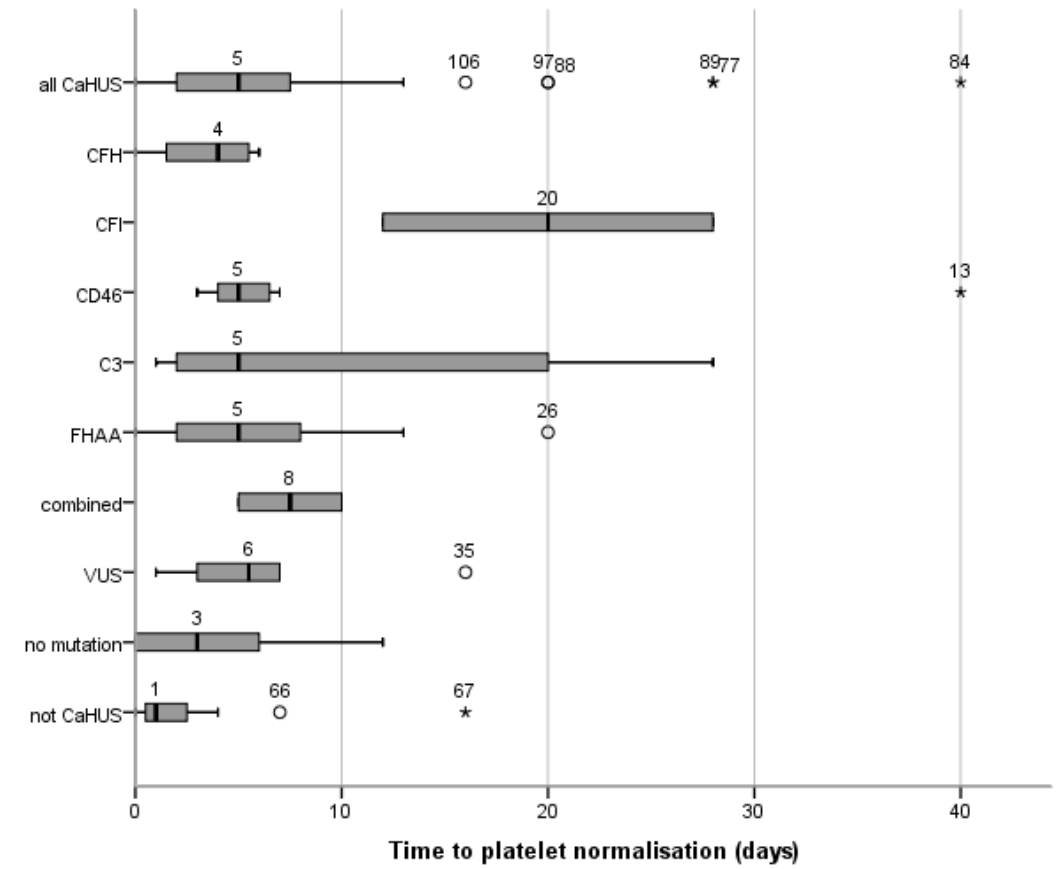

## Figure 9: Multivariate analysis using logistic regression model

### A. On dialysis at 6 months

|                                                  | UNIVARIATE           |         | MULTIPLE             |         |
|--------------------------------------------------|----------------------|---------|----------------------|---------|
| <b>All individuals with treated CaHUS, n=173</b> |                      |         |                      |         |
| Risk Factor                                      | Odds ratio           | p value | Odds ratio           | p value |
| Platelets                                        | 1.010 [1.003, 1.016] | 0.004   | 1.010[1.002, 1.017]  | 0.001   |
| Creatinine                                       | 1.001 [1.001, 1.002] | 0.0004  | 1.001[1.00, 1.002]   | 0.07    |
| Age at presentation                              | 1.041 [1.022, 1.060] | <0.001  | 1.043[1.022, 1.064]  | <0.001  |
| <b>Systolic BP sub-group, n=88</b>               |                      |         |                      |         |
| Risk Factor                                      | Odds ratio           | p value | Odds ratio           | p value |
| Systolic BP                                      | 1.016 [1.002, 1.029] | 0.024   | 1.014[0.999, 1.028]  | 0.06    |
| Platelets                                        | 1.012 [1.002, 1.021] | 0.013   | 1.014 [1.004, 1.023] | 0.007   |
| Age at presentation                              | 1.028 [1.002, 1.057] | 0.034   | 1.036[1.005, 1.068]  | 0.02    |

An increase of one unit on each of the above variables lead to an increase in the odds ratio of being on dialysis at 6 months (either in the univariate or multiple analysis).

## B. eGFR >60ml/min/1.73m<sup>2</sup> at 6 months

|                                                  | UNIVARIATE           |         | MULTIPLE             |         |
|--------------------------------------------------|----------------------|---------|----------------------|---------|
| <b>All treated individuals with CaHUS, n=173</b> |                      |         |                      |         |
| Risk Factor                                      | Odds ratio           | p value | Odds ratio           | p value |
| Presentation to ECU                              | 1.00 [0.999, 1.001]  | 0.5     | 0.998 [0.997,1.00]   | 0.022   |
| Platelets                                        | 0.984 [0.977, 0.992] | <0.0001 | 0.983[0.974, 0.993]  | 0.001   |
| Creatinine                                       | 0.997 [0.996, 0.998] | <0.0001 | 0.998[0.996, 0.999]  | 0.002   |
| Age at presentation                              | 0.934 [0.914, 0.954] | <0.0001 | 0.934[0.912, 0.956]  | <0.001  |
| <b>Systolic BP sub-group, n=88</b>               |                      |         |                      |         |
| Risk Factor                                      | Odds ratio           | p value | Odds ratio           | p value |
| Systolic BP                                      | 0.953 [0.930, 0.976] | <0.0001 | 0.945 [0.915,0.976]  | 0.001   |
| Presentation to ECU                              | 0.941 [0.891, 0.995] | 0.031   | 0.934 [0.885,0.986]  | 0.013   |
| Platelets                                        | 0.962 [0.944, 0.981] | <0.0001 | 0.955 [0.929, 0.981] | 0.001   |
| Age at presentation                              | 0.940 [0.903, 0.978] | 0.002   | 0.94[0.89, 0.993]    | 0.03    |

An increase of one unit on each of the above variables lead to a reduction in the odds of having eGFR>60ml/min/1.73m<sup>2</sup> at 6 months (either in the univariate or multiple analysis).

## C. Renal response at 6 months

|                                                  | UNIVARIATE           |         | MULTIPLE             |         |
|--------------------------------------------------|----------------------|---------|----------------------|---------|
| <b>All treated individuals with CaHUS, n=173</b> |                      |         |                      |         |
| Risk Factor                                      | Odds ratio           | P value | Odds ratio           | P value |
| Platelets                                        | 0.987 [0.980, 0.994] | 0.0002  | 0.985[0.978, 0.993]  | <0.001  |
| Age at presentation                              | 0.968 [0.952, 0.984] | <0.0001 | 0.963[0.946, 0.980]  | <0.001  |
| <b>Systolic BP sub-group, n=88</b>               |                      |         |                      |         |
| Risk Factor                                      | Odds ratio           | P value | Odds ratio           | P value |
| Systolic BP                                      | 0.984 [0.971, 0.997] | 0.02    | 0.986 [0.972,1.00]   | 0.054   |
| Platelets                                        | 0.989 [0.980, 0.998] | 0.014   | 0.987 [0.978, 0.997] | 0.001   |
| Age at presentation                              | 0.974 [0.949, 1.00]  | 0.054   | 0.97[0.942, 0.999]   | 0.001   |

An increase of one unit on each of the above variables lead to a reduction in the odds ratio of having a renal at 6 months (either in the univariate or multiple analysis).

# eFigure 10

Time on  
eculizumab  
(years)

<1

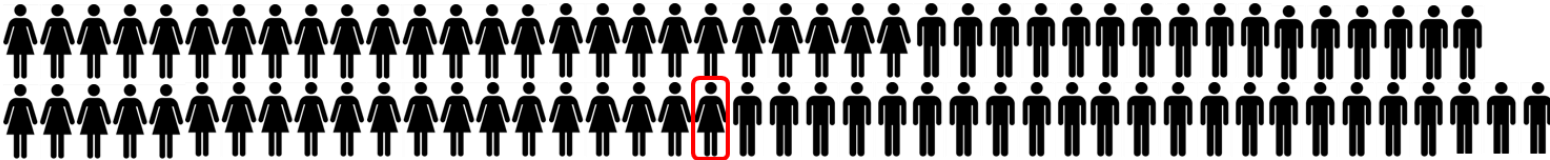

1

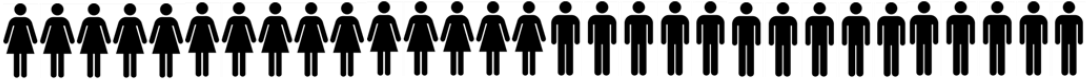

2

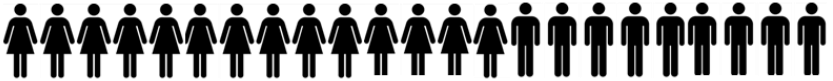

3

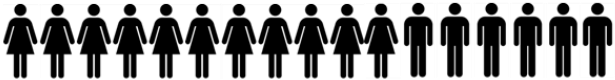

4

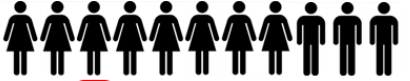

5

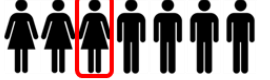

6

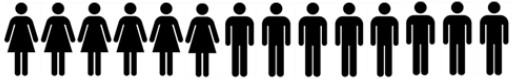

7

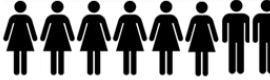

8

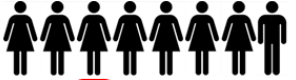

9

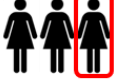

10

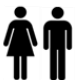

Incidence of meningococcal infection  
= 0.0055 per person year  
= 550 per 100,000

Public Health England data for 2018-2019:  
Incidence of meningococcal infection  
= 1 per 100,000

Age

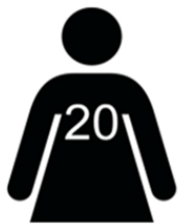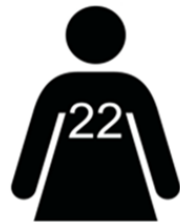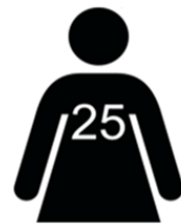

Serogroup

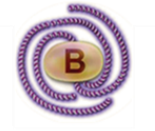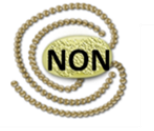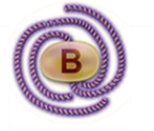

Penicillin  
Resistant

Antibiotic  
Compliance

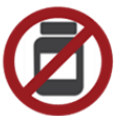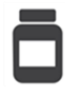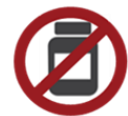

Years on  
eculizumab

<1

5

9

All vaccinated against ACWYB

# eFigure 11

## Patient 1

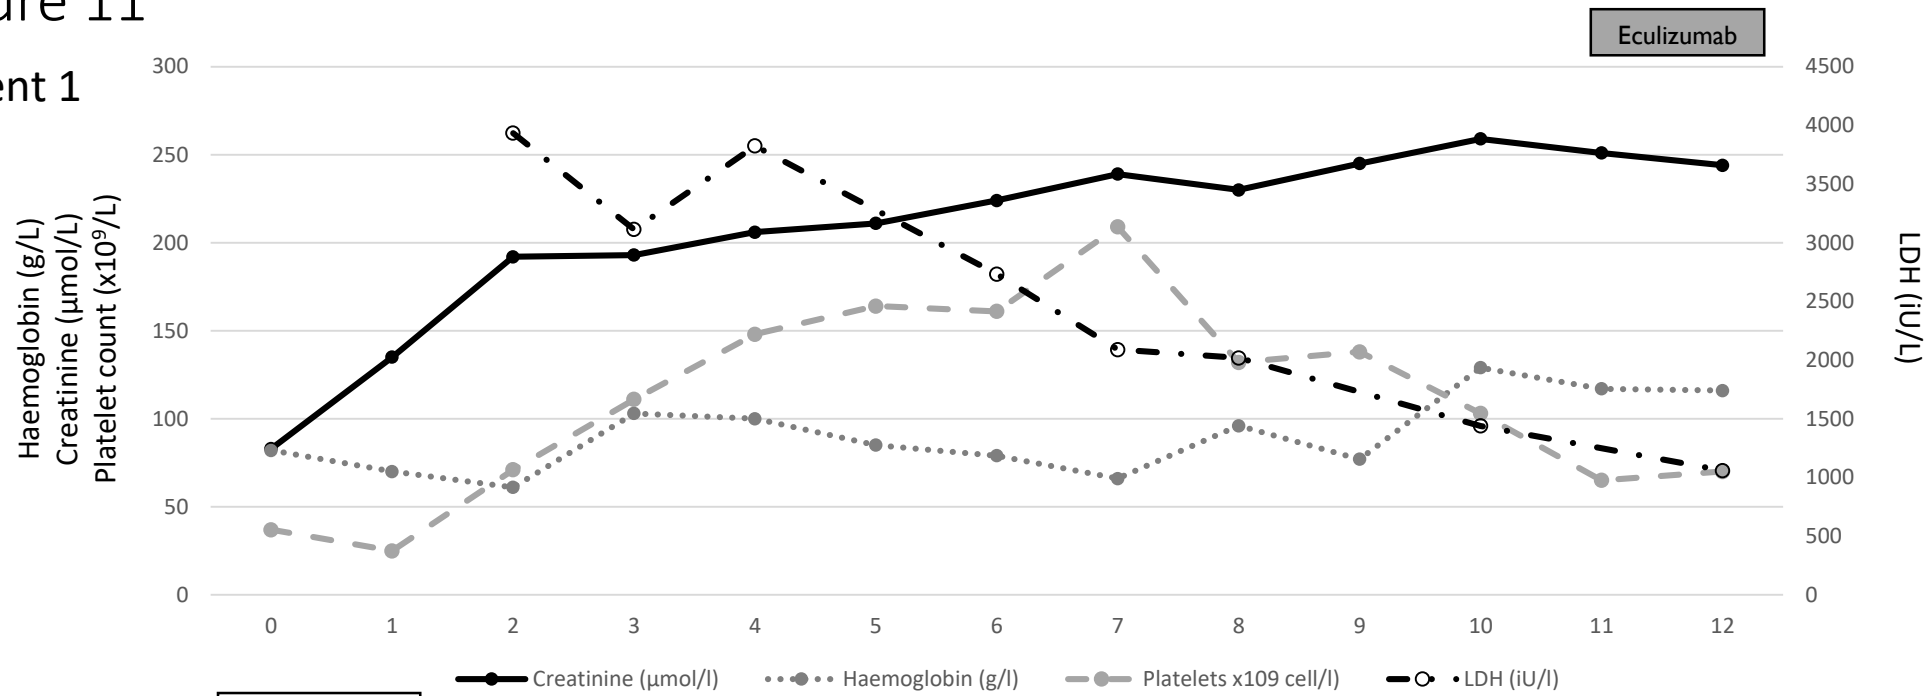

## Patient 2

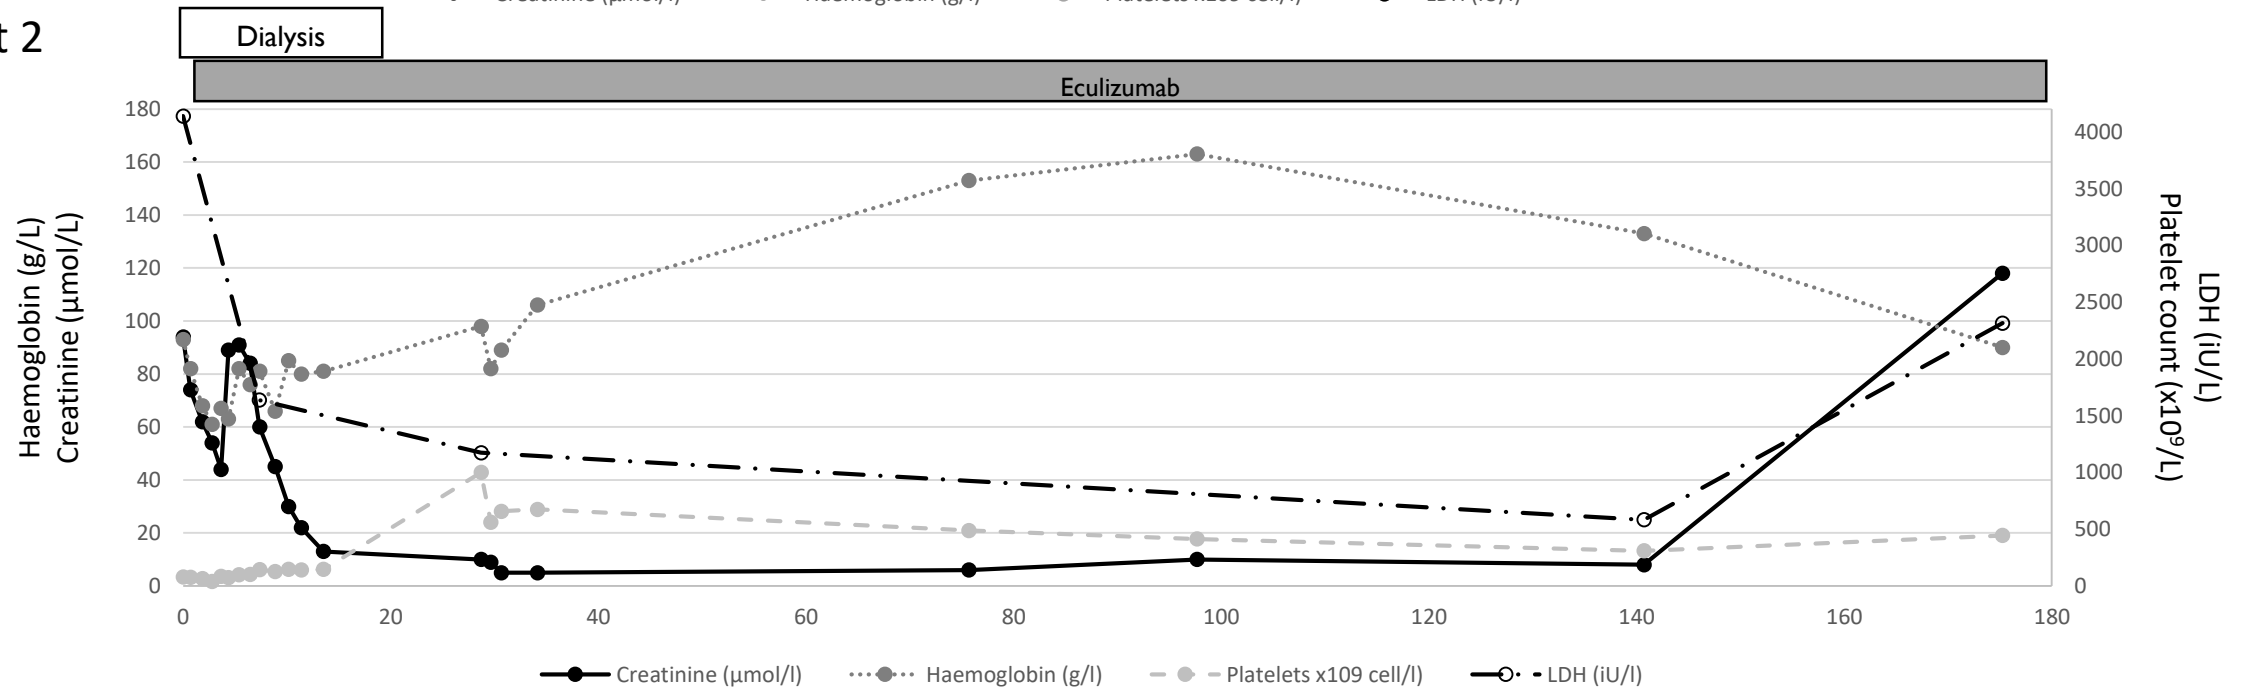

eFigure 12

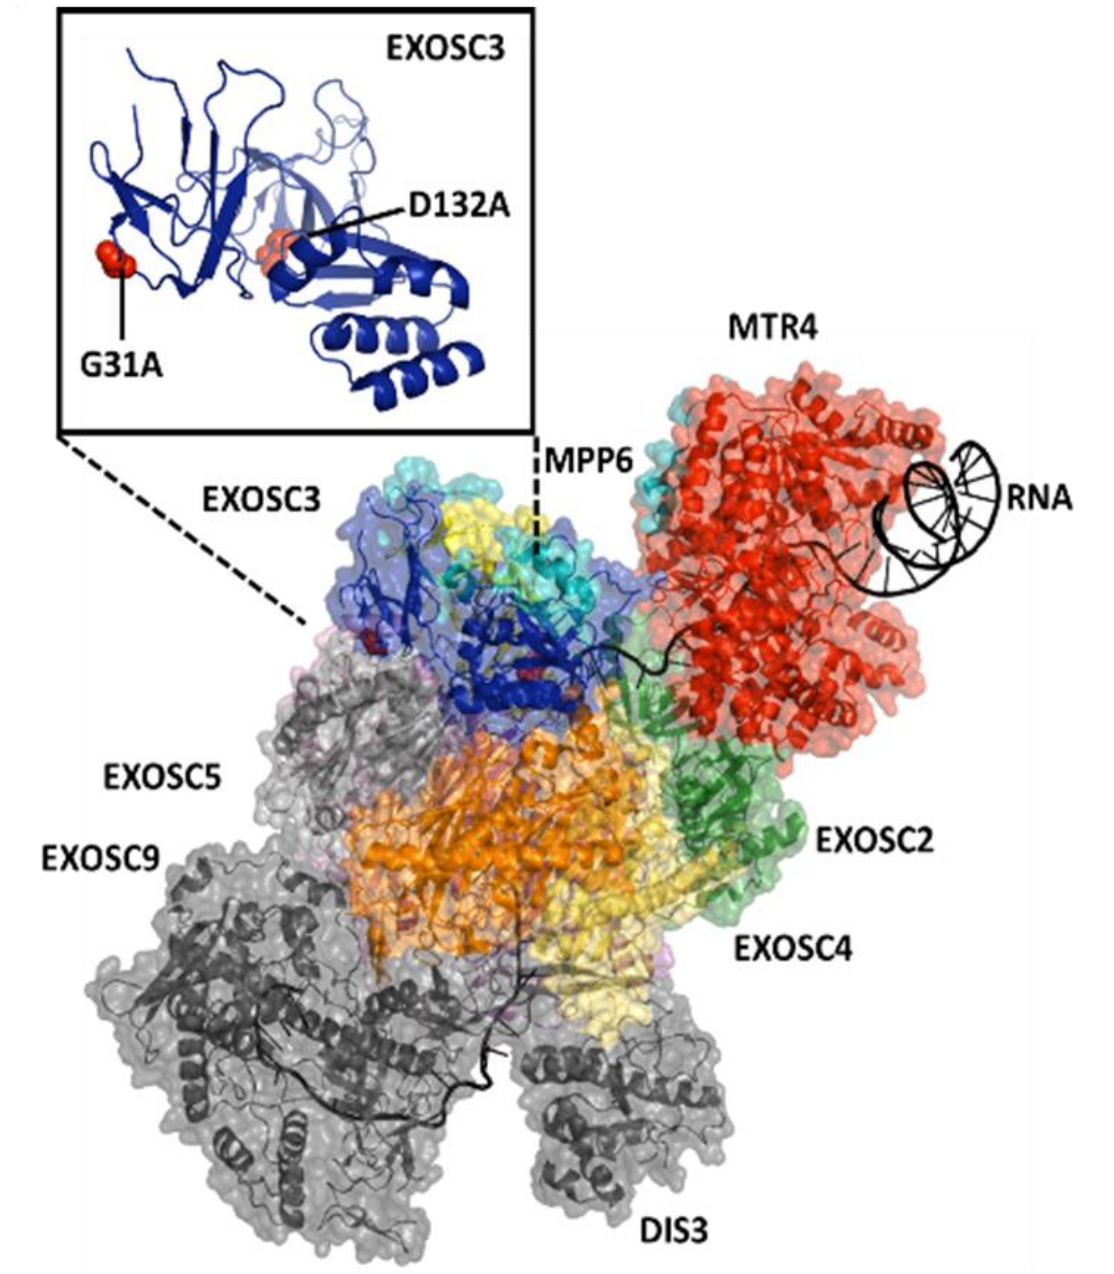

## SUPPLEMENTAL FIGURE LEGENDS

### eFigure 1: Modelling of variants

**A.** *CFH* Mutations and VUS in FH modelled within the alternative pathway (AP) regulatory tri-molecular complex (TMC) of C3b:FH:FI. Produced in Pymol V2.0 (Schrodinger LLC) using the PDB file 5o32 (Xue et al. 2017), this 3D model of FI (heavy chain: yellow; light chain: green) bound to C3b (pale cyan) and FH complement control protein modules (CCPs) 1-4 (purple) displays the putative sites of amino acid residues altered by mutations (red spheres) and VUS (orange spheres) identified in *CFH* coding for amino acids in CCPs1-4 and 19-20 in the aHUS cohorts interrogated by the present study.

**B.** *CD46* Mutations and VUS in CD46 CCP1-4 modelled within the C3b:CD46 CCP1-4 complex. Produced in Pymol V2.0 (Schrodinger LLC) using the PDB file 5fo8 (Forneris et al. 2016), this 3D model of CD46 (purple) bound to C3b (pale cyan) displays the putative sites of amino acid residues altered by mutations (red spheres) and VUS (orange spheres) identified in *CD46* in the aHUS cohorts interrogated by the present study.

**C.** *CFI* Mutations and VUS in FI modelled within the AP Regulatory TMC of C3b:FH:FI. Produced in Pymol V2.0 (Schrodinger LLC) using the PDB file 5o32 (Xue et al. 2017), this 3D model of FI (heavy chain: yellow; light chain: green) bound to C3b (pale cyan) and FH CCPs 1-4 (purple) displays the putative sites of amino acid residues altered by mutations (red spheres) and VUS (orange spheres) identified in *CFI* in the aHUS cohorts interrogated by the present study.

**D.** *C3* Mutations and VUS in C3 modelled within the AP Regulatory TMC of C3b:FH:FI. Produced in Pymol V2.0 (Schrodinger LLC) using the PDB file 5o32 (Xue et al. 2017), this 3D model of FI (heavy chain: yellow; light chain: green) bound to C3b (pale cyan) and FH CCPs 1-4 (purple) displays the putative sites of amino acid residues altered by mutations (red spheres) and VUS (orange spheres) identified in *C3* in the aHUS cohorts interrogated by the present study.

**E.** *CFB* Mutations and VUS in Bb modelled within the C3 convertase. Produced in Pymol V2.0 (Schrodinger LLC) using the PDB file 2win (Wu et al. 2009), this 3D model of Bb (green) bound to C3b (C3c: orange; C3dg: blue; beta chain: purple; C3f: red) displays the putative sites



of amino acid residues altered by mutations (red spheres) and VUS (orange spheres) identified in *CFB* in the aHUS cohorts interrogated by the present study.

**eFigure 2: Family history.**

**A.** Proportion of individuals with a family history of aHUS in the treated cohort. Number and percentage of individuals with a family history for each gene are labelled. This is more representative because all incident aHUS patients in England were referred. **B.** Proportion of individuals with a family history of aHUS in the control cohort. Number and percentage of individuals with a family history for each gene are labelled. This will not be representative because families were preferentially referred to our centre. **C.** Genetic causes in 67 pedigrees referred to the NRCTC with familial TMA. 29.5% had *CFH* mutations, 21% had *CD46* mutations, and 15% remain unsolved.

**eFigure 3: Clinical characteristics at presentation in the treated cohort.**

**A. Blood pressure.** **i.** Systolic blood pressure in adults at presentation, by mutation type. Solid circle = mean. There was no statistical difference between the groups (one way ANOVA). **ii.** Proportion of children with hypertension at presentation, by mutation type (hypertension defined as systolic blood pressure and/or diastolic blood pressure at or above the 95<sup>th</sup> percentile).<sup>35</sup>

**B. Proteinuria at presentation, by mutation type.** Data (urine PCR) was available for 104/243 (44%) of patients; many were anuric. Solid diamond = median. Two extreme outliers were not included on graph: 17,520 (*CD46*), 31,000 (not CaHUS).

**C. CRP at presentation, by group:** CaHUS with a mutation or FHAA, CaHUS with no mutation or FHAA, and not CaHUS. Solid diamond = median. The dashed line represents normal value (<5mg/L). There was a statistically significant difference between the CaHUS with mutation or FHAA and the not CaHUS groups:  $p=0.009$ .

**D. Complement profile.** **i.** C3 at presentation. Solid circle = mean. The dashed lines represent normal range (0.68-1.8 g/L). **ii.** C4 at presentation. Solid circle = mean. The dashed lines represent normal range (0.18-0.6g/L). **iii.** sC5b-9 at presentation. Solid diamond = median. The dashed lines represent normal range (53-173 ng/ml). An extreme outlier was excluded from figure: 4360 in a patient with FHAA and CaHUS/C3G cross over.

#### **eFigure 4: Age at presentation.**

Age at first presentation (data from both control and treated cohorts). **A.** All CaHUS. **B.** Box plot of age at presentation for the different CaHUS groups. **C.** *CFH* mutation. **D.** *CFI* mutations. **E.** *CD46* mutations. **F.** *C3* mutations. **G.** FHAA. **H.** no mutation. **I.** Not CaHUS. **J.** There is a significant difference in the age at presentation of CaHUS between males and female. **K.** When CaHUS age at presentation was analysed specifically looking at childhood, child bearing years and later adulthood there was a significant difference between males and females.

#### **eFigure 5: Triggers, extra renal manifestations and prodrome.**

**A.** Proportion with reported triggers of CaHUS in treated cohort, by mutation type. 31% with CaHUS had a reported trigger. **B.** Proportion with diarrhoeal prodrome in CaHUS treated cohort, by mutation type. 24% with CaHUS had a diarrhoeal prodrome. **C.** Proportion with extra-renal manifestations in presenting CaHUS episode in treated cohort, adults and children. Extra renal manifestations were reported in 19% with CaHUS. Neurological involvement was defined by the presence of seizures, stroke, focal neurological deficit or reduced conscious level. Cardiac involvement was defined by reduced left ventricular systolic function, with or without a rise in troponin. Pancreatitis was defined by a raised serum amylase. The reported liver involvement in one individual was acute liver failure. One individual had retinopathy which was described as hypertensive retinopathy. **D.** Proportion with extra-renal manifestations in presenting CaHUS episode in treated cohort, by mutation type. **E.** Prodromal symptoms or circumstances in adults with CaHUS in the treated cohort. **F.** Prodromal symptoms or circumstances in children with CaHUS in the treated cohort. **G.** Presentation of CaHUS in the treated cohort, by month.

#### **eFigure 6: Five-year cumulative estimates (Kaplan-Meier) of end stage kidney disease free survival.**

Hazard ratios (HR) and 95% confidence intervals calculated using the Cox proportional hazards regression model, p values calculated using the log-rank test, and number needed to treat (NNT) are shown where appropriate. **A.** Treated group (including those without a mutation or FHAA) vs control CaHUS. **B.** Treated group (including those without a mutation or FHAA) vs control CaHUS, children vs adults **C.** Treated CaHUS with mutation or FHAA vs

control CaHUS, by age and sex group. **D.** Treated CaHUS vs control CaHUS, by age and sex group. **E.** *CFH* mutation types, treated vs control. The only statistically significant difference between mutation types was for type 1 vs type 2 C terminal and FH hybrid mutations in the control group, HR 1.26 (95% CI 0.83-1.92);  $p=0.049$ . **F.** *CFI* mutations, treated vs control. **G.** *C3* mutations, treated vs control. **H.** FHAA, treated vs control. **I.** FHAA, treated vs control, uncensored.

**eFigure 7: Long term outcomes.**

Renal function at most recent follow up in the treated CaHUS cohort; follow up period 1 – 10 years; data available for 153/192 (80%).

**eFigure 8: Haematological response to eculizumab**

- A.** Platelet count and eGFR (ml/min/1.73m<sup>2</sup>) at presentation, by mutation type. 11 individuals had a platelet count above 150x10<sup>9</sup>/L at presentation, but had evidence of TMA on kidney biopsy or evidence of haemolysis on the blood film. 46 individuals had a platelet count of <30.
- B.** Proportion who received plasma exchange prior to the first dose of eculizumab, by mutation type. 58% of those with CaHUS received plasma exchange prior to the first dose of eculizumab.
- C.** Haematological response to eculizumab, defined by number of days from first dose of eculizumab to platelet normalisation (>150x10<sup>9</sup>/L), for 71 individuals who did not receive plasma exchange prior to starting eculizumab for whom data was available. Median, interquartile range, 1.5x interquartile range and outliers are shown. There was no statistical difference between the mutation types. The median for all CaHUS was 5 days, compared with 4 days for the analysis that included all individuals (Figure 3B).

**eFigure 9: Multivariate analysis of factors associated with a response to eculizumab in the treated CaHUS cohort.**

**eFigure 10: Complications of eculizumab.**

Time on treatment and incidence of meningococcal infection in the eculizumab treated cohort. All three individuals who had meningococcal infection survived with minimal

morbidity. In the UK monitoring of the serological response to the vaccine with annual testing of ACWY titres is recommended; we are not able to check B titres in patients receiving eculizumab because the assay is complement dependent. One individual stopped eculizumab because of headaches, but no other adverse effects of the drug were reported.

**eFigure 11: Non- response to Eculizumab therapy in patients with EXOSC3 mediated aHUS.**

The two patients in the NRCTC cohort presented with aHUS after RSV infection and an unspecified respiratory virus.

**eFigure 12: Mutations in EXOSC3 displayed on the crystal structure:** Both patients had biallelic mutations in EXOSC3 patient 1: c.395A>C (p.D132A) and c.341\_343del; patient 2 c.395A>C (p.D132A), c.92G>C (p.G31A); The Human RNA exosome with MTR4 delivering single stranded RNA bound, EXOSC3 highlighted in blue, with variants identified in this study highlighted on image inset. Generated on Pymol (PDB 6D6Q).

## Supplemental Methods

### Definition of complement mediated aHUS

Individuals referred to the NRCTC with suspected CaHUS undergo comprehensive diagnostic evaluation. Complement mediated aHUS is a diagnosis of exclusion.

Diagnostic criteria have been established in UK by the aHUS Rare Disease Group (<http://rarerenal.org/rare-disease-groups/atypical-haemolytic-uraemic-syndrome-rdg/>) for the diagnosis of aHUS<sup>1</sup>. Inclusion criteria are the triad of microangiopathic haemolytic anaemia (MAHA; evidence of erythrocyte fragmentation on peripheral blood film microscopy), thrombocytopenia and acute kidney injury (AKI), and/or a kidney biopsy showing thrombotic microangiopathy. Exclusion criteria are: thrombotic thrombocytopenic purpura (TTP) – ADAMTS13 <10%; shiga toxin HUS (STEC-HUS) – culture, serology and shiga toxin PCR; DGKE nephropathy – *DGKE* genetic analysis; disseminated intravascular coagulation (DIC) – abnormal coagulation; pneumococcal HUS – culture, urinary antigen, Coombs test positive, T-antigen; HIV; drug induced TMA – causative drug in relevant clinical context, including cisplatin, gemcitabine, mitomycin, interferon  $\alpha,\beta$ , calcineurin inhibitors; cobalamin C deficiency TMA – serum homocysteine, methionine and methyl-malonic acid, and *MMACHC* genetic analysis; malignancy associated TMA; bone marrow transplant associated TMA; *de novo* TMA post solid organ transplant; glomerular disease associated TMA – kidney biopsy suggesting IgA nephropathy, ANCA associated vasculitis, focal segmental glomerulosclerosis, membranous nephropathy or C3 glomerulopathy; autoimmune disease associated TMA – systemic lupus erythematosus (ANA, anti-dsDNA antibodies), catastrophic anti-phospholipid syndrome (anti-phospholipid antibodies), scleroderma renal crisis (anti-Scl70 antibodies, RNA polymerase III); severe hypertension TMA.<sup>2</sup>

### Study Population

Individuals with suspected CaHUS but no pathogenic mutation or autoantibody were not included in the control cohort because a comprehensive diagnostic evaluation to exclude other causes of thrombotic microangiopathy was not mandatory prior to the commencement of the national specialist service in 2013.

The treated cohort comprised individuals referred between 2013 and July 2019 with suspected CaHUS who received eculizumab for native kidney disease, and those in whom no alternative diagnosis was ultimately identified were included in the treated CaHUS cohort for analysis. Individuals referred prior to 2013 who were treated with eculizumab either as part of a clinical trial or on compassionate grounds were included in the treated cohort. Kidney transplant recipients were excluded.

In the survival analysis, individuals who were treated with eculizumab at the time of a relapse but not the first presentation of aHUS (n=17) were analysed in the control cohort up until the point at which they received eculizumab. The minimum follow up period was 12 months.

Incidence rates were calculated for the cohort presenting in England from 2013 – July 2019 using the estimated population of England according to the Office for National Statistics.<sup>3</sup>

### **Data Collection**

For the control cohort outcome data (demographics, family history, death, renal outcome, genetic and autoantibody analysis) were obtained from the NRCTC database and communication with clinicians. For the control cohort data the only data point relating to management that was collected, if available, was whether or not plasma therapy was performed.

For the treated cohort, data were collected on demographics and family history, clinical presentation, laboratory characteristics, genetic and autoantibody analysis, response to eculizumab, and outcome (death and renal outcome). Individuals in England who receive eculizumab enter into a 'shared care agreement' between their local consultant and the NRCTC. Data were reported by local clinicians to the NRCTC and held in a central database. 27% of patients were registered with The National Registry of Rare Kidney Diseases (RaDaR) and this was used to retrieve laboratory test results. For individuals outside of England data were reported by local clinicians to the NRCTC. Patients with >75% complete datasets were included in the analysis.

The eculizumab treated cohort received the dosing schedule recommended by the manufacturer, Alexion Pharmaceuticals Inc (New Haven, CT) as well as meningococcal vaccination and prophylactic antibiotics (see **Supplemental data**).

### **Renal function and blood pressure**

Renal function was classified by glomerular filtration rate (GFR) and albuminuria categories according to the Kidney Disease Improving Global Outcomes (KDIGO) recommendations.<sup>4</sup>

The estimated glomerular filtration rate (eGFR) was calculated as follows: for children (<18 years), the Schwartz formula was used, and for adults the CKD-EPI equation was used as previously described.<sup>5</sup>

Blood pressure in children was analysed with reference to the Fourth Report on Diagnosis, Evaluation, and Treatment of High Blood Pressure in Children and Adolescents, with hypertension defined as systolic blood pressure and/or diastolic blood pressure at or above the 95<sup>th</sup> percentile.<sup>6</sup>

## **Outcomes**

The primary outcome in the comparison between the eculizumab treated CaHUS and control CaHUS cohorts was five-year end stage kidney disease (ESKD)-free survival.

In the analysis of the eculizumab treated CaHUS cohort the secondary outcomes were ESKD free survival at 6 months; estimated glomerular filtration rate (eGFR) of >60 ml/min at 6 months (chronic kidney disease stage (CKD) G1-212 or no CKD); and renal response to eculizumab at 6 months, a composite outcome of achieving dialysis independence if dialysis had been required, or >33% decrease in serum creatinine if dialysis had not been required (this represents the inverse of the  $\geq 50\%$  increase in serum creatinine within 7 days that prospectively defines KDIGO stage 1 acute kidney injury).

Other secondary outcomes in the analysis of the eculizumab treated cohort were haematological response to eculizumab (defined as normalisation of platelet count  $>150 \times 10^9/L$ ) and renal response to eculizumab (recovery from dialysis dependency or change in serum creatinine at 1 week, 2 weeks, 1 month, 3 months, 6 months and 12 months).

## **Statistical analysis**

Patient characteristics were examined using descriptive statistics for continuous variables (mean, median) and categorical variables (number, %). Laboratory data are presented as mean (range). Renal survival was examined using Kaplan-Meier analysis and Cox Regression. Significance tests for continuous variables were the ANOVA for normally distributed data and the Kruskal-Wallis test for data that were not normally distributed. Serial creatinine measurements were analysed using the Friedman test.

In the multivariate analysis the association of factors of interest (genetics, age at initial presentation, ethnicity, serum creatinine, haemoglobin, platelet count, time from presentation to treatment, C3, C4; systolic blood pressure was not available for all patients so analyses were performed without (n=173) and with (n=88) systolic blood pressure) with the secondary outcomes in the analysis of the eculizumab treated cohort was assessed using logistic regression model. Statistical analyses were performed using IBM Statistical Package for Social Sciences (SPSS) and R.<sup>7</sup>

### **Complement assays**

C3 and C4 levels were measured by rate nephelometry (Beckman Coulter Array 360, Beckman Coulter; High Wycombe, United Kingdom). The normal ranges were C3 (0.68–1.38 g/l), C4 (0.18–0.60 g/l). The FH autoantibody (FHAA) consensus assay was performed as previously described.<sup>8</sup>

### **Variant modelling**

Variants were modelled using Pymol V2.0 (Schrodinger LLC)

### **Limitations of study**

This study is limited by its observational nature, however CaHUS is an ultra-orphan disease and as such a randomised genotype matched controlled trial is not feasible. We acknowledge that the treated cohort presented from 2013 onwards, but individuals in the control cohort were referred in the 1990s through to 2012. The magnitude of this selection bias cannot be determined, but one-year unadjusted survival of incident adult renal replacement therapy patients in the United Kingdom was 87.0% in 1999 and 92.9% in 2018 for those <65 years and 67.9% in 1999 and 79.3% in 2018 for those ≥65 years<sup>9</sup>. Additionally there is selection bias relating to treatment inconsistency: some individuals who presented after 2013 were managed locally and not treated with eculizumab, and were included in the control cohort. In the control CaHUS group we felt that it was not possible to include individuals with no complement mutation due to variable diagnostic evaluation pre-2013 and as such Kaplan-Meier survival analysis was performed on a genotype matched subgroup.



## References

1. Sheerin NS, Kavanagh D, Goodship TH, Johnson S. A national specialized service in England for atypical haemolytic uraemic syndrome-the first year's experience. *QJM*. Jan 2016;109(1):27-33. doi:10.1093/qjmed/hcv082
2. Brocklebank V, Wood KM, Kavanagh D. Thrombotic Microangiopathy and the Kidney. *Clin J Am Soc Nephrol*. Feb 7 2018;13(2):300-317. doi:10.2215/CJN.00620117
3. Office for National Statistics. Population estimates. Available at: <https://www.ons.gov.uk/peoplepopulationandcommunity/populationandmigration/populationestimates>. Accessed August 2020.
4. Summary of Recommendation Statements. *Kidney Int Suppl*. 2013;3:5-14.
5. Brocklebank V, Kumar G, Howie AJ, Chandar J, Milford DV. Long-term outcomes and response to treatment in DGKE nephropathy. *Kidney International*. 2020;97(6):1260-1274.
6. National High Blood Pressure Education Program Working Group on High Blood Pressure in C, Adolescents. The fourth report on the diagnosis, evaluation, and treatment of high blood pressure in children and adolescents. *Pediatrics*. Aug 2004;114(2 Suppl 4th Report):555-76.
7. Team RC. R: A language and environment for statistical computing. *R Foundation for Statistical Computing, Vienna, Austria*. 2013;
8. Watson R, Lindner S, Bordereau P, et al. Standardisation of the factor H autoantibody assay. *Immunobiology*. Jan 2014;219(1):9-16. doi:10.1016/j.imbio.2013.06.004
9. UK Renal Registry (2021) UK Renal Registry 23rd Annual Report - data to 31/12/2019, Bristol, UK. (Chapter 2):38.

**eTable 1:** <sup>a</sup>Figure 1 additional data – individuals who presented after 2013 who were not treated with eculizumab, but were found to have a pathogenic variant and were included in the control cohort

| Patient number | Gene                | Reason not treated                                                                                                | Outcome                  |
|----------------|---------------------|-------------------------------------------------------------------------------------------------------------------|--------------------------|
| 47             | <i>CFH</i>          | Managed locally without eculizumab, referred for transplant work up.                                              | ESKD                     |
| 67             | <i>CFH</i>          | Managed locally without eculizumab, referred for transplant work up.                                              | ESKD                     |
| 84             | <i>CFH</i>          | Managed locally without eculizumab, referred for transplant work up.                                              | Recovered renal function |
| 85             | <i>CFH</i>          | Managed locally without eculizumab, referred for transplant work up.                                              | ESKD                     |
| 162            | <i>CFH</i>          | Managed locally without eculizumab, referred for transplant work up.                                              | ESKD                     |
| 171            | <i>CFH</i>          | Managed locally without eculizumab. Thought to be hypertension associated TMA                                     | Recovered renal function |
| 178            | <i>CFHR1</i> hybrid | Managed locally without eculizumab, spontaneous recovery                                                          | Recovered renal function |
| 184            | <i>CFI</i>          | Managed locally without eculizumab, referred for transplant work up. Thought to be macrophage activation syndrome | Recovered renal function |
| 185            | <i>CFI</i>          | Managed locally without eculizumab, referred for transplant work up.                                              | ESKD                     |
| 186            | <i>CFI</i>          | Managed locally without eculizumab, referred for transplant work up.                                              | ESKD                     |
| 190            | <i>CFI</i>          | Managed locally without eculizumab, referred for transplant work up.                                              | ESKD                     |
| 198            | <i>CFI</i>          | No TMA on biopsy                                                                                                  | ESKD                     |
| 199            | <i>CFI</i>          | Thought to be hypertension/CKD associated TMA                                                                     | ESKD                     |
| 200            | <i>CFI</i>          | Thought to be hypertension/CKD associated TMA                                                                     | ESKD                     |
| 201            | <i>CFI</i>          | Thought to be hypertension/CKD associated TMA                                                                     | ESKD                     |
| 230            | <i>CD46</i>         | Managed locally without eculizumab, thought to be hypertension related TMA, referred for transplant work up       | ESKD                     |
| 231            | <i>CD46</i>         | Spontaneous recovery                                                                                              | Recovered renal function |
| 232            | <i>CD46</i>         | Spontaneous recovery                                                                                              | Recovered renal function |
| 234            | <i>CD46</i>         | Spontaneous recovery                                                                                              | Recovered renal function |
| 235            | <i>CD46</i>         | Spontaneous recovery                                                                                              | Recovered renal function |
| 236            | <i>CD46</i>         | Not in UK, eculizumab not available                                                                               | Recovered renal function |
| 237            | <i>CD46</i>         | Spontaneous recovery                                                                                              | Recovered renal function |
| 238            | <i>CD46</i>         | Spontaneous recovery                                                                                              | Recovered renal function |
| 239            | <i>CD46</i>         | Spontaneous recovery                                                                                              | Recovered renal function |
| 254            | <i>CD46</i>         | Spontaneous recovery                                                                                              | Recovered renal function |
| 255            | <i>CD46</i>         | Spontaneous recovery                                                                                              | Recovered renal function |
| 256            | <i>CD46</i>         | Spontaneous recovery                                                                                              | Recovered renal function |
| 257            | <i>CD46</i>         | Not in UK, eculizumab not available                                                                               | Recovered renal function |
| 258            | <i>CD46</i>         | Spontaneous recovery                                                                                              | Recovered renal function |
| 259            | <i>CD46</i>         | Spontaneous recovery                                                                                              | Recovered renal function |
| 274            | <i>C3</i>           | Chronic TMA on biopsy                                                                                             | ESKD                     |
| 292            | <i>C3</i>           | MPGN and TMA on biopsy                                                                                            | ESKD                     |
| 23             | FHAA                | Spontaneous recovery                                                                                              | Recovered renal function |

|     |          |                                                                      |                          |
|-----|----------|----------------------------------------------------------------------|--------------------------|
| 302 | FHAA     | Spontaneous recovery                                                 | Recovered renal function |
| 305 | FHAA     | Diagnostic uncertainty                                               | Recovered renal function |
| 307 | FHAA     | Diagnostic uncertainty                                               | Recovered renal function |
| 310 | FHAA     | Not acute presentation, TMA on biopsy                                | Recovered renal function |
| 311 | FHAA     | Managed locally without eculizumab, spontaneous recovery             | Recovered renal function |
| 315 | Combined | Not in UK, eculizumab not available                                  | Died                     |
| 317 | Combined | Managed locally without eculizumab, referred for transplant work up. | ESKD                     |

**eTable 2:** Genetic and clinical data for the control cohort.

| Patient Number | C' Gene | Mutation                                                 | Pathogenicity*      | Function Refs | #Populati on frequency % | Family history | Sex | Age at onset | PEX | ESKD |
|----------------|---------|----------------------------------------------------------|---------------------|---------------|--------------------------|----------------|-----|--------------|-----|------|
| 41             | CFH     | c.1672T>G p.(Trp558Gly)                                  | Type 1              | -             | NA                       | No             | M   | 44           | Y   | yes  |
| 42             | CFH     | c.1705T>A p.(Cys569Ser)                                  | Type 1              | -             | NA                       | No             | F   | 36           | U   | yes  |
| 43             | CFH     | c.1873G>T p.(Glu625*)                                    | Type 1              | -             | 0.0014                   | Yes            | F   | 20           | U   | yes  |
| 44             | CFH     | c.1873G>T p.(Glu625*)                                    | Type 1              | -             | 0.0014                   | Yes            | F   | 26           | U   | yes  |
| 45             | CFH     | c.1975T>C; p.(Cys659Arg)                                 | Type 1              | -             | 0.0004                   | No             | F   | 24           | Y   | no   |
| 46             | CFH     | c.2114C>T p.(Ser705Phe)                                  | Type 1              | -             | 0.0057                   | No             | F   | 71           | U   | no   |
| 47             | CFH     | c.2409C>A, p.(Cys803*)                                   | Type 1              | -             | NA                       | No             | F   | 57           | Y   | yes  |
| 48             | CFH     | c.2596+1G>A                                              | Type 1              | -             | NA                       | No             | F   | 18           | Y   | no   |
| 49             | CFH     | c.2596+1G>C                                              | Type 1              | -             | 0.004                    | No             | F   | 39           | U   | yes  |
| 50             | CFH     | c.2636G>A p.(Gly879Glu)                                  | Type 2 (C-terminal) | -             | NA                       | No             | M   | 73           | Y   | yes  |
| 51             | CFH     | c.2880delT p.(Phe960Leufs*15)<br>Homozygous              | Type 1              | -             | NA                       | No             | M   | 1            | FFP | no   |
| 52             | CFH     | c.2918G>A p.(Cys973Tyr)                                  | Type 1              | [3]           | NA                       | Yes            | F   | 30           | U   | yes  |
| 53             | CFH     | c.3229T>C p.(Cys1077Arg)                                 | Type 1              | -             | NA                       | No             | M   | 32           | Y   | yes  |
| 54             | CFH     | c.3590T>C, p.(Val1197Ala)                                | Type 2 (C-terminal) | [4, 5]        | 0.00071                  | No             | F   | 1            | Y   | no   |
| 55             | CFH     | c.3398C>G p.(Ser1133*)                                   | Type 1              | -             | NA                       | No             | F   | 16           | Y   | no   |
| 56             | CFH     | c.3468dupA<br>p.(Trp1157Metfs*22)                        | Type 1              | -             | NA                       | No             | F   | 26           | Y   | yes  |
| 57             | CFH     | c.3471G>C p.(Trp1157Cys)                                 | Type 1              | -             | NA                       | No             | F   | 69           | Y   | yes  |
| 58             | CFH     | c.3549G>T p.(Trp1183Cys)                                 | Type 2 (C-terminal) | [8]           | NA                       | No             | F   | 20           | U   | no   |
| 59             | CFH     | c.3550A>C p.(Thr1184Pro)                                 | Type 2 (C-terminal) | -             | NA                       | No             | M   | 56           | U   | yes  |
| 60             | CFH     | c.3550A>G p.(Thr1184Ala)                                 | Type 2 (C-terminal) | [9]           | NA                       | No             | F   | 34           | Y   | yes  |
| 61             | CFH     | c.3572C>T p.(Ser1191Leu)                                 | Type 2 (C-terminal) | [10]          | NA                       | No             | F   | 21           | N   | yes  |
| 62             | CFH     | c.3572C>T p.(Ser1191Leu) and<br>c.3590T>C p.(Val1197Ala) | Type 2 (C-terminal) | [10, 11]      | NA                       | Yes            | M   | 24           | N   | yes  |
| 63             | CFH     | c.3572C>T p.(Ser1191Leu) and<br>c.3590T>C p.(Val1197Ala) | Type 2 (C-terminal) | [10, 11]      | NA                       | Yes            | F   | 25           | U   | no   |
| 64             | CFH     | c.3572C>T p.(Ser1191Leu)                                 | Type 2 (C-terminal) | [10]          | NA                       | No             | F   | 35           | Y   | yes  |
| 65             | CFH     | c.3590T>C, p.(Val1197Ala)                                | Type 2 (C-terminal) | [4, 5]        | 0.00071                  | No             | M   |              |     |      |
| 66             | CFH     | c.3590T>C, p.(Val1197Ala)                                | Type 2 (C-terminal) | [4, 5]        | 0.00071                  | No             | F   | 32           | Y   | yes  |
| 67             | CFH     | c.3607C>T p.(Arg1203Trp)                                 | Type 2 (C-terminal) | [13, 14]      | 0.0046                   | No             | F   | 28           | U   | yes  |

|    |     |                                            |                     |      |           |     |   |    |     |     |
|----|-----|--------------------------------------------|---------------------|------|-----------|-----|---|----|-----|-----|
| 68 | CFH | c.3616C>T p.(Arg1206Cys)                   | Type 2 (C-terminal) | [13] | NA        | No  | F | 30 | U   | yes |
| 69 | CFH | c.3628C>T p.(Arg1210Cys)                   | Type 2 (C-terminal) | [10] | 0.015     | No  | M | 22 | U   | yes |
| 70 | CFH | c.3643C>G p.(Arg1215Gly)                   | Type 2 (C-terminal) | [10] | 0.000008* | No  | F | 22 | Y   | yes |
| 71 | CFH | c.3643C>G p.(Arg1215Gly)                   | Type 2 (C-terminal) | [10] | 0.000008* | No  | F | 22 | U   | yes |
| 72 | CFH | c.3643C>G p.(Arg1215Gly)                   | Type 2 (C-terminal) | [10] | 0.000008* | Yes | F | 26 | N   | yes |
| 73 | CFH | c.3643C>G p.(Arg1215Gly)                   | Type 2 (C-terminal) | [10] | 0.000008* | Yes | M | 47 | N   | no  |
| 74 | CFH | c.3643C>G p.(Arg1215Gly)                   | Type 2 (C-terminal) | [10] | 0.000008* | Yes | F | 17 | U   | yes |
| 75 | CFH | c.3643C>G p.(Arg1215Gly)                   | Type 2 (C-terminal) | [10] | 0.000008* | Yes | F | 25 | Y   | no  |
| 76 | CFH | c.3643C>G p.(Arg1215Gly)                   | Type 2 (C-terminal) | [10] | 0.000008* | Yes | M | 29 | U   | yes |
| 77 | CFH | c.3643C>G p.(Arg1215Gly)                   | Type 2 (C-terminal) | [10] | 0.000008* | No  | M | 64 | U   | yes |
| 78 | CFH | c.3643C>T p.(Arg1215*)                     | Type 1              | -    | 0.0004    | No  | F | 35 | Y   | no  |
| 79 | CFH | c.3643C>T p.(Arg1215*)                     | Type 1              | -    | 0.0004    | No  | M | 62 | U   | yes |
| 80 | CFH | c.3644G>A p.(Arg1215Gln)                   | Type 2 (C-terminal) | [16] | 0.000008* | No  | M | 51 | Y   | yes |
| 81 | CFH | c.3644G>A p.(Arg1215Gln)                   | Type 2 (C-terminal) | [16] | 0.000008* | No  | M | 1  | Y   | no  |
| 82 | CFH | c.3676C>G p.(Pro1226Ala)                   | Type 2 (C-terminal) | -    | NA        | No  | F | 39 | N   | no  |
| 83 | CFH | c.3677C>A p.(Pro1226Gln)<br>Homozygous     | Type 2 (C-terminal) | -    | NA        | No  | M |    | U   |     |
| 84 | CFH | c.481G>T p.(Ala161Ser)                     | Type 2 (N-terminal) | [18] | 0.0092    | No  | F | 1  | N   | no  |
| 85 | CFH | CFH:CFHR1 hybrid                           | FH hybrid           | [19] | NA        | No  | M | 39 | N   | yes |
| 86 | CFH | CFH:CFHR1 hybrid                           | FH hybrid           | [19] | NA        | No  | M | 22 | U   | yes |
| 87 | CFH | c.2671T>G, p.(Tyr891Asp)                   | Type 1              | -    | NA        | Yes | M | 1  | Y   | yes |
| 88 | CFH | c.2671T>G, p.(Tyr891Asp)                   | Type 1              | -    | NA        | Yes | M | 1  | N   | no  |
| 89 | CFH | c.3546_3581dup36<br>p.(Trp1183_Gly1194dup) | Type 1              | -    | NA        | Yes | F | 1  | FFP | no  |
| 90 | CFH | c.3546_3581dup36<br>p.(Trp1183_Gly1194dup) | Type 1              | -    | NA        | Yes | M |    | U   |     |
| 91 | CFH | c.79_82del p.(Arg27Glufs*6)                | Type 1              | -    | NA        | No  | M | 37 | U   | yes |
| 92 | CFH | c.3550A>G p.(Thr1184Ala)                   | Type 2 (C-terminal) | [10] | NA        | No  | M | 60 | N   | yes |
| 93 | CFH | c.3562_3564 del<br>p.(Lys1188del)          | Type 2 (C-terminal) | -    | NA        | No  | M | 42 | Y   | yes |
| 94 | CFH | c.3546G>T; p.(Arg1182Ser)                  | Type 2 (C-terminal) | [10] | NA        | No  | F | 1  | Y   | yes |
| 95 | CFH | c.2018G>A p.(Cys673Tyr)                    | Type 1              | -    | NA        | No  | F | 5  | Y   | yes |
| 96 | CFH | CFH:CFHR1 hybrid                           | FH hybrid           | [19] | NA        | No  | M | 23 | N   | yes |
| 97 | CFH | CFH::CFHR3 hybrid                          | FH hybrid           | [19] | NA        | Yes | F | 25 | N   | yes |
| 98 | CFH | CFH::CFHR3 hybrid                          | FH hybrid           | [19] | NA        | Yes | M | 44 | Y   | yes |

|     |     |                                                                |                         |      |           |     |   |    |   |     |
|-----|-----|----------------------------------------------------------------|-------------------------|------|-----------|-----|---|----|---|-----|
| 99  | CFH | 0.59Mb deletion<br>hg19 chr 1:g.196,711,285-<br>196,770,525del | Type 1                  | -    | NA        | No  | F | 17 | Y | yes |
| 100 | CFH | c.3572C>T p.(Ser1191Leu) and<br>c.3590T>C p.(Val1197Ala)       | Type 2 (C-<br>terminal) | [19] | NA        | Yes | F | 15 | Y | yes |
| 101 | CFH | c.3572C>T p.(Ser1191Leu) and<br>c.3590T>C p.(Val1197Ala)       | Type 2 (C-terminal)     | [11] | NA        | No  | F | 1  | U | yes |
| 102 | CFH | c.3590T>C p.(Val1197Ala)                                       | Type 2 (C-terminal)     | [10] | 0.00071   | No  | M | 1  | N | yes |
| 103 | CFH | c.3572C>T p.(Ser1191Leu) and<br>c.3590T>C p.(Val1197Ala)       | Type 2 (C-terminal)     | [11] | NA        | No  | F | 1  | Y | no  |
| 104 | CFH | c.3572C>T p.(Ser1191Leu)                                       | Type 2 (C-terminal)     | [10] | NA        | Yes | F |    | U |     |
| 105 | CFH | c.3572C>T p.(Ser1191Leu)                                       | Type 2 (C-terminal)     | [10] | NA        | Yes | M |    | U |     |
| 106 | CFH | c.3572C>T p.(Ser1191Leu)                                       | Type 2 (C-terminal)     | [10] | NA        | No  | M | 10 | U | yes |
| 107 | CFH | c.3572C>T p.(Ser1191Leu)                                       | Type 2 (C-terminal)     | [10] | NA        | Yes | F | 1  | N | yes |
| 108 | CFH | c.3572C>T p.(Ser1191Leu)                                       | Type 2 (C-terminal)     | [10] | NA        | Yes | M | 30 | Y | yes |
| 109 | CFH | c.3572C>T p.(Ser1191Leu)                                       | Type 2 (C-terminal)     | [10] | NA        | Yes | F | 4  | Y | yes |
| 110 | CFH | c.3572C>T p.(Ser1191Leu)                                       | Type 2 (C-terminal)     | [10] | NA        | Yes | F | 3  | N | yes |
| 111 | CFH | c.3572C>T p.(Ser1191Leu)                                       | Type 2 (C-terminal)     | [10] | NA        | Yes | F | 4  | Y | no  |
| 112 | CFH | c.3572C>T p.(Ser1191Leu) and<br>c.3590T>C p.(Val1197Ala)       | Type 2 (C-<br>terminal) | [19] | NA        | No  | F | 35 | U | yes |
| 113 | CFH | CFH:CFHR1 hybrid                                               | FH hybrid               | [19] | NA        | No  | F | 29 | Y | yes |
| 114 | CFH | c.3643C>G p.(Arg1215Gly)                                       | Type 2 (C-terminal)     | [10] | 0.000008* | No  | F | 1  | N | yes |
| 115 | CFH | c.3356A>G p.(Asp1119Gly)                                       | Type 2 (C-terminal)     | [10] | 0.0004    | Yes | F |    | U | yes |
| 116 | CFH | c.3356A>G p.(Asp1119Gly)                                       | Type 2 (C-terminal)     | [10] | 0.0004    | Yes | F | 20 | U | yes |
| 117 | CFH | c.3454T>A p.(Cys1152Ser)                                       | Type 1                  | -    | 0.0004    | No  | F | 32 | Y | no  |
| 118 | CFH | c.3643C>G p.(Arg1215Gly)                                       | Type 2 (C-terminal)     | [10] | 0.000008* | Yes | M | 26 | Y | yes |
| 119 | CFH | c.3643C>G p.(Arg1215Gly)                                       | Type 2 (C-terminal)     | [10] | 0.000008* | Yes | F | 17 | U | yes |
| 120 | CFH | c.3643C>G p.(Arg1215Gly)                                       | Type 2 (C-terminal)     | [10] | 0.000008* | Yes | M | 60 | U | yes |
| 121 | CFH | c.3643C>G p.(Arg1215Gly)                                       | Type 2 (C-terminal)     | [10] | 0.000008* | Yes | F | 26 | U | yes |
| 122 | CFH | c.3643C>G p.(Arg1215Gly)                                       | Type 2 (C-terminal)     | [10] | 0.000008* | Yes | F | 23 | U | yes |
| 123 | CFH | c.3643C>G p.(Arg1215Gly)                                       | Type 2 (C-terminal)     | [10] | 0.000008* | Yes | M | 1  | U | yes |
| 124 | CFH | c.3643C>G p.(Arg1215Gly)                                       | Type 2 (C-terminal)     | [10] | 0.000008* | Yes | M | 1  | U | yes |
| 125 | CFH | c.3643C>G p.(Arg1215Gly)                                       | Type 2 (C-terminal)     | [10] | 0.000008* | Yes | M | 3  | U | yes |
| 126 | CFH | c.3643C>G p.(Arg1215Gly)                                       | Type 2 (C-terminal)     | [10] | 0.000008* | Yes | F | 15 | U | yes |
| 127 | CFH | c.3643C>G p.(Arg1215Gly)                                       | Type 2 (C-terminal)     | [10] | 0.000008* | Yes | F | 19 | U | yes |
| 128 | CFH | c.3643C>G p.(Arg1215Gly)                                       | Type 2 (C-terminal)     | [10] | 0.000008* | Yes | F | 20 | U | yes |
| 129 | CFH | c.3643C>G p.(Arg1215Gly)                                       | Type 2 (C-terminal)     | [10] | 0.000008* | Yes | F | 22 | U | yes |
| 130 | CFH | c.3643C>G p.(Arg1215Gly)                                       | Type 2 (C-terminal)     | [10] | 0.000008* | Yes | M | 24 | U | yes |

|     |     |                                                       |                     |      |           |     |   |    |   |     |
|-----|-----|-------------------------------------------------------|---------------------|------|-----------|-----|---|----|---|-----|
| 131 | CFH | c.3643C>G p.(Arg1215Gly)                              | Type 2 (C-terminal) | [10] | 0.000008* | Yes | M | 25 | U | yes |
| 132 | CFH | c.3643C>G p.(Arg1215Gly)                              | Type 2 (C-terminal) | [10] | 0.000008* | Yes | F | 27 | U | yes |
| 133 | CFH | c.3643C>G p.(Arg1215Gly)                              | Type 2 (C-terminal) | [10] | 0.000008* | Yes | M | 54 | U | yes |
| 134 | CFH | c.3643C>G p.(Arg1215Gly)                              | Type 2 (C-terminal) | [10] | 0.000008* | Yes | M | 68 | U | yes |
| 135 | CFH | c.3643C>G p.(Arg1215Gly)                              | Type 2 (C-terminal) | [10] | 0.000008* | Yes | M | 79 | U | yes |
| 136 | CFH | c.3643C>G p.(Arg1215Gly)                              | Type 2 (C-terminal) | [10] | 0.000008* | Yes | M | 50 | U | yes |
| 137 | CFH | c.3643C>G p.(Arg1215Gly)                              | Type 2 (C-terminal) | [10] | 0.000008* | Yes | M | 63 | U | yes |
| 138 | CFH | c.3572C>T p.(Ser1191Leu) and c.3590T>C p.(Val1197Ala) | Type 2 (C-terminal) | [19] | NA        | Yes | M | 28 | N | yes |
| 139 | CFH | c.3572C>T p.(Ser1191Leu) and c.3590T>C p.(Val1197Ala) | Type 2 (C-terminal) | [19] | NA        | Yes | F | 57 | U | no  |
| 140 | CFH | c.3572C>T p.(Ser1191Leu) and c.3590T>C p.(Val1197Ala) | Type 2 (C-terminal) | [19] | NA        | Yes | F | 60 | U | no  |
| 141 | CFH | c.3572C>T p.(Ser1191Leu) and c.3590T>C p.(Val1197Ala) | Type 2 (C-terminal) | [19] | NA        | Yes | M | 45 | U | yes |
| 142 | CFH | c.3572C>T p.(Ser1191Leu) and c.3590T>C p.(Val1197Ala) | Type 2 (C-terminal) | [19] | NA        | Yes | M | 46 | U | yes |
| 143 | CFH | c.3572C>T p.(Ser1191Leu) and c.3590T>C p.(Val1197Ala) | Type 2 (C-terminal) | [19] | NA        | Yes | M |    | U | no  |
| 144 | CFH | c.3572C>T p.(Ser1191Leu) and c.3590T>C p.(Val1197Ala) | Type 2 (C-terminal) | [19] | NA        | Yes | M | 45 | U | no  |
| 145 | CFH | c.3572C>T p.(Ser1191Leu) and c.3590T>C p.(Val1197Ala) | Type 2 (C-terminal) | [19] | NA        | Yes | F | 19 | U | no  |
| 146 | CFH | c.3572C>T p.(Ser1191Leu) and c.3590T>C p.(Val1197Ala) | Type 2 (C-terminal) | [19] | NA        | Yes | M | 5  | U | no  |
| 147 | CFH | c.3572C>T p.(Ser1191Leu) and c.3590T>C p.(Val1197Ala) | Type 2 (C-terminal) | [19] | NA        | Yes | M | 7  | U | no  |
| 148 | CFH | c.3572C>T p.(Ser1191Leu) and c.3590T>C p.(Val1197Ala) | Type 2 (C-terminal) | [19] | NA        | Yes | M | 7  | Y | yes |
| 149 | CFH | c.3674A>T, c.3675_3699del p.(Tyr1225*)                | Type 1              | -    | NA        | Yes | M | 1  | U | no  |
| 150 | CFH | c.3674A>T, c.3675_3699del p.(Tyr1225*)                | Type 1              | -    | NA        | Yes | M | 1  | U | no  |
| 151 | CFH | c.3674A>T, c.3675_3699del p.(Tyr1225*)                | Type 1              | -    | NA        | Yes | M | 1  | U | no  |
| 152 | CFH | c.3674A>T, c.3675_3699del p.(Tyr1225*)                | Type 1              | -    | NA        | Yes | M | 1  | U | no  |
| 153 | CFH | c.3674A>T, c.3675_3699del p.(Tyr1225*)                | Type 1              | -    | NA        | Yes | F | 1  | U | no  |

|     |       |                                                   |                     |      |           |     |   |    |   |     |
|-----|-------|---------------------------------------------------|---------------------|------|-----------|-----|---|----|---|-----|
| 154 | CFH   | c.3674A>T, c.3675_3699del p.(Tyr1225*)            | Type 1              | -    | NA        | Yes | F | 1  | U | no  |
| 155 | CFH   | c.3674A>T, c.3675_3699del p.(Tyr1225*)            | Type 1              | -    | NA        | Yes | F | 1  | U | no  |
| 156 | CFH   | c.3674A>T, c.3675_3699del p.(Tyr1225*)            | Type 1              | -    | NA        | Yes | M | 1  | U | no  |
| 157 | CFH   | c.3486del p.(Lys1162Asnfs*7)                      | Type 1              | -    | NA        | Yes | F |    | N | yes |
| 158 | CFH   | c.3486del p.(Lys1162Asnfs*7)                      | Type 1              | -    | NA        | Yes | F |    | N | yes |
| 159 | CFH   | c.3628C>T p.(Arg1210Cys)                          | Type 2 (C-terminal) | [10] | 0.015     | No  | F |    | N | yes |
| 160 | CFH   | c.2425C>T p.(Gln809*)                             | Type 1              | -    | NA        | No  | F | 24 | N | yes |
| 161 | CFH   | c.3551C>G p.(Thr1184Arg)                          | Type 2 (C-terminal) | -    | NA        | No  | M | 1  | Y | no  |
| 162 | CFH   | CFH:CFHR1 hybrid                                  | FH hybrid           | [19] | NA        | No  | F | 52 | Y | yes |
| 163 | CFH   | c.1160-2A>G                                       | Type 1              | -    | NA        | No  | F | 15 | U | yes |
| 164 | CFH   | c.3676C>G p.(Pro1226Ala)                          | Type 2 (C-terminal) | -    | NA        | No  | F | 26 | N | yes |
| 165 | CFH   | c.3628C>T p.(Arg1210Cys)                          | Type 2 (C-terminal) | [10] | 0.015     | No  | F | 1  | N | yes |
| 166 | CFH   | c.1107G>A; p.(Trp369*)                            | Type 1              | -    | NA        | No  | F | 27 | U | yes |
| 167 | CFH   | c.3643C>G p.(Arg1215Gly)                          | Type 2 (C-terminal) | [10] | 0.000008* | No  | F | 59 | U | yes |
| 168 | CFH   | c.3536T>C p.(Ile1179Thr)                          | Type 1              |      | NA        | Yes | F | 27 | U | yes |
| 169 | CFH   | CFH:CFHR1 hybrid                                  | FH hybrid           | [19] | NA        | No  | F |    | N | yes |
| 170 | CFH   | CFH:CFHR1 hybrid                                  | FH hybrid           | [19] | NA        | No  | M | 21 | Y | yes |
| 171 | CFH   | CFH:CFHR1 hybrid                                  | FH hybrid           | -    | NA        | No  | F |    | N | no  |
| 172 | CFHR1 | c.869T>C p.(Leu290Ser) and c.887C>T p.(Ala296Val) | CFHR1:CFH hybrid    | [39] | NA        | No  | M | 19 | Y |     |
| 173 | CFHR1 | c.869T>C p.(Leu290Ser) and c.887C>T p.(Ala296Val) | CFHR1:CFH hybrid    | [39] | NA        | No  | F | 14 | U | yes |
| 174 | CFHR1 | c.869T>C p.(Leu290Ser) and c.887C>T p.(Ala296Val) | CFHR1:CFH hybrid    | [39] | NA        | No  | F | 6  | Y | yes |
| 175 | CFHR1 | c.869T>C p.(Leu290Ser) and c.887C>T p.(Ala296Val) | CFHR1:CFH hybrid    | [39] | NA        | Yes | F | 42 | U | no  |
| 176 | CFHR1 | c.869T>C p.(Leu290Ser) and c.887C>T p.(Ala296Val) | CFHR1:CFH hybrid    | [39] | NA        | No  | F | 41 | U | yes |
| 177 | CFHR1 | c.869T>C p.(Leu290Ser) and c.887C>T p.(Ala296Val) | CFHR1:CFH hybrid    | [39] | NA        | No  | F | 55 | Y | yes |
| 178 | CFHR1 | c.869T>C p.(Leu290Ser) and c.887C>T p.(Ala296Val) | CFHR1:CFH hybrid    | [39] | NA        | No  | M | 68 | Y | no  |



|     |              |                                                   |                   |             |        |     |   |    |   |     |
|-----|--------------|---------------------------------------------------|-------------------|-------------|--------|-----|---|----|---|-----|
| 179 | <i>CFHR1</i> | c.869T>C p.(Leu290Ser) and c.887C>T p.(Ala296Val) | CFHR1:CFH hybrid  | [39]        | NA     | No  | F | 16 | Y | yes |
| 180 | <i>CFHR1</i> | c.869T>C p.(Leu290Ser) and c.887C>T p.(Ala296Val) | CFHR1:CFH hybrid  | [39]        | NA     | Yes | M | 23 | U | yes |
| 181 | <i>CFHR1</i> | c.869T>C p.(Leu290Ser) and c.887C>T p.(Ala296Val) | CFHR1:CFH hybrid  | [39]        | NA     | Yes | F | 14 | U | no  |
| 182 | <i>CFHR1</i> | c.869T>C p.(Leu290Ser) and c.887C>T p.(Ala296Val) | CFHR1:CFH hybrid  | [39]        | NA     | No  | M | 62 | Y | yes |
| 183 | <i>CFI</i>   | c.434G>A p.(Trp145*)                              | Type 1            | -           | NA     | No  | F | 32 | Y | yes |
| 184 | <i>CFI</i>   | c.859G>A p.(Gly287Arg)                            | Type 1            | [8]         | 0.0046 | No  | F | 4  | N | no  |
| 185 | <i>CFI</i>   | c.355G>A p.(Gly119Arg)                            | Type 1            | [41]        | 0.042  | No  | F | 55 | Y | yes |
| 186 | <i>CFI</i>   | CFI gene deletion                                 | Type 1            | -           | NA     | No  | M | 36 | N | yes |
| 187 | <i>CFI</i>   | c.859G>A p.(Gly287Arg)                            | Type 1            | [8]         | 0.0046 | No  | F | 22 | N | yes |
| 188 | <i>CFI</i>   | c.1555G>A p.(Asp519Asn)                           | Type 2            | [42]        | NA     | No  | F | 30 | U | yes |
| 189 | <i>CFI</i>   | c.1246A>C; p.(Ile416Leu)                          | Type 1            | [8, 43, 44] | 0.12   | No  | F | 29 | Y | no  |
| 190 | <i>CFI</i>   | c.1246A>C; p.(Ile416Leu)<br>Homozygous            | Type 1            | [8, 43, 44] | 0.12   | No  | M | 47 | Y | yes |
| 191 | <i>CFI</i>   | c.355G>A p.(Gly119Arg)                            | Type 1            | [41]        | 0.042  | No  | F | 28 | N | no  |
| 192 | <i>CFI</i>   | c.1019T>C p.(Ile340Thr)                           | Type 2            | [45]        | 0.0072 | No  | F |    | U |     |
| 193 | <i>CFI</i>   | c.893del p.(His298Leufs*18)                       | Type 1            | -           | NA     | Yes | M | 33 | Y | yes |
| 194 | <i>CFI</i>   | c.893del p.(His298Leufs*18)                       | Type 1            | -           | NA     | Yes | F | 9  | U | yes |
| 195 | <i>CFI</i>   | c.1246A>C; p.(Ile416Leu)                          | Type 1            | [8, 43, 44] | 0.12   | Yes | F | 16 | U | no  |
| 196 | <i>CFI</i>   | c.1246A>C; p.(Ile416Leu)                          | Type 1            | [8, 43, 44] | 0.12   | Yes | F | 19 | U | no  |
| 197 | <i>CFI</i>   | c.355G>A p.(Gly119Arg)                            | Type 1            | [41]        | 0.042  | No  | F | 6  | Y | no  |
| 198 | <i>CFI</i>   | c.1019C>T p.(Ile340Thr)                           | Type 2            | [45]        | 0.0072 | No  | F | 61 | Y | yes |
| 199 | <i>CFI</i>   | c.1195T>C p.(Trp399Arg)                           | Type 2            | [10]        | 0.0018 | No  | M | 57 | N | yes |
| 200 | <i>CFI</i>   | c.772G>A p.(Ala258Thr)                            | Type 1            | -           | 0.012  | No  | M | 51 | Y | yes |
| 201 | <i>CFI</i>   | c.1246A>C p.(Ile416Leu)                           | Type 1            | [10]        | 0.12   | No  | M | 41 | N | yes |
| 202 | <i>CD46</i>  | c.565T>G p.(Tyr189Asp)                            | Pathogenic Type 1 | [46]        | 0.0018 | No  | M | 42 | U | yes |
| 203 | <i>CD46</i>  | c.286+2T>G                                        | Pathogenic Type 1 | [46]        | 0.0052 | No  | M | 12 | N | no  |
| 204 | <i>CD46</i>  | c.470G>A p.(Cys157Tyr)                            | Pathogenic Type 1 | -           | NA     | Yes | M | 3  | Y | no  |
| 205 | <i>CD46</i>  | c.470G>A p.(Cys157Tyr)                            | Pathogenic Type 1 | -           | NA     | Yes | M | 15 | Y | no  |
| 206 | <i>CD46</i>  | c.475+1G>A                                        | Pathogenic Type 1 | -           | 0.0004 | No  | M |    | U |     |
| 207 | <i>CD46</i>  | c.286+2T>G                                        | Pathogenic Type 1 | [46]        | 0.0052 | No  | F | 26 | U | no  |
| 208 | <i>CD46</i>  | c.565T>G p.(Tyr189Asp)                            | Pathogenic Type 1 | [46]        | 0.0018 | No  | F | 8  | U | no  |

|     |      |                                                                                |                   |         |                  |     |   |    |     |     |
|-----|------|--------------------------------------------------------------------------------|-------------------|---------|------------------|-----|---|----|-----|-----|
| 209 | CD46 | c.130A>C p.(Met44Leu)                                                          | Pathogenic Type 1 | -       | 0.037            | No  | F | 32 | U   | no  |
| 210 | CD46 | c.286+2T>G                                                                     | Pathogenic Type 1 | [46]    | 0.0052           | No  | F | 8  | Y   | no  |
| 211 | CD46 | c.287-2A>G                                                                     | Pathogenic Type 1 | [8, 46] | 0.0025           | No  | M | 24 | Y   | no  |
| 212 | CD46 | c.175C>T p.(Arg59*)                                                            | Pathogenic Type 1 | [47]    | 0.0012           | No  | M | 21 | Y   | no  |
| 213 | CD46 | c.286+2T>G, and<br>c.1007_1015delinsTTTGGA<br>(p.Glu336_Leu339delinsValTrpIle) | Pathogenic Type 1 | [46]    | 0.0052<br>and NA | No  | F | 34 | N   | no  |
| 214 | CD46 | c.686G>A p.(Arg229Gln)                                                         | Pathogenic Type 1 | -       | 0.0046           | No  | M | 13 | U   | yes |
| 215 | CD46 | c.286+2T>G                                                                     | Pathogenic Type 1 | [46]    | 0.0052           | No  | F | 38 | N   | no  |
| 216 | CD46 | c.191G>T p.(Cys64Phe)                                                          | Pathogenic Type 1 | [48]    | NA               | No  | M | 44 | Y   | no  |
| 217 | CD46 | c.191G>T p.(Cys64Phe)                                                          | Pathogenic Type 1 | [48]    | NA               | No  | M | 16 | Y   | no  |
| 218 | CD46 | c.286+2T>G                                                                     | Pathogenic Type 1 | [46]    | 0.0052           | Yes | M | 5  | Y   | no  |
| 219 | CD46 | c.565T>G p.(Tyr189Asp)                                                         | Pathogenic Type 1 | [46]    | 0.0018           | No  | F | 8  | N   | no  |
| 220 | CD46 | c.286+2T>G                                                                     | Pathogenic Type 1 | [46]    | 0.0052           | Yes | F | 25 | Y   | no  |
| 221 | CD46 | c.286+2T>G                                                                     | Pathogenic Type 1 | [46]    | 0.0052           | Yes | M | 25 | U   | no  |
| 222 | CD46 | c.286+2T>G                                                                     | Pathogenic Type 1 | [46]    | 0.0052           | Yes | M | 30 | Y   | yes |
| 223 | CD46 | c.286+2T>G                                                                     | Pathogenic Type 1 | [46]    | 0.0052           | Yes | M | 28 | U   | no  |
| 224 | CD46 | c.565T>G p.(Tyr189Asp)                                                         | Pathogenic Type 1 | [46]    | 0.0018           | Yes | M |    | U   |     |
| 225 | CD46 | c.565T>G p.(Tyr189Asp)                                                         | Pathogenic Type 1 | [46]    | 0.0018           | Yes | M |    | U   |     |
| 226 | CD46 | c.286+2T>G                                                                     | Pathogenic Type 1 | [46]    | 0.0052           | No  | F | 57 | N   | yes |
| 227 | CD46 | c.286+2T>G                                                                     | Pathogenic Type 1 | [46]    | 0.0052           | No  | M | 37 | U   | no  |
| 228 | CD46 | c.175C>T p.(Arg59*)                                                            | Pathogenic Type 1 | [47]    | 0.0012           | No  | F |    | Y   |     |
| 229 | CD46 | c.350A>G p.(Tyr117Cys)                                                         | Pathogenic Type 1 | -       | NA               | No  | M | 27 | N   | yes |
| 230 | CD46 | c.857-2A>C                                                                     | Pathogenic Type 1 | -       | 0.00071          | No  | F | 42 | N   | yes |
| 231 | CD46 | c.286+2T>G                                                                     | Pathogenic Type 1 | [46]    | 0.0052           | No  | M | 7  | N   | no  |
| 232 | CD46 | deletion exons 2-3                                                             | Pathogenic Type 1 | -       | NA               | No  | F | 33 | Y   | no  |
| 233 | CD46 | c.351C>G p.(Tyr117*)                                                           | Pathogenic Type 1 | -       | NA               | No  | F | 1  | Y   | no  |
| 234 | CD46 | c.565T>G p.(Tyr189Asp)                                                         | Pathogenic Type 1 | [46]    | 0.0018           | No  | M | 15 | N   | no  |
| 235 | CD46 | c.191G>T p.(Cys64Phe)                                                          | Pathogenic Type 1 | [48]    | NA               | No  | F | 6  | N   | no  |
| 236 | CD46 | c.476-1G>A                                                                     | Pathogenic Type 1 | -       | NA               | No  | F | 5  | FFP | no  |
| 237 | CD46 | c.286+2T>G                                                                     | Pathogenic Type 1 | [46]    | 0.0052           | No  | M | 13 | Y   | no  |
| 238 | CD46 | c.175C>T p.(Arg59*)                                                            | Pathogenic Type 1 | [47]    | 0.0012           | No  | M | 17 | N   | no  |
| 239 | CD46 | c.191G>T p.(Cys64Phe)                                                          | Pathogenic Type 1 | [48]    | NA               | Yes | M | 25 | Y   | no  |
| 240 | CD46 | c.718T>C p.(Ser240Pro)                                                         | Pathogenic Type 2 | [50]    | 0.00071          | Yes | M | 8  | N   | no  |

|     |      |                                      |                   |      |                      |     |   |    |     |     |
|-----|------|--------------------------------------|-------------------|------|----------------------|-----|---|----|-----|-----|
| 241 | CD46 | c.718T>C p.(Ser240Pro)               | Pathogenic Type 2 | [50] | 0.00071              | Yes | M | 15 | Y   | no  |
| 242 | CD46 | c.718T>C p.(Ser240Pro)<br>Homozygous | Pathogenic Type 2 | [50] | 0.00071              | Yes | M | 17 | FFP | no  |
| 243 | CD46 | c.718T>C p.(Ser240Pro)<br>Homozygous | Pathogenic Type 2 | [50] | 0.00071              | Yes | F | 9  | Y   | no  |
| 244 | CD46 | c.811_816del<br>p.(Asp271_Ser272del) | Pathogenic Type 1 | -    | NA                   | Yes | M | 31 | U   | yes |
| 245 | CD46 | c.811_816del<br>p.(Asp271_Ser272del) | Pathogenic Type 1 | -    | NA                   | Yes | M | 27 | U   | yes |
| 246 | CD46 | c.811_816del<br>p.(Asp271_Ser272del) | Pathogenic Type 1 | -    | NA                   | Yes | M | 35 | U   | Yes |
| 247 | CD46 | c.287-2A>G                           | Pathogenic Type 1 | [47] | 0.0025               | No  | M | 3  | Y   | no  |
| 248 | CD46 | c.475+1G>A<br>Homozygous             | Pathogenic Type 1 | -    | 0.0004               | No  | M | 8  | N   | no  |
| 249 | CD46 | c.198del p.(Gly67Aspfs*40)           | Pathogenic Type 1 | -    | NA                   | No  | M | 3  | Y   | no  |
| 250 | CD46 | c.736T>A p.(Phe246Ile)<br>Homozygous | Pathogenic Type 1 | -    | NA                   | Yes | M | 12 | U   | no  |
| 251 | CD46 | c.736T>A p.(Phe246Ile)<br>Homozygous | Pathogenic Type 1 | -    | NA                   | Yes | M | 15 | U   | no  |
| 252 | CD46 | c.736T>A p.(Phe246Ile)<br>Homozygous | Pathogenic Type 1 | -    | NA                   | Yes | M | 14 | U   | no  |
| 253 | CD46 | c.736T>A p.(Phe246Ile)<br>Homozygous | Pathogenic Type 1 | -    | NA                   | Yes | M | 10 | U   | no  |
| 254 | CD46 | c.191G>T p.(Cys64Phe)                | Pathogenic Type 1 | [48] | NA                   | No  | M | 41 | Y   | no  |
| 255 | CD46 | c.191G>T p.(Cys64Phe)                | Pathogenic Type 1 | [48] | NA                   | No  | F | 33 | Y   | no  |
| 256 | CD46 | c.565T>G p.(Tyr189Asp)               | Pathogenic Type 1 | [46] | 0.0018               | No  | M | 26 | Y   | no  |
| 257 | CD46 | c.388G>A p.(Gly130Ser)               | Pathogenic Type 1 | -    | NA                   | No  | F | 1  | N   | no  |
| 258 | CD46 | c.191G>T p.(Cys64Phe)                | Pathogenic Type 1 | -    | NA                   | No  | F | 11 | N   | no  |
| 259 | CD46 | c.946+24T>G                          | Pathogenic Type 1 | -    | 0.003                | No  | F | 44 | Y   | no  |
| 260 | CD46 | c.175C>T p.(Arg59*)                  | Pathogenic Type 1 | -    | 0.0012               | No  | M | 6  | U   | no  |
| 261 | CD46 | c.191G>T p.(Cys64Phe)                | Pathogenic Type 1 | [48] | NA                   | Yes | M | 26 | N   | no  |
| 262 | CD46 | c.632delG p.(Gly211Valfs*22)         | Pathogenic Type 1 | -    | 0.0004               | Yes | F | 44 | N   | no  |
| 263 | C3   | c.1775G>A p.(Arg592Gln)              | Pathogenic        | [54] | 0.00004 <sup>5</sup> | No  | F | 2  | FFP | yes |
| 264 | C3   | c.1775G>T p.(Arg592Leu)              | Pathogenic        | [54] | NA                   | No  | M | 33 | Y   | yes |
| 265 | C3   | c.193A>C p.(Lys65Gln)                | Pathogenic        | [55] | 0.0048               | No  | F | 24 | Y   | yes |
| 266 | C3   | c.193A>C p.(Lys65Gln)                | Pathogenic        | [55] | 0.0048               | No  | M | 5  | Y   | yes |
| 267 | C3   | c.193A>C p.(Lys65Gln)                | Pathogenic        | [55] | 0.0048               | No  | F | 30 | Y   | yes |
| 268 | C3   | c.193A>C p.(Lys65Gln)                | Pathogenic        | [55] | 0.0048               | No  | M | 62 | Y   | yes |
| 269 | C3   | c.193A>C p.(Lys65Gln)                | Pathogenic        | [55] | 0.0048               | No  | F | 43 | Y   | yes |

|     |      |                                                                                |                                                           |          |                      |     |   |    |     |     |
|-----|------|--------------------------------------------------------------------------------|-----------------------------------------------------------|----------|----------------------|-----|---|----|-----|-----|
| 272 | C3   | c.3124C>G p.(Arg1042Gly)                                                       | Pathogenic                                                | [56]     | NA                   | No  | M | 1  | U   | yes |
| 273 | C3   | c.3343G>A p.(Asp1115Asn)                                                       | Pathogenic                                                | [54, 57] | NA                   | Yes | F | 20 | Y   | yes |
| 274 | C3   | c.3343G>A p.(Asp1115Asn)                                                       | Pathogenic                                                | [54, 57] | NA                   | Yes | F | 53 | N   | yes |
| 276 | C3   | c.463A>C p.(Lys155Gln)                                                         | Pathogenic                                                | [58]     | 0.27                 | No  | M |    | U   |     |
| 278 | C3   | c.481C>T p.(Arg161Trp)                                                         | Pathogenic                                                | [59]     | 0.0004               | No  | M | 33 | N   | yes |
| 279 | C3   | c.485C>G p.(Thr162Arg)                                                         | Pathogenic                                                | -        | NA                   | Yes | M | 3  | FFP | yes |
| 280 | C3   | c.1774C>T p.(Arg592Trp)                                                        | Pathogenic                                                | [54]     | 0.0004               | Yes | M | 40 | U   | yes |
| 281 | C3   | c.1774C>T p.(Arg592Trp)                                                        | Pathogenic                                                | [54]     | 0.0004               | Yes | F | 21 | U   | yes |
| 282 | C3   | c.1774C>T p.(Arg592Trp)                                                        | Pathogenic                                                | [54]     | 0.0004               | Yes | M | 1  | U   | yes |
| 283 | C3   | c.3481C>A p.(Gln1161Lys)                                                       | Pathogenic                                                | [54]     | NA                   | No  | M | 1  | N   | no  |
| 285 | C3   | c.193A>C p.(Lys65Gln)                                                          | Pathogenic                                                | [55]     | 0.0048               | No  | F | 31 | U   | yes |
| 286 | C3   | c.1775G>A p.(Arg592Gln)                                                        | Pathogenic                                                | [54, 60] | 0.00004 <sup>§</sup> | Yes | F | 28 | Y   | no  |
| 287 | C3   | c.1775G>A p.(Arg592Gln)                                                        | Pathogenic                                                | [54, 60] | 0.00004 <sup>§</sup> | Yes | F | 3  | U   | no  |
| 289 | C3   | c.1774C>T p.(Arg592Trp)                                                        | Pathogenic                                                | [54]     | 0.0004               | No  | M | 33 | N   | no  |
| 290 | C3   | c.1774C>T p.(Arg592Trp)                                                        | Pathogenic                                                | [54]     | 0.0004               | Yes | F | 21 | U   | yes |
| 291 | C3   | c.1774C>T p.(Arg592Trp)                                                        | Pathogenic                                                | [54]     | 0.0004               | Yes | F | 24 | U   | yes |
| 292 | C3   | c.193A>C p.(Lys65Gln)                                                          | Pathogenic                                                | [55]     | 0.0048               | No  | F | 60 | N   | yes |
| 25  | DGKE | c.463A>G p.(Arg155Gly) and<br>c.1427T>C p.(Leu476Pro)<br>Compound heterozygous | <i>In silico</i> analysis                                 | -        | 0.00041<br>and NA    | Yes | F | 2  | U   | no  |
| 293 | DGKE | c.463A>G p.(Arg155Gly) and<br>c.1427T>C p.(Leu476Pro)<br>Compound heterozygous | <i>In silico</i> analysis                                 | -        | 0.00041<br>and NA    | Yes | F | 1  | U   | no  |
| 26  | DGKE | c.826del p.(Val276Phefs*8)<br>Homozygous                                       | <i>In silico</i> analysis                                 | -        | NA                   | Yes | F | 1  | Y   | no  |
| 294 | DGKE | c.826del p.(Val276Phefs*8)<br>Homozygous                                       | <i>In silico</i> analysis                                 | -        | NA                   | Yes | M | U  | U   | no  |
| 295 | DGKE | c.826del p.(Val276Phefs*8)<br>Homozygous                                       | <i>In silico</i> analysis                                 | -        | NA                   | Yes | F | U  | U   | no  |
| 296 | DGKE | c.826del p.(Val276Phefs*8)<br>Homozygous                                       | <i>In silico</i> analysis                                 | -        | NA                   | Yes | F | U  | U   | no  |
| 27  | DGKE | c.1597A>C p.(Thr533Pro)<br>Homozygous                                          | <i>In silico</i> analysis                                 | -        | 0.0012               | Yes | M | 1  | N   | yes |
| 28  | DGKE | c.1A>T p.(Met1Leu)<br>Homozygous                                               | <i>In silico</i> analysis                                 | -        | NA                   | No  | F | U  | U   | U   |
| 30  | DGKE | c.393C>G p.(Asn131Lys) and<br>c.465-2A>G<br>Compound heterozygous              | <i>In silico</i> analysis<br>and RNA studies <sup>β</sup> | [61]     | NA                   | no  | F | 1  | N   | no  |
| 33  | DGKE | c.966G>A p.(Trp322*)                                                           | <i>In silico</i> analysis                                 | [62]     | 0.0099               | No  | F | 1  | N   | no  |

|      |      | Homozygous                                                      |       |                                                           |          |                                   |                   |     |                 |     |      |
|------|------|-----------------------------------------------------------------|-------|-----------------------------------------------------------|----------|-----------------------------------|-------------------|-----|-----------------|-----|------|
| 34   | DGKE | c.1647_1650del<br>p.(Thr550Metfs*13)<br>Homozygous              |       | <i>In silico</i> analysis                                 | -        | NA                                | No                | M   | 8               | N   | no   |
| 38   | DGKE | c.966G>A p.(Trp322*)<br>Homozygous                              |       | <i>In silico</i> analysis                                 | [62]     | 0.0099                            | No                | M   | 1               | Y   | no   |
| 39   | DGKE | c.966G>A p.(Trp322*) and<br>c.465-2A>G<br>Compound heterozygous |       | <i>In silico</i> analysis<br>and RNA studies <sup>β</sup> | [61, 62] | 0.0099<br>and NA                  | No                | F   | 2               | N   | no   |
| FHAA |      | Copy number                                                     |       | FHAA titre at<br>presentation <sup>α</sup>                | Refs     | #Populati<br>on<br>frequency<br>% | Family<br>history | Sex | Age at<br>onset | PEX | ESRD |
|      |      | CFHR1                                                           | CFHR3 |                                                           |          |                                   |                   |     |                 |     |      |
| 2    | FHAA | 0                                                               | 0     | 1010                                                      | -        | -                                 | No                | M   | 11              | Y   | no   |
| 4    | FHAA | 0                                                               | 1     | 1249                                                      | -        | -                                 | No                | F   | 4               | Y   | yes  |
| 5    | FHAA | 0                                                               | 0     | 573                                                       | -        | -                                 | No                | F   | 11              | Y   | yes  |
| 6    | FHAA | 2                                                               | 2     | 2017                                                      | -        | -                                 | No                | M   | 8               | Y   | yes  |
| 10   | FHAA | 0                                                               | 1     | 3432                                                      | -        | -                                 | No                | M   | 7               | Y   | no   |
| 12   | FHAA | 0                                                               | 0     | 812                                                       | -        | -                                 | No                | F   | 10              | Y   | yes  |
| 17   | FHAA | 0                                                               | 0     | 2194                                                      | -        | -                                 | No                | M   | 9               | Y   | no   |
| 18   | FHAA | 0                                                               | 0     | 2130                                                      | -        | -                                 | No                | M   | 5               | Y   | no   |
| 19   | FHAA | 2                                                               | 2     | 2319                                                      | -        | -                                 | No                | M   | 10              | N   | yes  |
| 21   | FHAA | 0                                                               | 0     | 971                                                       | -        | -                                 | No                | M   | 16              | Y   | no   |
| 22   | FHAA | 2                                                               | 2     | 277                                                       | -        | -                                 | No                | F   | 8               | N   | yes  |
| 23   | FHAA | 0                                                               | 0     | 1350                                                      | -        | -                                 | No                | M   | 6               | Y   | no   |
| 297  | FHAA | 0                                                               | 0     | >4000                                                     | -        | -                                 | No                | M   | 38              | N   | yes  |
| 298  | FHAA | 0                                                               | 0     | 1100                                                      | -        | -                                 | No                | F   | 7               | Y   | no   |
| 299  | FHAA | 0                                                               | 1     | 664                                                       | -        | -                                 | No                | F   | 8               | N   | yes  |
| 300  | FHAA | 0                                                               | 0     | 2491                                                      | -        | -                                 | No                | F   | 22              | N   | yes  |
| 301  | FHAA | 1                                                               | 1     | 470                                                       | -        | -                                 | No                | F   | 17              | Y   | no   |
| 302  | FHAA | 1                                                               | 1     | 1752                                                      | -        | -                                 | No                | M   | 42              | N   | no   |
| 303  | FHAA | 0                                                               | 0     | 804                                                       | -        | -                                 | No                | F   | 14              | Y   | no   |
| 304  | FHAA | 0                                                               | 0     | 465                                                       | -        | -                                 | No                | M   | 10              | U   | yes  |
| 305  | FHAA | 1                                                               | 2     | 572                                                       | -        | -                                 | No                | M   | 67              | Y   | no   |
| 306  | FHAA | 0                                                               | 0     | 2109                                                      | -        | -                                 | No                | M   | 5               | Y   | no   |
| 307  | FHAA | 1                                                               | 1     | >4000                                                     | -        | -                                 | No                | F   | 6               | N   | no   |
| 308  | FHAA | 2                                                               | 2     | 3+                                                        | -        | -                                 | No                | M   | 6               | U   | yes  |
| 309  | FHAA | 0                                                               | 0     | 645                                                       | -        | -                                 | No                | M   |                 | N   |      |

|     |      |                        |          |                   |      |        |     |   |    |   |     |
|-----|------|------------------------|----------|-------------------|------|--------|-----|---|----|---|-----|
| 310 | FHAA | 1                      | 1        | 449               | -    | -      | No  | M | 64 | N | no  |
| 311 | FHAA | 2                      | 2        | 162               | -    | -      | No  | M | 24 | Y | no  |
| 312 | FHAA | 2                      | 2        | 600-1199          | -    | -      | No  | M | 1  | Y | yes |
| 313 | FHAA | 0                      | 0        | Low titre         | -    | -      | No  | F | 16 | Y | no  |
| 314 | CFH  | c.2596+1G>C            |          | Type 1            | -    | 0.0004 | No  | F | 30 | Y | yes |
|     | CFI  | c.355G>A p.(Gly119Arg) |          | Type 1            | [41] | 0.042  |     |   |    |   |     |
| 315 | CFH  | c.3511C>T p.(Arg1171*) |          | Type 1            | -    | NA     | No  | F | 1  | Y | no  |
|     | CD46 | c.286+2T>G             |          | Pathogenic Type 1 | [46] | 0.0052 |     |   |    |   |     |
| 316 | CFH  | CFH:CFHR1 hybrid       |          | FH hybrid         | -    | NA     | Yes | F | U  | U | yes |
|     | CD46 | c.133dupG p.(Glu45fs)  |          | Pathogenic Type 1 | -    | NA     |     |   |    |   |     |
| 317 | CFI  | c.772G>A p.(Ala258Thr) |          | Type 1            | [14] | 0.012  | No  | F | 17 | Y | yes |
|     | FHAA | CFHR1: 2               | CFHR3: 2 | Titre 622         | -    | -      |     |   |    |   |     |

**eTable 3:** Genetic and clinical data for the eculizumab treated cohort.

| Patient Number   | C' Gene | Mutation                                              | Pathogenicity       | Function Refs | #Population frequency % | Family history | Sex | Age at onset | PEX | ESRD |
|------------------|---------|-------------------------------------------------------|---------------------|---------------|-------------------------|----------------|-----|--------------|-----|------|
| 318              | CFH     | c.3572C>T p.(Ser1191Leu) and c.3590T>C p.(Val1197Ala) | Type 2 (C-terminal) | [19]          | NA                      | Yes            | M   | 31           | Y   | yes  |
| 319              | CFH     | c.2836dupT p.(Ser946fs)                               | Type 1              | -             | NA                      | No             | F   | 23           | Y   | no   |
| 320              | CFH     | c.213G>A p.(Trp71*)                                   | Type 1              | -             | 0.0004                  | No             | F   | 24           | Y   | yes  |
| 321 <sup>§</sup> | CFH     | CFH:CFHR3 hybrid                                      | FH Hybrid           | [19]          | NA                      | No             | M   | 1            | Y   | yes  |
| 322 <sup>§</sup> | CFH     | CFH:CFHR1 hybrid                                      | FH hybrid           | [19]          | NA                      | No             | M   | 1            | Y   | no   |
| 323              | CFH     | c.1106G>A p.(Trp369*)                                 | Type 1              | -             | NA                      | No             | F   | 41           | Y   | yes  |
| 324              | CFH     | c.157C>T p.(Arg53Cys)                                 | Type 2 (N-terminal) | [64]          | 0.0021                  | No             | F   | 25           | Y   | no   |
| 325              | CFH     | c.158G>A p.(Arg53His)                                 | Type 2 (N-terminal) | [65]          | 0.000032 <sup>α</sup>   | No             | F   | 37           | N   | no   |
| 326 <sup>§</sup> | CFH     | c.1933del p.(Thr645Argfs*20)                          | Type 1              | -             | NA                      | No             | F   | 34           | Y   | no   |
| 327              | CFH     | c.2383G>A p.(Gly795Arg) and c.965-1G>A                | Type 1              | -             | NA                      | No             | F   | 22           | Y   | yes  |
| 328              | CFH     | c.2918G>A p.(Cys973Tyr). Homozygous                   | Type 1              | [3]           | NA                      | Yes            | F   | 1            | N   | no   |
| 329              | CFH     | c.3357C>G p.(Asp1119Glu) and c.3643C>T p.(Arg1215*)   | Type 1              | -             | 0.0011 and 0.0004       | No             | F   | 2            | Y   | no   |
| 330              | CFH     | c.3570T>G p.(Tyr1190*)                                | Type 1              | -             | NA                      | No             | M   | 34           | Y   | no   |
| 331              | CFH     | c.3572C>T p.(Ser1191Leu)                              | Type 2 (C-terminal) | [10]          | NA                      | Yes            | F   | 18           | Y   | no   |
| 332              | CFH     | c.3572C>T p.(Ser1191Leu)                              | Type 2 (C-terminal) | [10]          | NA                      | Yes            | F   | 30           | Y   | no   |
| 333 <sup>§</sup> | CFH     | c.3602G>T p.(Cys1201Phe)                              | Type 1              | -             | NA                      | No             | M   | 33           | Y   | yes  |
| 334              | CFH     | c.3616C>T p.(Arg1206Cys)                              | Type 2 (C-terminal) | [13]          | NA                      | No             | F   | 25           | Y   | no   |
| 335 <sup>§</sup> | CFH     | c.3643C>G p.(Arg1215Gly)                              | Type 2 (C-terminal) | [10]          | 0.000008*               | Yes            | M   | 2            | Y   | no   |
| 336              | CFH     | c.3643C>G p.(Arg1215Gly)                              | Type 2 (C-terminal) | [10]          | 0.000008*               | Yes            | F   | 20           | Y   | no   |
| 337              | CFH     | c.3643C>G p.(Arg1215Gly)                              | Type 2 (C-terminal) | [10]          | 0.000008*               | Yes            | F   | 22           | N   | no   |
| 338 <sup>§</sup> | CFH     | c.3644G>A p.(Arg1215Gln)                              | Type 2 (C-terminal) | [10]          | 0.000008*               | No             | F   | 19           | Y   | no   |
| 339              | CFH     | c.619+1G>A                                            | Type 1              | -             | NA                      | No             | F   | 25           | Y   | no   |
| 340 <sup>§</sup> | CFH     | c.942G>A p.(Trp314*)                                  | Type 1              | -             | NA                      | No             | F   | 28           | U   | no   |
| 341              | CFH     | CFH::CFHR3 hybrid                                     | FH Hybrid           | [19]          | NA                      | Yes            | F   | 20           | Y   | no   |
| 342              | CFH     | c.3628C>T p.(Arg1210Cys)                              | Type 2 (C-terminal) | [10]          | 0.015                   | No             | M   | 24           | N   | yes  |
| 343 <sup>§</sup> | CFH     | CFH::CFHR3 hybrid                                     | FH Hybrid           | [19]          | NA                      | Yes            | F   | 1            | Y   | no   |
| 344 <sup>¶</sup> | CFH     | c.3691del p.(Arg1231Aspfs*40)                         | Type 1              | -             | NA                      | Yes            | M   | 38           | Y   | yes  |
| 345              | CFH     | c.3691del p.(Arg1231Aspfs*40)                         | Type 1              | -             | NA                      | Yes            | F   | 1            | N   | no   |
| 346              | CFH     | c.415C>T p.(Pro139Ser)                                | Type 1              | -             | NA                      | No             | F   | 30           | U   | no   |
| 347              | CFH     | c.3572C>T p.(Ser1191Leu)                              | Type 2 (C-terminal) | [10]          | NA                      | No             | F   | 16           | Y   | no   |

|                  |              |                                                        |                                |                |                     |     |   |    |   |     |
|------------------|--------------|--------------------------------------------------------|--------------------------------|----------------|---------------------|-----|---|----|---|-----|
| 348              | <i>CFH</i>   | c.3644G>A, p.(Arg1215Gln)                              | Type 2 (C-terminal)            | -              | 0.000008*           | No  | F | 50 | Y | no  |
| 349              | <i>CFH</i>   | c.3617G>A p.(Arg1206His)                               | Type 2 (C-terminal)            | [13]           | NA                  | No  | M | 20 | Y | no  |
| 350              | <i>CFH</i>   | c.2918G>A p.(Cys973Tyr).<br>Homozygous                 | Type 1                         | [3]            | NA                  | Yes | M | 2  | N | no  |
| 351              | <i>CFHR1</i> | c.869T>C p.(Leu290Ser) and<br>c.887C>T p.(Ala296Val)   | CFHR1:CFH hybrid               | [39]           | NA                  | Yes | F | 25 | Y | no  |
| 352              | <i>CFI</i>   | c.651del p.(Ala219Glnfs*12)                            | Type 1                         | -              | NA                  | No  | F | 67 | Y | no  |
| 353              | <i>CFI</i>   | c.1402A>G p.(Ile468Val) and<br>c.1642G>C p.(Glu548Gln) | Type 1                         | -              | 0.0032 and<br>0.082 | No  | M | 4  | N | no  |
| 354              | <i>CFI</i>   | c.148C>G p.(Pro50Ala)                                  | Type 1                         | [10]           | 0.0096              | No  | F | 64 | Y | no  |
| 355              | <i>CFI</i>   | c.355G>A p.(Gly119Arg) and<br>c.859G>A p.(Gly287Arg)   | Type 1                         | -              | 0.042 and<br>0.0046 | No  | M | 48 | N | no  |
| 356              | <i>CFI</i>   | c.454G>A p.(Val152Met)                                 | Type 1                         | -              | 0.0042              | No  | F | 45 | Y | no  |
| 357              | <i>CFI</i>   | c.1246A>C; p.(Ile416Leu)                               | Type 1                         | [8, 43,<br>44] | 0.12                | No  | F | 21 | Y | no  |
| 358              | <i>CD46</i>  | c.718T>C p.(Ser240Pro)                                 | Pathogenic Type 2              | [50]           | 0.00071             | No  | M | 39 | N | yes |
| 359              | <i>CD46</i>  | c.286+2T>G                                             | Pathogenic Type 1              | [46]           | 0.0052              | No  | M | 18 | Y | no  |
| 360              | <i>CD46</i>  | c.646T>G p.(Trp216Gly)                                 | Pathogenic Type 1              | -              | 0.0004              | Yes | M | 27 | Y | no  |
| 361              | <i>CD46</i>  | c.97+2_97+12del                                        | Pathogenic Type 1              | -              | NA                  | No  | F | 8  | N | no  |
| 362              | <i>CD46</i>  | c.808T>C p.(Cys270Arg)                                 | Pathogenic Type 1              | -              | NA                  | No  | F | 4  | N | no  |
| 363              | <i>CD46</i>  | c.97+2_97+12del                                        | Pathogenic Type 1              | -              | NA                  | No  | M | 34 | Y | no  |
| 364              | <i>CD46</i>  | c.286+2T>G                                             | Pathogenic Type 1              | [46]           | 0.0052              | No  | F | 20 | Y | no  |
| 365              | <i>CD46</i>  | c.286+2T>G                                             | Pathogenic Type 1              | [46]           | 0.0052              | No  | M | 47 | Y | no  |
| 366 <sup>§</sup> | <i>CD46</i>  | c.175C>T p.(Arg59*)                                    | Pathogenic Type 1              | [47]           | 0.0012              | No  | M | 31 | N | no  |
| 367              | <i>CD46</i>  | c.286+2T>G                                             | Pathogenic Type 1              | [46]           | 0.0052              | No  | M | 26 | Y | no  |
| 368              | <i>CD46</i>  | c.389+5G>A                                             | Pathogenic Type 1 <sup>β</sup> | -              | NA                  | No  | F | 40 | Y | no  |
| 369              | <i>CD46</i>  | c.286+2T>G                                             | Pathogenic Type 1              | [46]           | 0.0052              | No  | M | 36 | Y | no  |
| 370 <sup>§</sup> | <i>CD46</i>  | c.286+2T>G and 286+2T>C                                | Pathogenic Type 1              | [46]           | 0.0052              | No  | F | 1  | U | no  |
| 371 <sup>§</sup> | <i>CD46</i>  | c.104G>A p.(Cys35Tyr)                                  | Pathogenic Type 1              | -              | 0.0012              | No  | M | 1  | N | no  |
| 372 <sup>§</sup> | <i>CD46</i>  | c.390-2A>G                                             | Pathogenic Type 1              | -              | NA                  | No  | F | 27 | Y | no  |
| 373 <sup>§</sup> | <i>CD46</i>  | c.646T>G p.(Trp216Gly)                                 | Pathogenic Type 1              | -              | 0.0004              | Yes | F | 14 | N | no  |
| 374              | <i>CD46</i>  | c.632delG p.(Gly211Valfs*22)                           | Pathogenic Type 1              | -              | 0.0004              | Yes | F | 22 | Y | no  |
| 375              | <i>CD46</i>  | c.286+2T>G                                             | Pathogenic Type 1              | [46]           | 0.0052              | Yes | M | 5  | Y | no  |
| 376 <sup>§</sup> | <i>CD46</i>  | c.286+2T>G                                             | Pathogenic Type 1              | [46]           | 0.0052              | No  | F | 8  | N | no  |
| 377              | <i>CD46</i>  | c.776del p.(Gly259Valfs*39)                            | Pathogenic Type 1              | -              | NA                  | No  | F | 2  | U | no  |
| 378              | <i>CD46</i>  | c.185A>G p.(Tyr62Cys)                                  | Pathogenic Type 1              | -              | 0.0004              | No  | F | 27 | Y | no  |
| 379 <sup>§</sup> | <i>CD46</i>  | c.565T>G; p.(Tyr189Asp)                                | Pathogenic Type 1              | [46]           | 0.0018              | No  | M | 5  | N | no  |
| 380              | <i>CD46</i>  | c.175C>T p.(Arg59*)                                    | Pathogenic Type 1              | [47]           | 0.0012              | No  | F | 11 | N | no  |
| 381              | <i>C3</i>    | c.193A>C p.(Lys65Gln)                                  | Pathogenic                     | [55]           | 0.0048              | No  | F | 32 | Y | yes |



| 382              | C3   | c.193A>C p.(Lys65Gln)                   | Pathogenic                                                | [55]                                       | 0.0048        | No                         | M                 | 11  | N               | no  |      |
|------------------|------|-----------------------------------------|-----------------------------------------------------------|--------------------------------------------|---------------|----------------------------|-------------------|-----|-----------------|-----|------|
| 383              | C3   | c.485C>G p.(Thr162Arg)                  | Pathogenic                                                | -                                          | NA            | Yes                        | F                 | 51  | N               | yes |      |
| 384              | C3   | c.3124C>G p.(Arg1042Gly)                | Pathogenic                                                | [56]                                       | NA            | No                         | M                 | 1   | N               | no  |      |
| 385              | C3   | c.3470T>C p.(Ile1157Thr)                | Pathogenic                                                | [68]                                       | NA            | No                         | F                 | 2   | N               | no  |      |
| 386              | C3   | c.193A>C p.(Lys65Gln)                   | Pathogenic                                                | [55]                                       | 0.0048        | No                         | M                 | 26  | Y               | no  |      |
| 387 <sup>s</sup> | C3   | c.193A>C p.(Lys65Gln)                   | Pathogenic                                                | [55]                                       | 0.0048        | No                         | F                 | 18  | U               | yes |      |
| 388              | C3   | c.193A>C p.(Lys65Gln)                   | Pathogenic                                                | [55]                                       | 0.0048        | No                         | F                 | 20  | Y               | no  |      |
| 389              | C3   | c.3325C>G p.(Leu1109Val)<br>homozygous  | Pathogenic <sup>β</sup>                                   | -                                          |               | No                         | F                 | 2   | Y               | no  |      |
| 390              | C3   | c.3124C>G p.(Arg1042Gly)                | Pathogenic                                                | [56]                                       | NA            | No                         | F                 | 1   | N               | no  |      |
| 391              | CFB  | c.967A>C p.(Lys323Gln)                  | Pathogenic                                                | [69]                                       | NA            | No                         | F                 | 1   | N               | no  |      |
| 29               | DGKE | c.1597A>C p.(Thr533Pro)<br>homozygous   | <i>In silico</i> analysis                                 | -                                          | 0.0012        | Yes                        | M                 | 1   | U               | yes |      |
| 31               | DGKE | c.325A>G p.(Lys109Glu)<br>homozygous    | <i>In silico</i> analysis                                 | [62]                                       | NA            | No                         | F                 | 1   | U               | no  |      |
| 32               | DGKE | c.236A>C p.(Gln79Pro)<br>homozygous     | <i>In silico</i> analysis                                 | -                                          | NA            | No                         | F                 | 1   | U               | no  |      |
| 35               | DGKE | c.325A>G p.(Lys109Glu)<br>homozygous    | <i>In silico</i> analysis                                 | [62]                                       | NA            | No                         | F                 | 1   | U               | no  |      |
| 36               | DGKE | c.966G>A p.(Trp322*) and<br>c.1524+2T>C | <i>In silico</i> analysis and<br>RNA studies <sup>β</sup> | [61, 62]                                   | 0.0099 and NA | No                         | M                 | 1   | Y               | no  |      |
| 40               | DGKE | c.966G>A p.(Trp322*)<br>homozygous      | <i>In silico</i> analysis                                 | [62]                                       | 0.0099        | No                         | F                 | 1   | N               | no  |      |
| FHAA             |      | Copy number                             |                                                           | FHAA titre at<br>presentation <sup>α</sup> | Refs          | #Population<br>frequency % | Family<br>history | Sex | Age at<br>onset | PEX | ESRD |
|                  |      | CFHR1                                   | CFHR3                                                     |                                            |               |                            |                   |     |                 |     |      |
| 14               | FHAA | 0                                       | 0                                                         | 772                                        | -             | -                          | No                | M   | 1               | N   | no   |
| 15               | FHAA | 0                                       | 0                                                         | 4000                                       | -             | -                          | No                | M   | 3               | N   | no   |
| 20               | FHAA | 0                                       | 1                                                         | 1594                                       | -             | -                          | No                | F   | 6               | N   | no   |
| 392              | FHAA | 0                                       | 0                                                         | >4000                                      | -             | -                          | No                | M   | 5               | N   | no   |
| 393              | FHAA | 0                                       | 1                                                         | 5120                                       | -             | -                          | No                | F   | 7               | N   | no   |
| 394              | FHAA | 1                                       | 1                                                         | 9239                                       | -             | -                          | No                | M   | 13              | N   | no   |
| 395              | FHAA | 0                                       | 0                                                         | 1507                                       | -             | -                          | No                | M   | 8               | Y   | no   |
| 24               | FHAA | 0                                       | 0                                                         | 3396                                       | -             | -                          | No                | M   | 9               | N   | no   |
| 396              | FHAA | 0                                       | 0                                                         | 7507                                       | -             | -                          | No                | M   | 69              | N   | no   |
| 397              | FHAA | 0                                       | 1                                                         | 2+                                         | -             | -                          | No                | F   | 6               | N   | no   |
| 398              | FHAA | 0                                       | 0                                                         | 1450                                       | -             | -                          | No                | F   | 54              | Y   | no   |
| Co<br>m          | 399  | CFH                                     | c.694C>T p.(Arg232*)                                      | Type 1                                     | -             | 0.0008                     | No                | F   | 25              | N   | no   |
|                  |      | C3                                      | c.193A>C p.(Lys65Gln)                                     | Pathogenic                                 | [55]          | 0.0048                     |                   |     |                 |     |      |

|                  |             |                            |          |                   |      |               |     |   |    |   |     |
|------------------|-------------|----------------------------|----------|-------------------|------|---------------|-----|---|----|---|-----|
| 400              | <i>CFI</i>  | c.355G>A p.(Gly119Arg)     |          | Type 1            | [41] | 0.042         | No  | F | 28 | N | yes |
|                  | <i>FHAA</i> | CFHR1: 2                   | CFHR3: 2 | Titre 257         | -    | -             |     |   |    |   |     |
| 16               | <i>CFI</i>  | c.859G>A p.(Gly287Arg)     |          | Type 1            | [8]  | 0.0046        | No  | F | 8  | Y | no  |
|                  | <i>FHAA</i> | CFHR1: 0                   | CFHR3: 0 | Titre 4000        | -    | -             |     |   |    |   |     |
| 401 <sup>s</sup> | <i>CD46</i> | c.286+2T>G and c.1127+2T>G |          | Pathogenic Type 1 | [46] | 0.0052 and NA | No  | F | 18 | N | no  |
|                  | <i>FHAA</i> | CFHR1: 1                   | CFHR3: 1 | Titre 257         | -    | -             |     |   |    |   |     |
| 402              | <i>CD46</i> | c.133dupG p.(Glu45fs)      |          | Pathogenic Type 1 | -    | NA            | Yes | F | 2  | U | no  |
|                  | <i>CFH</i>  | CFH:CFHR1 hybrid           |          | FH hybrid         | -    | NA            |     |   |    |   |     |
| 403              | <i>CFH</i>  | c.1825G>A p.(Val609Ile)    |          | VUS               | -    | 0.028         | No  | M | 1  | N | no  |
| 404              | <i>CFH</i>  | c.211T>C p.(Trp71Arg)      |          | VUS               | -    | NA            | No  | F | 23 | Y | no  |
| 405              | <i>CFH</i>  | c.2850G>T p.(Gln950His)    |          | VUS               | -    | 0.39          | No  | M | 3  | N | no  |
| 406              | <i>CFH</i>  | c.3134-5T>C                |          | VUS               | -    | 4.36          | No  | F | 28 | U | no  |
| 407              | <i>CFH</i>  | c.3264A>C p.(Glu1088Asp)   |          | VUS               | -    | 0.0004        | No  | M | 51 | Y | yes |
| 408              | <i>CFH</i>  | c.3568T>C, p.(Tyr1190His)  |          | VUS               | -    | NA            | No  | F | 1  | Y | no  |
| 409              | <i>CFH</i>  | c.2500A>C p.(Lys834Gln)    |          | VUS               | -    | NA            | No  | F | 1  | N | no  |
| 410              | <i>CFH</i>  | c.1954A>T p.(Ser652Cys)    |          | VUS               | -    | NA            | No  | M | 19 | Y | no  |
| 411              | <i>CFI</i>  | c.1534+5G>T                |          | VUS               | -    | 0.87          | No  | F | 48 | Y | no  |
| 412              | <i>CFI</i>  | c.1534+5G>T                |          | VUS               | -    | 0.87          | No  | F | 73 | Y | yes |
| 413              | <i>CFI</i>  | c.1534+5G>T                |          | VUS               | -    | 0.87          | No  | F | 69 | Y | no  |
| 414              | <i>CD46</i> | c.472G>C p.(Glu158Gln)     |          | VUS               | -    | 0.0004        | No  | M | 47 | Y | yes |
| 415              | <i>CD46</i> | c.1058C>T p.(Ala353Val)    |          | VUS               | -    | 1.54          | No  | F | 69 | Y | yes |
| 416              | <i>CD46</i> | c.417A>G p.(Leu139=)       |          | VUS               | -    | 0.67          | No  | F | 66 | Y | no  |
| 417              | <i>CD46</i> | c.1027+5G>T                |          | VUS               | -    | NA            | No  | M | 2  | N | no  |
| 418              | <i>CD46</i> | c.1148C>T p.(Thr383Ile)    |          | VUS               | -    | 0.074         | No  | M | 42 | Y | yes |
| 419              | <i>CFB</i>  | c.1112A>G p.(Asp371Gly)    |          | VUS               | -    | NA            | No  | F | 24 | Y | no  |
| 420              | <i>CFB</i>  | c.1697A>C p.(Glu566Ala)    |          | VUS               | -    | 1.07          | No  | F | 10 | U | no  |
| 421              | <i>C3</i>   | c.3023C>T p.(Ser1008Leu)   |          | VUS               | -    | 0.0036        | No  | F | 3  | N | no  |
| 422              | <i>C3</i>   | c.3466G>A p.(Asp1156Asn)   |          | VUS               | -    | NA            | No  | F | 3  | Y | no  |
| 423              | <i>C3</i>   | c.493G>T p.(Val165Phe)     |          | VUS               | -    | NA            | No  | M | 34 | Y | no  |
| 424              | <i>C3</i>   | c.4411C>T p.(Leu1471Phe)   |          | VUS               | -    | NA            | No  | M | 6  | N | no  |
| 425              | <i>C3</i>   | c.1618G>T p.(Ala540Ser)    |          | VUS               | -    | 0.0048        | No  | F | 4  | N | no  |
| 426              | <i>C3</i>   | c.1855G>A p.(Val619Met)    |          | VUS               | -    | 0.031         | No  | F | 22 | N | no  |
| 427              | nmd         |                            |          |                   |      |               | No  | M |    | U |     |
| 428              | nmd         |                            |          |                   |      |               | No  | M | 1  | N | no  |
| 429              | nmd         |                            |          |                   |      |               | No  | M | 26 | Y | yes |
| 430              | nmd         |                            |          |                   |      |               | No  | F | 1  | N | no  |
| 431              | nmd         |                            |          |                   |      |               | No  | M | 63 | N | yes |
| 432              | nmd         |                            |          |                   |      |               | No  | F | 77 | Y | no  |

|     |     |  |  |  |  |    |   |    |   |     |
|-----|-----|--|--|--|--|----|---|----|---|-----|
| 433 | nmd |  |  |  |  | No | F | 53 | Y | yes |
| 434 | nmd |  |  |  |  | No | F | 37 | N | no  |
| 435 | nmd |  |  |  |  | No | F | 24 | Y | no  |
| 436 | nmd |  |  |  |  | No | M | 39 | Y | no  |
| 437 | nmd |  |  |  |  | No | M | 53 | Y | no  |
| 438 | nmd |  |  |  |  | No | M | 1  | N | no  |
| 439 | nmd |  |  |  |  | No | F | 26 | Y | no  |
| 440 | nmd |  |  |  |  | No | M | 40 | Y | no  |
| 441 | nmd |  |  |  |  | No | F | 2  | Y | no  |
| 442 | nmd |  |  |  |  | No | F | 1  | N | no  |
| 443 | nmd |  |  |  |  | No | F | 65 | Y | no  |
| 444 | nmd |  |  |  |  | No | F | 41 | N | no  |
| 445 | nmd |  |  |  |  | No | F | 30 | Y | yes |
| 446 | nmd |  |  |  |  | No | M | 19 | Y | yes |
| 447 | nmd |  |  |  |  | No | M | 5  | Y | no  |
| 448 | nmd |  |  |  |  | No | M | 1  | N | no  |
| 449 | nmd |  |  |  |  | No | F | 2  | N | no  |
| 450 | nmd |  |  |  |  | No | F | 19 | U | no  |
| 451 | nmd |  |  |  |  | No | M | 6  | N | no  |
| 452 | nmd |  |  |  |  | No | F | 51 | Y | yes |
| 453 | nmd |  |  |  |  | No | M | 63 | Y | no  |
| 454 | nmd |  |  |  |  | No | F | 64 | N | no  |
| 455 | nmd |  |  |  |  | No | M | 50 | N | yes |
| 456 | nmd |  |  |  |  | No | F | 70 | Y | no  |
| 457 | nmd |  |  |  |  | No | F | 26 | N | no  |
| 458 | nmd |  |  |  |  | No | F | 20 | Y | no  |
| 459 | nmd |  |  |  |  | No | M | 16 | Y | no  |
| 460 | nmd |  |  |  |  | No | F | 29 | N | no  |
| 461 | nmd |  |  |  |  | No | F | 33 | Y | no  |
| 462 | nmd |  |  |  |  | No | F | 32 | Y | no  |
| 463 | nmd |  |  |  |  | No | F | 29 | Y | no  |
| 464 | nmd |  |  |  |  | No | F | 56 | Y | no  |
| 465 | nmd |  |  |  |  | No | M | 43 | Y | yes |
| 466 | nmd |  |  |  |  | No | M | 59 | Y | yes |
| 467 | nmd |  |  |  |  | No | M | 33 | Y | no  |
| 468 | nmd |  |  |  |  | No | F | 34 | Y | no  |
| 469 | nmd |  |  |  |  | No | F | 29 | Y | no  |
| 470 | nmd |  |  |  |  | No | M | 62 | Y | yes |
| 471 | nmd |  |  |  |  | No | F | 27 | Y | yes |

| 472            | nmd     |                                                         |  |  |       | No             | F   | 35           | Y   | no   |
|----------------|---------|---------------------------------------------------------|--|--|-------|----------------|-----|--------------|-----|------|
| 473            | nmd     |                                                         |  |  |       | No             | F   | 70           | Y   | no   |
| 474            | nmd     |                                                         |  |  |       | No             | M   | 31           | Y   | no   |
| 475            | nmd     |                                                         |  |  |       | No             | F   | 72           | Y   | yes  |
| 476            | nmd     |                                                         |  |  |       | No             | F   | 1            | N   | no   |
| 477            | nmd     |                                                         |  |  |       | No             | M   | 61           | Y   | no   |
| 478            | nmd     |                                                         |  |  |       | No             | M   | 80           | Y   | no   |
| 479            | nmd     |                                                         |  |  |       | No             | F   | 29           | N   | yes  |
| 480            | nmd     |                                                         |  |  |       | No             | F   | 28           | Y   | no   |
| 481            | nmd     |                                                         |  |  |       | No             | M   | 45           | N   | yes  |
| 482            | nmd     |                                                         |  |  |       | No             | F   | 65           | Y   | no   |
| 483            | nmd     |                                                         |  |  |       | No             | M   | 48           | Y   | no   |
| 484            | nmd     |                                                         |  |  |       | No             | M   | 23           | Y   | no   |
| 485            | nmd     |                                                         |  |  |       | No             | F   | 18           | Y   | no   |
| 485            | nmd     |                                                         |  |  |       | No             | F   | 23           | Y   | no   |
| 487            | nmd     |                                                         |  |  |       | No             | M   | 54           | N   | no   |
| 488            | nmd     |                                                         |  |  |       | No             | F   | 62           | Y   | no   |
| 489            | nmd     |                                                         |  |  |       | No             | M   | 47           | Y   | yes  |
| 490            | nmd     |                                                         |  |  |       | No             | M   | 34           | Y   | yes  |
| 491            | nmd     |                                                         |  |  |       | No             | M   | 1            | Y   | no   |
| 492            | nmd     |                                                         |  |  |       | No             | M   | 67           | N   | yes  |
| 493            | nmd     |                                                         |  |  |       | No             | F   | 33           | Y   | no   |
| 494            | nmd     |                                                         |  |  |       | No             | F   | 30           | U   | yes  |
| 495            | nmd     |                                                         |  |  |       | No             | F   | 1            | N   | no   |
| 496            | nmd     |                                                         |  |  |       | No             | F   | 2            | N   | yes  |
| 497            | nmd     |                                                         |  |  |       | No             | F   | 30           | Y   | no   |
| 498            | nmd     |                                                         |  |  |       | No             | M   | 29           | N   | yes  |
| 499            | nmd     |                                                         |  |  |       | No             | F   | 68           | N   |      |
| 500            | nmd     |                                                         |  |  |       | No             | F   | 2            | N   | no   |
| 501            | nmd     |                                                         |  |  |       | No             | F   | 55           | Y   | no   |
| 502            | nmd     |                                                         |  |  |       | No             | M   | 40           | N   | no   |
| 503            | nmd     |                                                         |  |  |       | No             | F   | 2            | U   | no   |
| 504            | nmd     |                                                         |  |  |       | No             | M   | 1            | N   | no   |
| Patient Number | C' Gene | Ultimate diagnosis                                      |  |  | Gene  | Family history | Sex | Age at onset | PEX | ESRD |
| 505            | nmd     | Renal biopsy showed severe chronic damage, no TMA       |  |  |       | No             | M   | 13           | N   | yes  |
| 506            | nmd     | Post-partum haemorrhage                                 |  |  |       | No             | F   | 29           | N   |      |
| 507            | nmd     | Renal biopsy consistent with chronic glomerulonephritis |  |  |       | No             | M   | 34           | Y   | yes  |
| 508            | nmd     | FSGS                                                    |  |  | ACTN4 | No             | F   | 17           | N   | yes  |

|     |     |                                                |               |    |   |    |     |     |
|-----|-----|------------------------------------------------|---------------|----|---|----|-----|-----|
| 509 | nmd | Fungal septicaemia and DIC                     |               | No | F | 37 | Y   | no  |
| 510 | nmd | 4H leukodystrophy                              | <i>POLR3B</i> | No | M | 1  | Y   | no  |
| 511 | nmd | STEC-HUS                                       |               | No | F | 1  | N   | no  |
| 512 | nmd | STEC-HUS                                       |               | No | M | 10 | Y   | no  |
| 513 | nmd | STEC-HUS                                       |               | No | M | 46 | Y   | no  |
| 514 | nmd | Scleroderma                                    |               | No | F | 73 | Y   |     |
| 515 | nmd | STEC-HUS                                       |               | No | F | 76 | Y   |     |
| 516 | nmd | Scleroderma                                    |               | No | F | 37 | Y   | yes |
| 517 | nmd | Severe pancreatitis and multi-organ failure    |               | No | F | 15 | Y   | yes |
| 518 | nmd | Pneumococcal HUS                               |               | No | F | 2  | U   | no  |
| 519 | nmd | Nail patella syndrome                          | <i>LMX1B</i>  | No | M | 1  | FFP | no  |
| 520 | nmd | G6PD deficiency                                | <i>G6PD</i>   | No | M | 3  | Y   | no  |
| 521 | nmd | Drug mediated TMA                              |               | No | M | 38 | N   | no  |
| 522 | nmd | Scleroderma                                    |               | No | M | 45 | N   | yes |
| 523 | nmd | Renal biopsy showed ATN                        |               | No | F | 54 | Y   | no  |
| 524 | nmd | Post-partum haemorrhage                        |               | No | F | 42 | Y   | no  |
| 525 | nmd | Disorder of cobalamin metabolism TMA           | <i>MMACHC</i> | No | M | 5  | N   | no  |
| 526 | nmd | Other genetic TMA                              | <i>EXOSC3</i> | No | F | 1  | N   | no  |
| 527 | nmd | Other genetic TMA                              | <i>EXOSC3</i> | No | M | 1  | N   | no  |
| 528 | nmd | Disorder of cobalamin metabolism TMA           | <i>MTR</i>    | No | M | 2  | N   | no  |
| 529 | nmd | STEC-HUS                                       |               | No | F | 11 | N   | no  |
| 530 | nmd | Paroxysmal nocturnal haemoglobinuria           |               | No | F | 32 | N   | no  |
| 531 | nmd | STEC-HUS                                       |               | No | F | 68 | N   | no  |
| 532 | nmd | Lupus with autoimmune haemolysis               |               | No | F | 19 | N   |     |
| 533 | nmd | Primary hyperoxaluria                          | <i>AGXT</i>   | No | M | 1  | N   | yes |
| 534 | nmd | IgA nephropathy on biopsy                      |               | No | M | 27 | Y   | yes |
| 535 | nmd | Sepsis                                         |               | No | F | 1  | N   | no  |
| 536 | nmd | STEC-HUS                                       |               | No | M | 1  | N   | no  |
| 537 | nmd | STEC-HUS                                       |               | No | M | 15 | Y   | no  |
| 538 | nmd | STEC-HUS                                       |               | No | M | 17 | Y   | no  |
| 539 | nmd | STEC-HUS                                       |               | No | F | 11 | N   | yes |
| 540 | nmd | STEC-HUS                                       |               | No | M | 62 | N   | no  |
| 541 | nmd | Drug mediated TMA                              |               | No | M | 36 | Y   | no  |
| 542 | nmd | Sepsis                                         |               | No | F | 44 | Y   | no  |
| 543 | nmd | Primary FSGS                                   | <i>NPHS2</i>  | No | F | 29 | Y   | no  |
| 544 | nmd | No TMA on renal biopsy                         |               | No | M | 62 | Y   | no  |
| 545 | nmd | Malignant hypertension (renal artery stenosis) |               | No | F | 1  | N   | no  |
| 546 | nmd | Died before definitive diagnosis made          |               | No | F | 1  | N   | no  |
| 547 | nmd | Dihydrofolate reductase deficiency             | <i>DHFR</i>   | No | M | 1  | N   | no  |

|     |     |                                   |                |     |   |    |   |     |
|-----|-----|-----------------------------------|----------------|-----|---|----|---|-----|
| 548 | nmd | Other genetic TMA                 | <i>INF2</i>    | Yes | F | 15 | Y | yes |
| 549 | nmd | Apparent mineralocorticoid excess | <i>HSD11B2</i> | No  | M | 8  | N | no  |

Abbreviations: DIC, disseminated intravascular coagulation; ESRD, end stage renal disease; FFP, fresh frozen plasma; FSGS, focal segmental glomerulosclerosis; G6PD, glucose-6-phosphate dehydrogenase; HUS, haemolytic uraemic syndrome; N, no; NA, not available; nmd, no mutation detected; PEX, plasma exchange; Refs, references – evidence of pathogenicity; STEC-HUS, shiga toxin-producing *E. coli* haemolytic uraemic syndrome; TMA, thrombotic microangiopathy; U, unknown; Y, yes.

\*Pathogenicity: Type 1 mutations result in low serum levels.

<sup>¶</sup>Where the consensus assay was performed a titre is given; if the test preceded the availability of the consensus assay then the titre was not quantifiable.

<sup>§</sup>These individuals in the treated cohort did not receive eculizumab at their first presentation and so were handled differently in the survival analysis

<sup>#</sup>Population frequency refers to that reported for each variant in the gnomAD database (all), other than: \* refers to the EXaC database, <sup>§</sup> refers to the PAGE\_STUDY, and <sup>α</sup> refers to TOPMED; NA = population frequency not available.

<sup>β</sup>In-house functional or RNA studies

<sup>¶</sup>This individual received ravulizumab in the ALXN1210 clinical trial

For the individuals shaded in yellow there is no survival data available

## References

1. Kaplan, B.S., et al., *Renal transplantation in adults with autosomal recessive inheritance of hemolytic uremic syndrome*. Am J Kidney Dis, 1997. **30**(6): p. 760-5.
2. Wilson, V., et al., *Genotype/phenotype correlations in complement factor H deficiency arising from uniparental isodisomy*. Am J Kidney Dis, 2013. **62**(5): p. 978-83.
3. Saland, J.M., et al., *Favorable long-term outcome after liver-kidney transplant for recurrent hemolytic uremic syndrome associated with a factor H mutation*. Am J Transplant, 2006. **6**(8): p. 1948-52.
4. Sanchez-Corral, P., et al., *Structural and functional characterization of factor H mutations associated with atypical hemolytic uremic syndrome*. Am J Hum Genet, 2002. **71**(6): p. 1285-95.
5. Herbert, A.P., et al., *Structural and functional characterization of the product of disease-related factor H gene conversion*. Biochemistry, 2012. **51**(9): p. 1874-84.
6. Kim, J.J., et al., *Plasma therapy for atypical haemolytic uraemic syndrome associated with heterozygous factor H mutations*. Pediatr Nephrol, 2011. **26**(11): p. 2073-6.
7. Bruel, A., et al., *Hemolytic Uremic Syndrome in Pregnancy and Postpartum*. Clin J Am Soc Nephrol, 2017. **12**(8): p. 1237-1247.
8. Maga, T.K., et al., *Mutations in alternative pathway complement proteins in American patients with atypical hemolytic uremic syndrome*. Hum Mutat, 2010. **31**(6): p. E1445-60.
9. Wilson, C., et al., *Successful simultaneous liver-kidney transplant in an adult with atypical hemolytic uremic syndrome associated with a mutation in complement factor H*. Am J Kidney Dis, 2011. **58**(1): p. 109-12.
10. Kavanagh, D., T.H. Goodship, and A. Richards, *Atypical hemolytic uremic syndrome*. Semin Nephrol, 2013. **33**(6): p. 508-30.
11. Heinen, S., et al., *De novo gene conversion in the RCA gene cluster (1q32) causes mutations in complement factor H associated with atypical hemolytic uremic syndrome*. Hum Mutat, 2006. **27**(3): p. 292-3.
12. Massart, A., et al., *Complement factor H functional assay may help to monitor atypical haemolytic uraemic syndrome: a pilot study*. Acta Clin Belg, 2013. **68**(1): p. 9-14.
13. Westra, D., et al., *Genetic disorders in complement (regulating) genes in patients with atypical haemolytic uraemic syndrome (aHUS)*. Nephrol Dial Transplant, 2010. **25**(7): p. 2195-202.
14. Szarvas, N., et al., *Genetic analysis and functional characterization of novel mutations in a series of patients with atypical hemolytic uremic syndrome*. Mol Immunol, 2016. **71**: p. 10-22.
15. Phillips, E.H., et al., *The role of ADAMTS-13 activity and complement mutational analysis in differentiating acute thrombotic microangiopathies*. J Thromb Haemost, 2016. **14**(1): p. 175-85.
16. Manuelian, T., et al., *Mutations in factor H reduce binding affinity to C3b and heparin and surface attachment to endothelial cells in hemolytic uremic syndrome*. J Clin Invest, 2003. **111**(8): p. 1181-90.
17. Haller, W., et al., *Successful isolated liver transplantation in a child with atypical hemolytic uremic syndrome and a mutation in complement factor H*. Am J Transplant, 2010. **10**(9): p. 2142-7.
18. Servais, A., et al., *Acquired and genetic complement abnormalities play a critical role in dense deposit disease and other C3 glomerulopathies*. Kidney Int, 2012. **82**(4): p. 454-64.
19. Nester, C.M., et al., *Atypical aHUS: State of the art*. Mol Immunol, 2015. **67**(1): p. 31-42.
20. Warwicker, P., et al., *Familial relapsing haemolytic uraemic syndrome and complement factor H deficiency*. Nephrol Dial Transplant, 1999. **14**(5): p. 1229-33.
21. Filler, G., et al., *Challenges in the management of infantile factor H associated hemolytic uremic syndrome*. Pediatr Nephrol, 2004. **19**(8): p. 908-11.

22. Edey, M.M., et al., *Association of a factor H mutation with hemolytic uremic syndrome following a diarrheal illness*. Am J Kidney Dis, 2008. **51**(3): p. 487-90.
23. Cullinan, N., et al., *Case report: Benefits and challenges of long-term eculizumab in atypical hemolytic uremic syndrome*. Pediatrics, 2015. **135**(6): p. e1506-9.
24. Francis, N.J., et al., *A novel hybrid CFH/CFHR3 gene generated by a microhomology-mediated deletion in familial atypical hemolytic uremic syndrome*. Blood, 2012. **119**(2): p. 591-601.
25. Downen, F., et al., *Rare genetic variants in Shiga toxin-associated haemolytic uraemic syndrome: genetic analysis prior to transplantation is essential*. Clin Kidney J, 2017. **10**(4): p. 490-493.
26. Lapeyraque, A.L., et al., *Efficacy of plasma therapy in atypical hemolytic uremic syndrome with complement factor H mutations*. Pediatr Nephrol, 2008. **23**(8): p. 1363-6.
27. Davin, J.C., et al., *Prevention of large-vessel stenoses in atypical hemolytic uremic syndrome associated with complement dysregulation*. Pediatr Nephrol, 2011. **26**(1): p. 155-7.
28. Davin, J.C., L. Strain, and T.H. Goodship, *Plasma therapy in atypical haemolytic uremic syndrome: lessons from a family with a factor H mutation*. Pediatr Nephrol, 2008. **23**(9): p. 1517-21.
29. Olie, K.H., et al., *Atypical relapse of hemolytic uremic syndrome after transplantation*. Pediatr Nephrol, 2004. **19**(10): p. 1173-6.
30. Olie, K.H., et al., *Posttransplantation cytomegalovirus-induced recurrence of atypical hemolytic uremic syndrome associated with a factor H mutation: successful treatment with intensive plasma exchanges and ganciclovir*. Am J Kidney Dis, 2005. **45**(1): p. e12-5.
31. Davin, J.C., et al., *Complement factor H-associated atypical hemolytic uremic syndrome in monozygotic twins: concordant presentation, discordant response to treatment*. Am J Kidney Dis, 2006. **47**(2): p. e27-30.
32. Sansbury, F.H., et al., *Factors determining penetrance in familial atypical haemolytic uraemic syndrome*. J Med Genet, 2014. **51**(11): p. 756-64.
33. Edelsten, A.D. and S. Tuck, *Familial haemolytic uraemic syndrome*. Arch Dis Child, 1978. **53**(3): p. 255-6.
34. Warwicker, P., et al., *Genetic studies into inherited and sporadic hemolytic uremic syndrome*. Kidney Int, 1998. **53**(4): p. 836-44.
35. Venables, J.P., et al., *Atypical haemolytic uraemic syndrome associated with a hybrid complement gene*. PLoS Med, 2006. **3**(10): p. e431.
36. Farr, M.J., et al., *The haemolytic uraemic syndrome--a family study*. Q J Med, 1975. **44**(174): p. 161-88.
37. Caprioli, J., et al., *The molecular basis of familial hemolytic uremic syndrome: mutation analysis of factor H gene reveals a hot spot in short consensus repeat 20*. J Am Soc Nephrol, 2001. **12**(2): p. 297-307.
38. Buddles, M.R., et al., *Complement factor H gene mutation associated with autosomal recessive atypical hemolytic uremic syndrome*. Am J Hum Genet, 2000. **66**(5): p. 1721-2.
39. Valoti, E., et al., *A novel atypical hemolytic uremic syndrome-associated hybrid CFHR1/CFH gene encoding a fusion protein that antagonizes factor H-dependent complement regulation*. J Am Soc Nephrol, 2015. **26**(1): p. 209-19.
40. Kavanagh, D., et al., *Mutations in complement factor I predispose to development of atypical hemolytic uremic syndrome*. J Am Soc Nephrol, 2005. **16**(7): p. 2150-5.
41. van de Ven, J.P., et al., *A functional variant in the CFI gene confers a high risk of age-related macular degeneration*. Nat Genet, 2013. **45**(7): p. 813-7.
42. Nilsson, S.C., et al., *Mutations in complement factor I as found in atypical hemolytic uremic syndrome lead to either altered secretion or altered function of factor I*. Eur J Immunol, 2010. **40**(1): p. 172-85.
43. Bienaime, F., et al., *Mutations in components of complement influence the outcome of Factor I-associated atypical hemolytic uremic syndrome*. Kidney Int, 2010. **77**(4): p. 339-49.
44. Sellier-Leclerc, A.L., et al., *Differential impact of complement mutations on clinical characteristics in atypical hemolytic uremic syndrome*. J Am Soc Nephrol, 2007. **18**(8): p. 2392-400.



45. Kavanagh, D., et al., *Characterization of mutations in complement factor I (CFI) associated with hemolytic uremic syndrome*. Mol Immunol, 2008. **45**(1): p. 95-105.
46. Fremeaux-Bacchi, V., et al., *Genetic and functional analyses of membrane cofactor protein (CD46) mutations in atypical hemolytic uremic syndrome*. J Am Soc Nephrol, 2006. **17**(7): p. 2017-25.
47. Caprioli, J., et al., *Genetics of HUS: the impact of MCP, CFH, and IF mutations on clinical presentation, response to treatment, and outcome*. Blood, 2006. **108**(4): p. 1267-79.
48. Kwon, T., et al., *Varicella as a trigger of atypical haemolytic uraemic syndrome associated with complement dysfunction: two cases*. Nephrol Dial Transplant, 2009. **24**(9): p. 2752-4.
49. Reid, V.L., A. Mullan, and L.P. Erwig, *Rapid recovery of membrane cofactor protein (MCP; CD46) associated atypical haemolytic uraemic syndrome with plasma exchange*. BMJ Case Rep, 2013. **2013**.
50. Richards, A., et al., *Mutations in human complement regulator, membrane cofactor protein (CD46), predispose to development of familial hemolytic uremic syndrome*. Proc Natl Acad Sci U S A, 2003. **100**(22): p. 12966-71.
51. Pirson, Y., et al., *Hemolytic uremic syndrome in three adult siblings: a familial study and evolution*. Clin Nephrol, 1987. **28**(5): p. 250-5.
52. Bento, D., et al., *Triggering of atypical hemolytic uremic syndrome by influenza A (H1N1)*. Ren Fail, 2010. **32**(6): p. 753-6.
53. Bogdanovic, R., et al., *Recurrent haemolytic-uraemic syndrome with hypocomplementaemia: a case report*. Pediatr Nephrol, 1988. **2**(2): p. 236-8.
54. Fremeaux-Bacchi, V., et al., *Mutations in complement C3 predispose to development of atypical hemolytic uremic syndrome*. Blood, 2008. **112**(13): p. 4948-52.
55. Volokhina, E., et al., *Novel C3 mutation p.Lys65Gln in aHUS affects complement factor H binding*. Pediatr Nephrol, 2012. **27**(9): p. 1519-24.
56. Schramm, E.C., et al., *Mapping interactions between complement C3 and regulators using mutations in atypical hemolytic uremic syndrome*. Blood, 2015. **125**(15): p. 2359-69.
57. Smith-Jackson, K., et al., *Hyperfunctional complement C3 promotes C5-dependent atypical hemolytic uremic syndrome in mice*. J Clin Invest, 2019. **129**(3): p. 1061-1075.
58. Seddon, J.M., et al., *Rare variants in CFI, C3 and C9 are associated with high risk of advanced age-related macular degeneration*. Nat Genet, 2013. **45**(11): p. 1366-70.
59. Roumenina, L.T., et al., *A prevalent C3 mutation in aHUS patients causes a direct C3 convertase gain of function*. Blood, 2012. **119**(18): p. 4182-91.
60. Lhotta, K., et al., *A large family with a gain-of-function mutation of complement C3 predisposing to atypical hemolytic uremic syndrome, microhematuria, hypertension and chronic renal failure*. Clin J Am Soc Nephrol, 2009. **4**(8): p. 1356-62.
61. Brocklebank, V., et al., *Long-term outcomes and response to treatment in DGKE nephropathy*. Kidney International, 2020. **97**(6): p. 1260-1274.
62. Azukaitis, K., et al., *The Phenotypic Spectrum of Nephropathies Associated with Mutations in Diacylglycerol Kinase epsilon*. J Am Soc Nephrol, 2017. **28**(10): p. 3066-3075.
63. Brocklebank, V., et al., *Factor H autoantibody is associated with atypical hemolytic uremic syndrome in children in the United Kingdom and Ireland*. Kidney Int, 2017. **92**(5): p. 1261-1271.
64. Yu, Y., et al., *Whole-exome sequencing identifies rare, functional CFH variants in families with macular degeneration*. Hum Mol Genet, 2014. **23**(19): p. 5283-93.
65. Pechtl, I.C., et al., *Disease-associated N-terminal complement factor H mutations perturb cofactor and decay-accelerating activities*. J Biol Chem, 2011. **286**(13): p. 11082-90.
66. Legendre, C.M., et al., *Terminal complement inhibitor eculizumab in atypical hemolytic-uremic syndrome*. N Engl J Med, 2013. **368**(23): p. 2169-81.
67. Neave, L., et al., *Atypical haemolytic uraemic syndrome in the eculizumab era: presentation, response to treatment and evaluation of an eculizumab withdrawal strategy*. Br J Haematol, 2019. **186**(1): p. 113-124.

68. Martinez-Barricarte, R., et al., *The molecular and structural bases for the association of complement C3 mutations with atypical hemolytic uremic syndrome*. Mol Immunol, 2015. **66**(2): p. 263-73.
69. Marinozzi, M.C., et al., *Complement factor B mutations in atypical hemolytic uremic syndrome-disease-relevant or benign?* J Am Soc Nephrol, 2014. **25**(9): p. 2053-65.
70. Gilbert, R.D., et al., *Eculizumab therapy for atypical haemolytic uraemic syndrome due to a gain-of-function mutation of complement factor B*. Pediatr Nephrol, 2013. **28**(8): p. 1315-8.
71. Gilbert, R.D., et al., *Cisplatin-induced haemolytic uraemic syndrome associated with a novel intronic mutation of CD46 treated with eculizumab*. Clin Kidney J, 2013. **6**(4): p. 421-425.
72. Hu, H., et al., *Eculizumab in atypical haemolytic uraemic syndrome with severe cardiac and neurological involvement*. Pediatr Nephrol, 2014. **29**(6): p. 1103-6.
73. Teoh, C.W., et al., *Clinical Relapses of Atypical HUS on Eculizumab: Clinical Gap for Monitoring and Individualised Therapy*. Case Rep Nephrol, 2018. **2018**: p. 2781789.
74. Walsh, P.R., et al., *Glucose-6-Phosphate Dehydrogenase Deficiency Mimicking Atypical Hemolytic Uremic Syndrome*. Am J Kidney Dis, 2018. **71**(2): p. 287-290.
75. Challis R.C., et al. *Thrombotic microangiopathy in inverted formin 2-mediated renal disease*. J Am Soc Nephrol, 2016. 2016. **28**(4): p. 1084-1091.

**eTable 4:** Outcome data for the eculizumab treated cohort.

| Patient number   | C' gene | At presentation | Follow up (years) | ESKD | Death* | Stopped eculizumab | Reason for stopping eculizumab |
|------------------|---------|-----------------|-------------------|------|--------|--------------------|--------------------------------|
| 318              | CFH     | Adult           | 0.0               | yes  | no     | Yes                | Non recovery of renal function |
| 319              | CFH     | Adult           | 4.6               | no   | no     | Yes                | SETS                           |
| 320              | CFH     | Adult           | 1.1               | yes  | yes    | Yes                | Non adherence                  |
| 321 <sup>s</sup> | CFH     | Child           | 13.3              | yes  | no     | No                 |                                |
| 322 <sup>s</sup> | CFH     | Child           | 12.9              | no   | no     | No                 |                                |
| 323              | CFH     | Adult           | 8.0               | yes  | no     | Yes                | Clinician decision             |
| 324              | CFH     | Adult           | 4.0               | no   | no     | No                 |                                |
| 325              | CFH     | Adult           | 4.8               | no   | no     | Yes                | Clinician decision             |
| 326 <sup>s</sup> | CFH     | Adult           | 6.9               | no   | no     | No                 |                                |
| 327              | CFH     | Adult           | 4.3               | yes  | no     | Yes                | Non recovery of renal function |
| 328              | CFH     | Child           | 7.3               | no   | no     | No                 |                                |
| 329              | CFH     | Child           | 9.3               | no   | no     | No                 |                                |
| 330              | CFH     | Adult           | 3.2               | no   | no     | Yes                | SETS                           |
| 331              | CFH     | Adult           | 3.6               | no   | no     | No                 |                                |
| 332              | CFH     | Adult           | 7.6               | no   | no     | No                 |                                |
| 333 <sup>s</sup> | CFH     | Adult           | 4.1               | yes  | no     | Yes                | Non recovery of renal function |
| 334              | CFH     | Adult           | 3.5               | no   | no     | No                 |                                |
| 335 <sup>s</sup> | CFH     | Child           | 6.9               | no   | no     | Yes                | SETS                           |
| 336              | CFH     | Adult           | 6.6               | no   | no     | No                 |                                |
| 337              | CFH     | Adult           | 5.2               | no   | no     | No                 |                                |
| 338 <sup>s</sup> | CFH     | Adult           | 14.5              | no   | no     | No                 |                                |
| 339              | CFH     | Adult           | 9.0               | no   | no     | No                 |                                |
| 340 <sup>s</sup> | CFH     | Adult           | 8.4               | no   | no     | No                 |                                |
| 341              | CFH     | Adult           | 3.1               | no   | no     | No                 |                                |
| 342              | CFH     | Adult           | 1.7               | yes  | no     | Yes                | Non recovery of renal function |
| 343 <sup>s</sup> | CFH     | Child           | 12.3              | no   | no     | No                 |                                |
| 344 <sup>n</sup> | CFH     | Adult           | 3.2               | yes  | no     | No                 |                                |
| 345              | CFH     | Child           | 2.4               | no   | no     | No                 |                                |
| 346              | CFH     | Adult           | 4.5               | no   | no     | No                 |                                |
| 347              | CFH     | Child           | 1.6               | no   | no     | No                 |                                |
| 348              | CFH     | Adult           | 2.2               | no   | no     | No                 |                                |
| 349              | CFH     | Adult           | 4.0               | no   | no     | Yes                | Clinician decision             |

|                  |           |       |      |     |     |     |                                |
|------------------|-----------|-------|------|-----|-----|-----|--------------------------------|
| 350              | CFH       | Child | 1.4  | no  | no  | No  |                                |
| 351              | CFHR1:CFH | Adult | 2.6  | no  | no  | No  |                                |
| 352              | CFI       | Adult | 0.0  | no  | yes | no  |                                |
| 353              | CFI       | Child | 5.1  | no  | no  | Yes | Family preference              |
| 354              | CFI       | Adult | 9.2  | no  | no  | No  |                                |
| 355              | CFI       | Adult | 3.3  | no  | no  | No  |                                |
| 356              | CFI       | Adult | 7.7  | no  | no  | No  |                                |
| 357              | CFI       | Adult | 1.7  | no  | no  | No  |                                |
| 358              | CD46      | Adult | 5.7  | yes | no  | Yes | After transplantation          |
| 359              | CD46      | Adult | 5.2  | no  | no  | No  |                                |
| 360              | CD46      | Adult | 4.5  | no  | no  | No  |                                |
| 361              | CD46      | Child | 5.1  | no  | no  | Yes | SETS                           |
| 362              | CD46      | Child | 4.4  | no  | no  | Yes | SETS                           |
| 363              | CD46      | Adult | 3.9  | no  | no  | Yes | SETS                           |
| 364              | CD46      | Adult | 4.0  | no  | no  | Yes | Clinician decision             |
| 365              | CD46      | Adult | 3.7  | no  | no  | No  |                                |
| 366 <sup>s</sup> | CD46      | Adult | 3.6  | no  | no  | Yes | Clinician decision             |
| 367              | CD46      | Adult | 3.5  | no  | no  | Yes | Side effects                   |
| 368              | CD46      | Adult | 3.4  | no  | no  | Yes | Clinician decision             |
| 369              | CD46      | Adult | 7.0  | no  | no  | No  |                                |
| 370 <sup>s</sup> | CD46      | Child | 34.0 | no  | no  | Yes | Clinical decision              |
| 371 <sup>s</sup> | CD46      | Child | 4.4  | no  | no  | Yes | Influenza                      |
| 372 <sup>s</sup> | CD46      | Adult | 11.9 | no  | no  | No  |                                |
| 373 <sup>s</sup> | CD46      | Child | 15.1 | no  | no  | Yes | No haematological response     |
| 374              | CD46      | Adult | 1.5  | no  | no  | No  |                                |
| 375              | CD46      | Child | 7.1  | no  | no  | Yes | Clinician decision             |
| 376 <sup>s</sup> | CD46      | Child | 2.5  | no  | no  | No  |                                |
| 377              | CD46      | Child | 5.9  | no  | no  | No  |                                |
| 378              | CD46      | Adult | 1.7  | no  | no  | No  |                                |
| 379 <sup>s</sup> | CD46      | child | 4.3  | no  | no  | Yes | Unknown                        |
| 380              | CD46      | Child | 2.8  | no  | no  | Yes | Clinician decision             |
| 381              | C3        | Adult | 6.6  | yes | no  | Yes |                                |
| 382              | C3        | Child | 4.9  | no  | no  | No  |                                |
| 383              | C3        | Adult | 7.2  | yes | no  | Yes | Non recovery of renal function |
| 384              | C3        | Child | 5.6  | no  | no  | No  |                                |
| 385              | C3        | Child | 4.9  | no  | no  | Yes | SETS                           |
| 386              | C3        | Adult | 2.4  | no  | no  | No  |                                |
| 387 <sup>s</sup> | C3        | Adult | 16.8 | yes | no  | No  |                                |

|          |          |       |       |      |     |     |                                |                                |
|----------|----------|-------|-------|------|-----|-----|--------------------------------|--------------------------------|
| 388      | C3       | Adult | 1.0   | no   | no  | No  |                                |                                |
| 389      | C3       | Child | 9.1   | no   | no  | Yes | SETS                           |                                |
| 390      | C3       | Child | 1.4   | no   | no  | No  |                                |                                |
| 391      | CFB      | Child | 8.3   | no   | no  | No  |                                |                                |
| 29       | DGKE     | Child | 26.1  | yes  | no  | Yes | DGKE                           |                                |
| 31       | DGKE     | Child | 15.3  | no   | no  | No  |                                |                                |
| 32       | DGKE     | Child | 14.3  | no   | no  | Yes | DGKE                           |                                |
| 35       | DGKE     | Child | 11.3  | no   | no  | No  |                                |                                |
| 36       | DGKE     | Child | 10.5  | no   | no  | Yes | DGKE                           |                                |
| 40       | DGKE     | Child | 2.4   | no   | no  | Yes | DGKE                           |                                |
| 14       | FHAA     | Child | 6.5   | no   | no  | No  |                                |                                |
| 15       | FHAA     | Child | 6.3   | no   | no  | Yes | SETS                           |                                |
| 20       | FHAA     | Child | 8.5   | no   | no  | No  |                                |                                |
| 392      | FHAA     | Child | 1.7   | no   | no  | Yes | SETS                           |                                |
| 393      | FHAA     | Child | 2.5   | no   | no  | No  |                                |                                |
| 394      | FHAA     | Child | 2.0   | no   | no  | Yes | SETS                           |                                |
| 395      | FHAA     | Child | 5.5   | no   | no  | No  |                                |                                |
| 24       | FHAA     | Child | 5.2   | no   | no  | Yes | SETS                           |                                |
| 396      | FHAA     | Adult | 1.5   | no   | no  | No  |                                |                                |
| 397      | FHAA     | Child | 1.2   | no   | no  | No  |                                |                                |
| 398      | FHAA     | Adult | 1.2   | no   | no  | No  |                                |                                |
| Combined | 399      | CFH   | Adult | 6.7  | no  | no  | No                             |                                |
|          |          | C3    |       |      |     |     |                                |                                |
|          | 400      | CFI   | Adult | 5.7  | yes | no  | Yes                            | Non recovery of renal function |
|          |          | FHAA  |       |      |     |     |                                |                                |
|          | 16       | CFI   | Child | 10.2 | no  | no  | No                             |                                |
|          |          | FHAA  |       |      |     |     |                                |                                |
|          | 401<br>§ | CD46  | Adult | 3.3  | no  | no  | No                             |                                |
| FHAA     |          |       |       |      |     |     |                                |                                |
| 402      | CD46     | Child | 1.0   | no   | no  | No  |                                |                                |
|          | CFH      |       |       |      |     |     |                                |                                |
| 403      | VUS      | Child | 6.3   | no   | no  | No  |                                |                                |
| 404      | VUS      | Adult | 6.1   | no   | no  | No  |                                |                                |
| 405      | VUS      | Child | 9.4   | no   | no  | No  |                                |                                |
| 406      | VUS      | Adult | 13.4  | no   | no  | Yes | Clinician decision             |                                |
| 407      | VUS      | Adult | 5.8   | yes  | no  | Yes | Non recovery of renal function |                                |
| 408      | VUS      | Child | 9.6   | no   | no  | No  |                                |                                |
| 409      | VUS      | Child | 2.6   | no   | no  | Yes | SETS                           |                                |

|     |     |       |       |     |     |         |                                |
|-----|-----|-------|-------|-----|-----|---------|--------------------------------|
| 410 | VUS | Adult | 1.8   | no  | no  | No      |                                |
| 411 | VUS | Adult | 6.5   | no  | no  | Yes     | Clinician decision             |
| 412 | VUS | Adult | 4.1   | yes | yes | Yes     | Non recovery of renal function |
| 413 | VUS | Adult | 6.4   | no  | yes | Yes     | Clinician decision             |
| 414 | VUS | Adult | 3.5   | yes | no  | No      |                                |
| 415 | VUS | Adult | 1.3   | yes | yes | Yes     | Non recovery of renal function |
| 416 | VUS | Adult | 6.7   | no  | no  | Yes     | Clinician decision             |
| 417 | VUS | Child | 8.6   | no  | no  | Yes     | Clinician decision             |
| 418 | VUS | Adult | 2.5   | yes | no  | Yes     | Moved overseas                 |
| 419 | VUS | Adult | 8.1   | no  | no  | Yes     | Clinician decision             |
| 420 | VUS | Child | 7.8   | no  | no  | Yes;    | Unknown                        |
| 421 | VUS | Child | 4.1   | no  | no  | No      |                                |
| 422 | VUS | Child | 8.5   | no  | no  | No      |                                |
| 423 | VUS | Adult | 6.2   | no  | no  | No      |                                |
| 424 | VUS | Child | 2.7   | no  | no  | No      |                                |
| 425 | VUS | Child | 3.3   | no  | no  | No      |                                |
| 426 | VUS | Adult | 2.4   | no  | no  | Yes     | Clinician decision             |
| 427 | nmd | Adult | 118.9 |     |     | Unknown |                                |
| 428 | nmd | Child | 0.0   | no  | yes | No      |                                |
| 429 | nmd | Adult | 3.6   | yes | no  | Yes     | Non recovery of renal function |
| 430 | nmd | Child | 6.6   | no  | no  | No      |                                |
| 431 | nmd | Adult | 0.8   | yes | yes | Yes     | Non recovery of renal function |
| 432 | nmd | Adult | 1.1   | no  | no  | No      |                                |
| 433 | nmd | Adult | 0.6   | yes | yes | Yes     | Non recovery of renal function |
| 434 | nmd | Adult | 1.4   | no  | no  | No      |                                |
| 435 | nmd | Adult | 1.5   | no  | no  | Yes     | Clinician decision             |
| 436 | nmd | Adult | 2.6   | no  | no  | No      |                                |
| 437 | nmd | Adult | 7.0   | no  | no  | Yes     | SETS                           |
| 438 | nmd | Child | 2.7   | no  | no  | No      |                                |
| 439 | nmd | Adult | 2.8   | no  | no  | Yes     | Clinician decision             |
| 440 | nmd | Adult | 1.1   | no  | no  | No      |                                |
| 441 | nmd | Child | 1.0   | no  | no  | Yes     | Portacath infection            |
| 442 | nmd | Child | 8.6   | no  | no  | Yes     | Patient choice                 |
| 443 | nmd | Adult | 8.4   | no  | no  | No      |                                |
| 444 | nmd | Adult | 2.0   | no  | no  | No      |                                |
| 445 | nmd | Adult | 6.2   | yes | no  | No      |                                |
| 446 | nmd | Adult | 7.1   | yes | no  | Yes     | Non recovery of renal function |
| 447 | nmd | Child | 8.2   | no  | no  | Yes     | Clinician decision             |
| 448 | nmd | Child | 6.7   | no  | no  | Yes     | Family preference              |

|                  |     |       |     |     |     |      |                                |
|------------------|-----|-------|-----|-----|-----|------|--------------------------------|
| 449              | nmd | Child | 6.6 | no  | no  | Yes  | Clinician decision             |
| 450              | nmd | Adult | 6.2 | no  | no  | Yes  | Meningococcal sepsis           |
| 451              | nmd | Child | 0.0 | no  | yes | Yes  |                                |
| 452              | nmd | Adult | 6.2 | yes | no  | Yes  | Non recovery of renal function |
| 453              | nmd | Adult | 6.0 | no  | no  | No   |                                |
| 454              | nmd | Adult | 6.0 | no  | no  | Yes  | Non recovery of renal function |
| 455              | nmd | Adult | 0.2 | yes | yes | No   |                                |
| 456              | nmd | Adult | 5.9 | no  | no  | No   |                                |
| 457              | nmd | Adult | 5.7 | no  | no  | No   |                                |
| 458              | nmd | Adult | 5.7 | no  | no  | Yes  | Patient choice                 |
| 459              | nmd | Child | 4.8 | no  | no  | Yes  | Clinician decision             |
| 460              | nmd | Adult | 4.6 | no  | no  | Yes  | No haematological response     |
| 461              | nmd | Adult | 4.5 | no  | no  | No   |                                |
| 462              | nmd | Adult | 4.4 | no  | no  | No   |                                |
| 463              | nmd | Adult | 4.3 | no  | no  | Yes  | Patient choice                 |
| 464              | nmd | Adult | 0.8 | no  | yes | No   |                                |
| 465              | nmd | Adult | 4.2 | yes | no  | Yes  | Non recovery of renal function |
| 466              | nmd | Adult | 4.2 | yes | no  | Yes  | Non recovery of renal function |
| 467              | nmd | Adult | 4.1 | no  | no  | No   |                                |
| 468              | nmd | Adult | 3.9 | no  | no  | Yes  | Clinician decision             |
| 469              | nmd | Adult | 3.6 | no  | no  | Yes; | Clinician decision             |
| 470              | nmd | Adult | 3.6 | yes | no  | Yes  | Non recovery of renal function |
| 471              | nmd | Adult | 3.5 | yes | no  | Yes  | Non recovery of renal function |
| 472              | nmd | Adult | 3.5 | no  | no  | Yes  | Clinician decision             |
| 473              | nmd | Adult | 3.4 | no  | no  | No   |                                |
| 474              | nmd | Adult | 0.8 | no  | yes | Yes  | Sepsis                         |
| 475              | nmd | Adult | 0.8 | yes | yes | Yes  | Non recovery of renal function |
| 476              | nmd | Child | 4.3 | no  | no  | No   |                                |
| 477              | nmd | Adult | 3.2 | no  | no  | Yes  | Patient choice                 |
| 478              | nmd | Adult | 0.1 | no  | yes | No   |                                |
| 479              | nmd | Adult | 1.1 | yes | yes | Yes  | Non adherence                  |
| 480              | nmd | Adult | 3.1 | no  | no  | No   |                                |
| 481              | nmd | Adult | 3.0 | yes | no  | Yes  | Non recovery of renal function |
| 482              | nmd | Adult | 3.0 | no  | no  | No   |                                |
| 483              | nmd | Adult | 4.4 | no  | no  | Yes  | Clinician decision             |
| 484 <sup>s</sup> | nmd | Adult | 2.9 | no  | no  | Yes  | SETS                           |
| 485              | nmd | Adult | 2.9 | no  | no  | Yes  | Clinician decision             |
| 485              | nmd | Adult | 2.8 | no  | no  | No   |                                |
| 487              | nmd | Adult | 2.8 | no  | no  | Yes  | Clinician decision             |

|                  |           |       |     |     |     |         |                                |
|------------------|-----------|-------|-----|-----|-----|---------|--------------------------------|
| 488              | nmd       | Adult | 2.7 | no  | no  | No      |                                |
| 489              | nmd       | Adult | 2.5 | yes | no  | Yes     | Clinician decision             |
| 490              | nmd       | Adult | 2.5 | yes | no  | Yes     | Non recovery of renal function |
| 491              | nmd       | Child | 2.5 | no  | no  | Yes     | SETS                           |
| 492              | nmd       | Adult | 0.5 | yes | yes | Yes     | Recurrent infections           |
| 493              | nmd       | Adult | 2.4 | no  | no  | No      |                                |
| 494              | nmd       | Adult | 2.1 | yes | no  | Yes     | Non recovery of renal function |
| 495              | nmd       | Child | 2.1 | no  | no  | No      |                                |
| 496              | nmd       | Child | 2.1 | yes | no  | Yes     | Non recovery of renal function |
| 497              | nmd       | Adult | 2.0 | no  | no  | Yes     | Patient choice                 |
| 498              | nmd       | Adult | 2.0 | yes | no  | Yes     | Moved overseas                 |
| 499              | nmd       | Adult | 2.0 |     |     | Unknown |                                |
| 500              | nmd       | Child | 1.5 | no  | no  | No      |                                |
| 501              | nmd       | Adult | 1.4 | no  | no  | No      |                                |
| 502              | nmd       | Adult | 1.4 | no  | no  | Yes     | Clinician decision             |
| 503              | nmd       | Child | 7.8 | no  | no  | No      |                                |
| 504              | nmd       | Child | 6.7 | no  | no  | Yes     | No haematological response     |
| 505              | Not CaHUS | Child | 4.2 | yes | no  | Yes     | Other diagnosis                |
| 506              | Not CaHUS | Adult | 2.4 | no  | no  | Yes     | Non recovery of renal function |
| 507              | Not CaHUS | Adult | 5.8 | yes | no  | Yes     | Non recovery of renal function |
| 508              | Not CaHUS | Child | 1.8 | yes | no  | Yes     | Non response                   |
| 509              | Not CaHUS | Adult | 5.0 | no  | no  | Yes     | Sepsis                         |
| 510              | Not CaHUS | Child | 4.9 | no  | yes | Yes     | Other genetic TMA              |
| 511 <sup>s</sup> | Not CaHUS | Child | 2.9 | no  | no  | Yes     | STEC                           |
| 512              | Not CaHUS | Child | 5.6 | no  | no  | Yes     | STEC                           |
| 513              | Not CaHUS | Adult | 4.4 | no  | no  | Yes     | STEC                           |
| 514              | Not CaHUS | Adult | 5.1 |     |     | Yes     | Scleroderma                    |
| 515              | Not CaHUS | Adult | 5.8 |     |     | Yes     | STEC                           |
| 516              | Not CaHUS | Adult | 5.7 | yes | U   | Yes     | Scleroderma                    |
| 517              | Not CaHUS | Child | 6.0 | yes | no  | Yes     | Non recovery of renal function |
| 518              | Not CaHUS | Child | 8.1 | no  | no  | Yes     | Other diagnosis                |
| 519              | Not CaHUS | Child | 7.3 | no  | no  | Yes     | Other genetic TMA              |
| 520              | Not CaHUS | Child | 7.3 | no  | no  | Yes     | Other genetic TMA              |
| 521              | Not CaHUS | Adult | 1.0 | no  | no  | Yes     | Drug associated TMA            |
| 522              | Not CaHUS | Adult | 1.2 | yes | no  | Yes     | Scleroderma                    |
| 523              | Not CaHUS | Adult | 1.2 | no  | no  | Yes     | No TMA on biopsy               |
| 524              | Not CaHUS | Adult | 1.1 | no  | no  | Yes     | PPH                            |
| 525              | Not CaHUS | Child | 6.0 | no  | no  | Yes     | Other genetic TMA              |
| 526              | Not CaHUS | Child | 0.5 | no  | yes | Yes     | Other genetic TMA              |



|     |           |       |     |     |     |     |                                    |
|-----|-----------|-------|-----|-----|-----|-----|------------------------------------|
| 527 | Not CaHUS | Child | 0.1 | no  | yes | Yes | Other genetic TMA                  |
| 528 | Not CaHUS | Child | 2.0 | no  | no  | Yes | Other genetic TMA                  |
| 529 | Not CaHUS | Child | 2.0 | no  | no  | Yes | STEC                               |
| 530 | Not CaHUS | Adult | 2.3 | no  | no  | No  |                                    |
| 531 | Not CaHUS | Adult | 2.1 | no  | no  | Yes | STEC                               |
| 532 | Not CaHUS | Adult | 2.2 |     |     | Yes | Non response                       |
| 533 | Not CaHUS | Child | 3.0 | yes | no  | Yes | Other diagnosis                    |
| 534 | Not CaHUS | Adult | 3.0 | yes | no  | Yes | Other glomerular disease diagnosis |
| 535 | Not CaHUS | Child | 3.0 | no  | no  | Yes | Sepsis                             |
| 536 | Not CaHUS | Child | 3.1 | no  | no  | Yes | STEC                               |
| 537 | Not CaHUS | Child | 3.6 | no  | no  | Yes | STEC                               |
| 538 | Not CaHUS | Child | 3.8 | no  | no  | Yes | STEC                               |
| 539 | Not CaHUS | Child | 4.0 | yes | no  | Yes | STEC                               |
| 540 | Not CaHUS | Adult | 3.9 | no  | no  | Yes | STEC                               |
| 541 | Not CaHUS | Adult | 4.5 | no  | no  | Yes | Drug associated TMA                |
| 542 | Not CaHUS | Adult | 3.1 | no  | no  | Yes | Sepsis                             |
| 543 | Not CaHUS | Adult | 1.6 | no  | no  | Yes | Other glomerular disease diagnosis |
| 544 | Not CaHUS | Adult | 1.5 | no  | no  | Yes | No TMA on biopsy                   |
| 545 | Not CaHUS | Child | 1.8 | no  | no  | Yes | Other diagnosis                    |
| 546 | Not CaHUS | Child | 2.9 | no  | yes | Yes | Non response                       |
| 547 | Not CaHUS | Child | 0.1 | no  | yes | No  |                                    |
| 548 | Not CaHUS | Child | 7.5 | yes | no  | Yes | Other genetic TMA                  |
| 549 | Not CaHUS | Child | 6.2 | no  | no  | Yes | Other diagnosis                    |

Abbreviations: ACR, albumin creatinine ratio; eGFR, estimated glomerular filtration rate; ESRD, end stage renal disease; HUS, haemolytic uraemic syndrome; nmd, no mutation detected; PCR, protein creatinine ratio; PPH, post-partum haemorrhage; SETS, Stopping Eculizumab Treatment Safely in aHUS clinical trial; STEC-HUS, shiga toxin-producing *E. coli* haemolytic uraemic syndrome; TMA, thrombotic microangiopathy.

\*Causes of death detailed in eTable 5.

**eTable 5:** Causes of death

| <b>Patient number</b> | <b>Gene</b>      | <b>ESKD</b> | <b>Cause of death</b>                   |
|-----------------------|------------------|-------------|-----------------------------------------|
| 320                   | <i>CFH</i>       | Y           | Non adherence                           |
| 352                   | <i>CFHR1:CFH</i> | N           | Cardiac arrest                          |
| 412                   | VUS              | Y           | Unknown                                 |
| 413                   | VUS              | N           | Unknown                                 |
| 415                   | VUS              | Y           | Sepsis                                  |
| 428                   | nmd              | N           | Multi-organ failure                     |
| 431                   | nmd              | Y           | Sepsis                                  |
| 433                   | nmd              | Y           | Unknown                                 |
| 451                   | nmd              | N           | Cerebral microangiopathic thrombosis    |
| 455                   | nmd              | Y           | Intracranial haemorrhage                |
| 464                   | nmd              | N           | Sepsis                                  |
| 474                   | nmd              | N           | Pulmonary embolism                      |
| 475                   | nmd              | Y           | Unknown                                 |
| 478                   | nmd              | N           | Unknown                                 |
| 479                   | nmd              | Y           | Non adherence                           |
| 492                   | nmd              | Y           | Unknown                                 |
| 510                   | Not CaHUS        | N           | Other genetic TMA, multi system disease |
| 526                   | Not CaHUS        | N           | Other genetic TMA, multi system disease |
| 527                   | Not CaHUS        | N           | Other genetic TMA, multi system disease |
| 546                   | Not CaHUS        | N           | Unknown                                 |
| 547                   | Not CaHUS        | N           | Multi organ failure                     |

## **The NRCTC aHUS Research Consortium**

Department of Paediatric Nephrology, Alder Hey Children's NHS Foundation Trust, Liverpool, United Kingdom

Dr Richard Holt

Dr Caroline Jones

Department of Nephrology, Barts Health NHS Trust, London, England, United Kingdom

Dr Neil Ashman

Dr Stanley Fan

Dr Suzanne Forbes

Dr Ravindra Rajakariar

Department of Nephrology and Kidney Transplantation, Beaumont Hospital, Dublin, Ireland

Prof Declan De Freitas

Dr Colm Magee

Department of Nephrology, Belfast City Hospital, Belfast, Northern Ireland, United Kingdom

Dr Jennifer Hanco

Department of Nephrology, Birmingham Women's and Children's NHS Foundation Trust, Birmingham, England, United Kingdom

Dr David Milford

Department of Paediatric Nephrology, Birmingham Women's and Children's NHS Foundation Trust, Birmingham, England, United Kingdom

Dr Mordi Muorah

Department of Pathology, Birmingham Women's and Children's NHS Foundation Trust, Birmingham, England, United Kingdom

Prof Alexander J Howie

Department of Nephrology, University Hospitals Birmingham NHS Foundation Trust, Birmingham, England, United Kingdom

Dr Jyoti Baharani

Prof Indranil Dasgupta

Department of Nephrology, Bradford Teaching Hospitals NHS Foundation Trust, Bradford, England, United Kingdom

Dr Russell Roberts

Department of Nephrology, Brighton and Sussex University Hospitals NHS Trust, Brighton, England, United Kingdom

Dr Adam MacDiarmid-Gordon

Department of Nephrology, Cambridge University Hospitals NHS Foundation Trust, Cambridge, England, United Kingdom

Dr Andrew Fry

Dr Nicholas Torpey

Department of Paediatric Nephrology, Children's Health Ireland at Crumlin, Dublin, Ireland

Dr Mary Waldron

Department of Paediatric Nephrology, Children's Health Ireland at Temple Street, Dublin, Ireland  
Dr Atif Awan  
Dr Tara Raftery

Department of Nephrology, East and North Hertfordshire NHS Trust, Stevenage, United Kingdom  
Dr Laura Ratcliffe  
Dr Enric Vilar

Department of Haematology, East Sussex Healthcare NHS Trust, Eastbourne, England, United Kingdom  
Dr Joel Newman  
Dr Dale Seviar

Department of Paediatric Nephrology, Great Ormond Street Hospital for Children, London, England, United Kingdom  
Dr Stephen D Marks  
Prof Lesley Rees  
Dr Aoife Waters

Department of Nephrology, Guy's and St Thomas' NHS Foundation Trust, London, England, United Kingdom  
Dr Paramit Chowdhury  
Dr James Pattison

Department of Paediatric Nephrology, Guy's and St Thomas' NHS Foundation Trust, London, England, United Kingdom  
Caroline Booth

Department of Nephrology, Hull University Teaching Hospitals NHS Trust, Hull, England, United Kingdom  
Dr Nicole Williams

Department of Nephrology, Imperial College Healthcare NHS Trust, London, England, United Kingdom  
Dr Richard Corbett

Department of Paediatric Nephrology, Imperial College Healthcare NHS Trust, London, England, United Kingdom  
Dr Beena Amin

Department of Rheumatology, Imperial College Healthcare NHS Trust, London, England, United Kingdom  
Prof Matthew Pickering

Department of Nephrology, King's College Hospital NHS Foundation Trust, London, England, United Kingdom  
Dr Kate Bramham

Department of Genetics, King Faisal Specialist Hospital and Research Centre, Riyadh, Saudi Arabia  
Dr Mohamed Al-Hamed

Department of Haematology, The Leeds Teaching Hospitals NHS Foundation Trust, Leeds, England, United Kingdom  
Dr Anita Hill

Department of Nephrology, The Leeds Teaching Hospitals NHS Foundation Trust, Leeds, England, United Kingdom  
Dr Andrew Mooney

Department of Paediatric Nephrology, The Leeds Teaching Hospitals NHS Foundation Trust, Leeds, England, United Kingdom  
Dr Eric Finlay  
Dr Amanda Newnham  
Dr Pallavi Yadav

Department of Paediatric Nephrology, Manchester University NHS Foundation Trust, Manchester, England, United Kingdom  
Dr Amrit Kaur  
Dr Nicholas Plant  
Dr Mohan Shenoy

Department of Nephrology, Mount Elizabeth Hospital, Singapore  
Dr Lye Wai Choong

Department of Nephrology, NHS Ayrshire and Arran, Kilmarnock, Scotland, United Kingdom  
Dr Aileen Helps

Department of Nephrology, NHS Dumfries and Galloway, Dumfries, Scotland, United Kingdom  
Robert McLemon  
Dr Thalakunte Muniraju

Department of Nephrology, NHS Grampian, Aberdeen, Scotland, United Kingdom  
Dr Izhar Khan  
Dr Dana Kidder

Department of Nephrology, NHS Greater Glasgow and Clyde, Glasgow, Scotland, United Kingdom  
Dr Neal Padmanabhan

Department of Nephrology, NHS Lanarkshire, Scotland, United Kingdom  
Dr Zoe Cousland  
Dr Jonathan Price  
Dr Alison Taylor

Department of Nephrology, NHS Tayside, Dundee, Scotland, United Kingdom  
Dr Claudine Jennings

National Renal Complement Therapeutics Centre, Newcastle upon Tyne NHS Foundation Trust, Newcastle upon Tyne, England, United Kingdom  
Lisa Batchelor  
Dr Vicky Brocklebank  
Dr Emily Glover  
Dr Thomas Hallam  
Dr Sally Johnson  
Prof David Kavanagh  
Dr Michal Malina  
Prof Kevin J Marchbank  
Christine Maville  
Dr Emma Montgomery  
Prof Neil S Sheerin  
Dr Kate Smith-Jackson  
Dr Patrick R Walsh  
Dr Valerie Wilson

Dr Edwin K S Wong

Population Health Sciences Institute, Newcastle University, Newcastle upon Tyne, England, United Kingdom  
Dr Theophile Bigirumurame

Department of Nephrology, Northampton General Hospital NHS Trust, Northampton, England, United Kingdom  
Dr Sohail Ahmad

Department of Nephrology, North Cumbria Integrated Care NHS Foundation Trust, England, United Kingdom  
Dr Paul Mead

Department of Paediatric Nephrology, North West Anglia NHS Foundation Trust, Peterborough, England,  
United Kingdom  
Dr Mona Aslam

Department of Nephrology, Nottingham University Hospitals NHS Trust, Nottingham, England, United Kingdom  
Dr Charlotte Bebb  
Dr Catherine Byrne  
Dr Alastair Ferraro

Department of Paediatric Nephrology, Nottingham University Hospitals NHS Trust, Nottingham, England,  
United Kingdom  
Dr Martin Christian  
Dr Jonathan Evans  
Dr Jon Jin Kim  
Dr Andrew Lunn  
Dr Meeta Mallik

Department of Nephrology, Oxford University Hospitals NHS Foundation Trust, Oxford, United Kingdom  
Dr Phil Mason  
Prof David Mole

Department of Paediatrics, Oxford University Hospitals NHS Foundation Trust, Oxford, United Kingdom  
Dr Janet Craze

Department of Nephrology, Portsmouth Hospitals NHS Trust, Portsmouth, England, United Kingdom  
Dr Nicholas Sangala  
Dr Mark Uniacke

Department of Nephrology, Queen Elizabeth University Hospital, Glasgow, Scotland, United Kingdom  
Dr Ellon McGregor

Department of Nephrology, Raigmore Hospital, Inverness, Scotland, United Kingdom  
Dr Stewart Lambie

Department of Paediatric Nephrology, The Royal Belfast Hospital for Sick Children, Belfast, Northern Ireland,  
United Kingdom

Department of Nephrology, Royal Berkshire NHS Foundation Trust, Reading, England, United Kingdom  
Dr Nitin Bhandary  
Dr Oliver Flossmann  
Dr Mobin Mohteshamzadeh

Department of Nephrology, Royal Darwin Hospital, Northern Territory, Australia  
Dr Asanga Abeyaratne

Department of Nephrology, Royal Devon and Exeter NHS Foundation Trust, Exeter, England, United Kingdom  
Dr Coralie Bingham  
Dr Rhian Clissold  
Dr Lucy Smyth

Department of Nephrology, Royal Free London NHS Foundation Trust, London, United Kingdom  
Dr John Connolly

Department of Paediatric Nephrology, Royal Hospital for Children, Glasgow, Scotland, United Kingdom  
Dr Ben Reynolds

Department of Nephrology, Royal Infirmary of Edinburgh, Edinburgh, Scotland, United Kingdom  
Dr John Neary

Department of Haematology, The Royal Liverpool and Broadgreen University Hospitals NHS Trust, Liverpool, England, United Kingdom  
Joanne Bell  
Dr Tina Dutt

Department of Nephrology, Royal North Shore Hospital, Sydney, New South Wales, Australia  
Dr Sarah Roxburgh

Department of Nephrology, St George's University Hospitals NHS Foundation Trust, London, England, United Kingdom  
Dr Joyce Popoola

Department of Nephrology, Salford Royal NHS Foundation Trust, Salford, England, United Kingdom  
Dr Rosie Donne  
Prof Smeeta Sinha

Department of Nephrology, Sheffield Teaching Hospitals NHS Foundation Trust, Sheffield, England, United Kingdom  
Dr Nicholas Fardon  
Dr Arif Khwaja  
Dr Shareen Siddiqi

Division of Paediatric Nephrology, Sheikh Khalifa Medical City, Abu Dhabi, United Arab Emirates  
Dr Gurinder Kumar

Department of Nephrology, South Tees Hospitals NHS Foundation Trust, Middlesbrough, England, United Kingdom  
Dr Steve Kardasz  
Dr Iain Moore  
Dr Didem Tez  
Dr Jamie Willows

Department of Nephrology, South Tyneside and Sunderland Foundation Trust, Sunderland, England, United Kingdom  
Dr Rachel Davison

Department of Nephrology, Southern Health and Social Care Trust, Newry, Northern Ireland, United Kingdom

Dr John Harty

Department of Paediatric Nephrology, Starship Children's Hospital, Auckland, New Zealand  
Dr William Wong

Department of Nephrology, Swansea Bay University Health Board, Swansea, Wales, United Kingdom  
Dr Andrew J Williams

Department of Nephrology, University College London, London, England, United Kingdom  
Dr Daniel P Gale

Department of Paediatric Nephrology, University Hospitals Bristol NHS Foundation Trust, Bristol, England,  
United Kingdom  
Prof Richard Coward  
Dr Carol Inward  
Dr Martin Mraz

Department of Nephrology, University Hospitals Coventry and Warwickshire NHS Trust, Coventry, United  
Kingdom  
Dr Waqar Ayub  
Dr Andrew Short

Department of Nephrology, University Hospital Galway, Galway, Ireland  
Dr David Lappin

Department of Nephrology, University Hospitals of Leicester NHS Trust, Leicester, England, United Kingdom  
Dr Richard Baines

Department of Nephrology, University Hospitals Plymouth NHS Trust, Plymouth, England, United Kingdom  
Dr Girish Bommayya  
Dr Kris Houlberg  
Dr Imran Saif

Department of Paediatric Nephrology, University Hospital Southampton NHS Foundation Trust, Southampton,  
United Kingdom  
Dr Rodney Gilbert

Department of Nephrology, University Hospital of Wales, Cardiff, Wales, United Kingdom  
Dr Sian Griffin

Department of Paediatric Nephrology, University Hospital of Wales, Cardiff, Wales, United Kingdom  
Dr Graham Smith  
Dr Judith Van Der Voort

Division of Paediatric Nephrology, University of Miami, Miami, Florida, United States of America  
Dr Jayanthi Chandar  
Prof Michael Freundlich

Department of Nephrology, Western Health and Social Care Trust, Londonderry, Northern Ireland, United  
Kingdom  
Dr Frank McCarroll

Renal Unit, Westmead Hospital, Westmead, New South Wales, Australia



Dr Germaine Wong

Department of Nephrology, York Hospitals NHS Foundation Trust, York, England, United Kingdom

Dr Paul Laboi

Dr Rebekah Molyneux
